# Supplementary material for: Genomic Expression Profiling and Bioinformatics Analysis of Chronic Recurrent Multifocal Osteomyelitis
Source: Hindawi journal article supplement (doi:10.1155/2021/6898093), 2021-01-01
Supplement: f6 [file 6898093.f6.pdf]

| GeneID | Gene. syml | baseMean | logFC    | lfcSE    | stat     | PValue   | FDR      |
|--------|------------|----------|----------|----------|----------|----------|----------|
| 5689   | PSMB1      | 492.5637 | 3.23197  | 0.339503 | 9.519701 | 1.74E-21 | 2.13E-17 |
| 1476   | CSTB       | 117.7362 | 4.06927  | 0.490468 | 8.296703 | 1.07E-16 | 6.57E-13 |
| 2512   | FTL        | 1339.244 | 2.43132  | 0.324784 | 7.485968 | 7.10E-14 | 2.91E-10 |
| 3920   | LAMP2      | 297.502  | 2.382048 | 0.339133 | 7.023935 | 2.16E-12 | 6.62E-09 |
| 86781  | RPS2P7     | 86.70384 | 3.342528 | 0.478375 | 6.987258 | 2.80E-12 | 6.88E-09 |
| 10581  | IFITM2     | 2159.19  | 2.473191 | 0.361171 | 6.847693 | 7.51E-12 | 1.54E-08 |
| 6386   | SDCBP      | 273.5472 | 2.462441 | 0.361259 | 6.816272 | 9.34E-12 | 1.64E-08 |
| 1915   | EEF1A1     | 1493.622 | 2.60243  | 0.384334 | 6.771263 | 1.28E-11 | 1.96E-08 |
| 7114   | TMSB4X     | 2581.911 | 3.920136 | 0.585325 | 6.697361 | 2.12E-11 | 2.90E-08 |
| 6426   | SRSF1      | 97.43666 | 3.234613 | 0.484399 | 6.67758  | 2.43E-11 | 2.98E-08 |
| 6036   | RNASE2     | 100.9149 | 3.252232 | 0.500644 | 6.496091 | 8.24E-11 | 9.20E-08 |
| 4170   | MCL1       | 960.7553 | 2.420114 | 0.374885 | 6.455611 | 1.08E-10 | 1.10E-07 |
| 11345  | GABARAPL1  | 110.5201 | 3.092886 | 0.482636 | 6.408314 | 1.47E-10 | 1.39E-07 |
| 23492  | CBX7       | 160.1396 | 2.954944 | 0.463528 | 6.374895 | 1.83E-10 | 1.61E-07 |
| 55544  | RBM38      | 452.1999 | 2.867801 | 0.459878 | 6.236    | 4.49E-10 | 3.67E-07 |
| 6891   | TAP2       | 214.9342 | 2.526543 | 0.410245 | 6.158615 | 7.34E-10 | 5.63E-07 |
| 285045 | LINC00486  | 240.4686 | 2.181415 | 0.361745 | 6.030258 | 1.64E-09 | 1.18E-06 |
| 56666  | PANX2      | 58.22881 | 3.502241 | 0.585056 | 5.986166 | 2.15E-09 | 1.47E-06 |
| 50854  | C6orf48    | 163.5332 | 2.967623 | 0.50398  | 5.888374 | 3.90E-09 | 2.24E-06 |
| 401316 | EIF4HP1    | 36.27378 | 4.763337 | 0.808418 | 5.89217  | 3.81E-09 | 2.24E-06 |
| 6277   | S100A6     | 961.7563 | 2.485616 | 0.420883 | 5.90571  | 3.51E-09 | 2.24E-06 |
| 10106  | CTDSP2     | 154.9161 | 3.029587 | 0.514943 | 5.883341 | 4.02E-09 | 2.24E-06 |
| 14     | AAMP       | 80.68037 | 2.857903 | 0.488034 | 5.855953 | 4.74E-09 | 2.53E-06 |
| 59286  | UBL5       | 177.1674 | 1.845272 | 0.316235 | 5.835137 | 5.37E-09 | 2.75E-06 |
| 10437  | IFI30      | 259.4903 | 2.194243 | 0.377897 | 5.806454 | 6.38E-09 | 3.13E-06 |
| 10365  | KLF2       | 105.8084 | 2.813724 | 0.488653 | 5.758122 | 8.51E-09 | 4.02E-06 |
| 6279   | S100A8     | 1186.212 | 2.279448 | 0.396584 | 5.747708 | 9.05E-09 | 4.11E-06 |
| 6169   | RPL38      | 847.5438 | 2.118785 | 0.377988 | 5.605424 | 2.08E-08 | 9.11E-06 |
| 6398   | SECTM1     | 296.9423 | 3.479102 | 0.624725 | 5.56901  | 2.56E-08 | 1.08E-05 |
| 9553   | MRPL33     | 31.50428 | 3.281456 | 0.593716 | 5.526981 | 3.26E-08 | 1.33E-05 |
| 29920  | PYCR2      | 150.2676 | 3.53965  | 0.64175  | 5.515621 | 3.48E-08 | 1.38E-05 |
| 646195 | RPS28P7    | 1188.966 | 2.746122 | 0.501442 | 5.476447 | 4.34E-08 | 1.61E-05 |
| 56655  | POLE4      | 71.31313 | 2.594809 | 0.473668 | 5.47812  | 4.30E-08 | 1.61E-05 |
| 3122   | HLA-DRA    | 935.6301 | 2.213844 | 0.406874 | 5.441106 | 5.30E-08 | 1.86E-05 |
| 4069   | LYZ        | 934.5962 | 2.38983  | 0.438892 | 5.445143 | 5.18E-08 | 1.86E-05 |
| 684    | BST2       | 244.1674 | 2.549867 | 0.476439 | 5.351928 | 8.70E-08 | 2.97E-05 |
| 1848   | DUSP6      | 130.7128 | 2.51837  | 0.47237  | 5.33135  | 9.75E-08 | 3.23E-05 |
| 54940  | OCIAD1     | 232.3372 | 1.888725 | 0.355554 | 5.312067 | 1.08E-07 | 3.41E-05 |
| 219988 | PATL1      | 100.8544 | 2.399085 | 0.451455 | 5.314122 | 1.07E-07 | 3.41E-05 |
| 146225 | CMTM2      | 229.6756 | 1.807295 | 0.350131 | 5.161774 | 2.45E-07 | 7.51E-05 |
| 730257 | LOC730257  | 72.67    | 2.613064 | 0.516624 | 5.057958 | 4.24E-07 | 0.000127 |
| 140717 | RPL37AP1   | 19.26886 | 3.497307 | 0.693063 | 5.04616  | 4.51E-07 | 0.000132 |
| 6636   | SNRPF      | 108.6667 | 2.166803 | 0.433294 | 5.000771 | 5.71E-07 | 0.000163 |
| 114769 | CARD16     | 64.39771 | 2.192662 | 0.439093 | 4.993611 | 5.93E-07 | 0.000165 |
| 7280   | TUBB2A     | 36.59507 | 3.596234 | 0.722831 | 4.975204 | 6.52E-07 | 0.000178 |
| 360    | AQP3       | 21.78828 | 4.325612 | 0.882808 | 4.899832 | 9.59E-07 | 0.000252 |
| 54994  | GID8       | 174.0617 | 2.039334 | 0.416313 | 4.898555 | 9.65E-07 | 0.000252 |
| 292    | SLC25A5    | 45.44172 | 2.991946 | 0.611253 | 4.894773 | 9.84E-07 | 0.000252 |
| 283149 | BCL9L      | 50.66015 | -2.16449 | 0.442774 | -4.88848 | 1.02E-06 | 0.000255 |
| 4616   | GADD45B    | 59.37816 | 2.258229 | 0.463003 | 4.877356 | 1.08E-06 | 0.000264 |
| 3190   | HNRNPK     | 748.3919 | 1.7507   | 0.360682 | 4.853859 | 1.21E-06 | 0.000282 |
| 729903 | RPS16P10   | 15.3206  | 4.188373 | 0.863074 | 4.852854 | 1.22E-06 | 0.000282 |
| 9689   | BZW1       | 64.14655 | 2.176353 | 0.447966 | 4.858298 | 1.18E-06 | 0.000282 |

|          |           |          |          |          |          |          |          |
|----------|-----------|----------|----------|----------|----------|----------|----------|
| 11344    | TWF2      | 331.026  | 2.679022 | 0.55451  | 4.831332 | 1.36E-06 | 0.000308 |
| 441951   | ZFAS1     | 178.2944 | 1.599663 | 0.331794 | 4.821255 | 1.43E-06 | 0.000318 |
| 5997     | RGS2      | 228.9873 | 2.75286  | 0.573369 | 4.801203 | 1.58E-06 | 0.000346 |
| 5660     | PSAP      | 5610.105 | 1.673915 | 0.349416 | 4.790607 | 1.66E-06 | 0.000358 |
| 23480    | SEC61G    | 18.42118 | 3.939326 | 0.824477 | 4.777967 | 1.77E-06 | 0.000363 |
| 4701     | NDUFA7    | 41.2165  | 2.220493 | 0.464782 | 4.777491 | 1.77E-06 | 0.000363 |
| 51374    | ATRAID    | 16.73102 | 3.961571 | 0.828775 | 4.780033 | 1.75E-06 | 0.000363 |
| 10957    | PNRC1     | 95.19256 | 2.318599 | 0.486813 | 4.762817 | 1.91E-06 | 0.000379 |
| 1032     | CDKN2D    | 314.6501 | 2.321181 | 0.487404 | 4.762332 | 1.91E-06 | 0.000379 |
| 1351     | COX8A     | 101.8265 | 1.810727 | 0.381865 | 4.741799 | 2.12E-06 | 0.000413 |
| 29777    | ABT1      | 28.46248 | 2.681973 | 0.566036 | 4.73817  | 2.16E-06 | 0.000414 |
| 3105     | HLA-A     | 1151.411 | 1.792955 | 0.379688 | 4.72218  | 2.33E-06 | 0.000441 |
| 221838   | EEF1A1P6  | 197.9793 | 1.953356 | 0.414604 | 4.711379 | 2.46E-06 | 0.000458 |
| 56882    | CDC42SE1  | 72.31925 | 2.14317  | 0.455256 | 4.707614 | 2.51E-06 | 0.000459 |
| 1.05E+08 | LOC105370 | 141.6979 | 1.68183  | 0.357648 | 4.70247  | 2.57E-06 | 0.000464 |
| 1.02E+08 | LOC101929 | 303.0867 | 1.955511 | 0.416316 | 4.697177 | 2.64E-06 | 0.000469 |
| 2766     | GMPR      | 172.4453 | 2.758569 | 0.590178 | 4.674131 | 2.95E-06 | 0.000499 |
| 25798    | BRI3      | 221.3943 | 1.516784 | 0.324581 | 4.673047 | 2.97E-06 | 0.000499 |
| 4259     | MGST3     | 77.54971 | 1.800799 | 0.385347 | 4.673183 | 2.97E-06 | 0.000499 |
| 55505    | NOP10     | 39.83246 | 2.345007 | 0.501255 | 4.678268 | 2.89E-06 | 0.000499 |
| 115992   | RNF166    | 74.66158 | 2.951859 | 0.632824 | 4.664583 | 3.09E-06 | 0.000513 |
| 5089     | PBX2      | 573.9175 | 1.698655 | 0.365607 | 4.646119 | 3.38E-06 | 0.000546 |
| 10628    | TXNIP     | 1097.743 | 1.783399 | 0.383664 | 4.648334 | 3.35E-06 | 0.000546 |
| 5292     | PIM1      | 148.6191 | 2.535856 | 0.546482 | 4.640331 | 3.48E-06 | 0.000555 |
| 3310     | HSPA6     | 36.99044 | 3.025188 | 0.653274 | 4.630808 | 3.64E-06 | 0.000571 |
| 83547    | RILP      | 44.43085 | 2.544441 | 0.549655 | 4.629157 | 3.67E-06 | 0.000571 |
| 5216     | PFN1      | 113.4626 | 2.471081 | 0.534715 | 4.621304 | 3.81E-06 | 0.000585 |
| 4696     | NDUFA3    | 100.2802 | 1.917345 | 0.415471 | 4.614872 | 3.93E-06 | 0.000596 |
| 526      | ATP6V1B2  | 329.2354 | 2.601238 | 0.564194 | 4.610539 | 4.02E-06 | 0.000601 |
| 6129     | RPL7      | 84.24218 | 2.211109 | 0.48009  | 4.605616 | 4.11E-06 | 0.000601 |
| 374882   | TMEM205   | 35.84483 | 2.139865 | 0.464572 | 4.606103 | 4.10E-06 | 0.000601 |
| 4318     | MMP9      | 131.4771 | 2.711587 | 0.591648 | 4.583112 | 4.58E-06 | 0.000654 |
| 27013    | CNPPD1    | 156.9419 | 1.775284 | 0.387286 | 4.583909 | 4.56E-06 | 0.000654 |
| 55577    | NAGK      | 143.4832 | 1.848613 | 0.403743 | 4.578687 | 4.68E-06 | 0.00066  |
| 199      | AIF1      | 254.8832 | 2.074335 | 0.453916 | 4.569869 | 4.88E-06 | 0.000681 |
| 1.03E+08 | LOC102724 | 780.3782 | 1.56961  | 0.343912 | 4.563987 | 5.02E-06 | 0.000692 |
| 51504    | TRMT112   | 13.92283 | 4.413701 | 0.968712 | 4.556257 | 5.21E-06 | 0.00071  |
| 4792     | NFKBIA    | 232.3831 | 1.843828 | 0.405562 | 4.546355 | 5.46E-06 | 0.000736 |
| 7127     | TNFAIP2   | 204.4636 | 2.750212 | 0.606834 | 4.53207  | 5.84E-06 | 0.000779 |
| 8660     | IRS2      | 243.3159 | 1.78638  | 0.394818 | 4.524564 | 6.05E-06 | 0.000799 |
| 10209    | EIF1      | 769.5728 | 1.484154 | 0.330723 | 4.487606 | 7.20E-06 | 0.000941 |
| 1843     | DUSP1     | 16.06484 | 3.370014 | 0.751485 | 4.48447  | 7.31E-06 | 0.000945 |
| 1675     | CFD       | 253.1698 | 1.664319 | 0.371987 | 4.474136 | 7.67E-06 | 0.000981 |
| 81631    | MAP1LC3B  | 74.59492 | 2.004284 | 0.448801 | 4.465861 | 7.97E-06 | 0.001009 |
| 6388     | SDF2      | 34.52816 | 2.287037 | 0.512563 | 4.461963 | 8.12E-06 | 0.001017 |
| 1E+08    | LOC100287 | 59.5266  | 1.73659  | 0.389923 | 4.45367  | 8.44E-06 | 0.001047 |
| 113      | ADCY7     | 130.9015 | 1.884964 | 0.42516  | 4.433543 | 9.27E-06 | 0.001138 |
| 7431     | VIM       | 98.83678 | 1.730627 | 0.392137 | 4.413324 | 1.02E-05 | 0.001213 |
| 4707     | NDUFB1    | 173.5507 | 1.567431 | 0.355033 | 4.414889 | 1.01E-05 | 0.001213 |
| 4535     | ND1       | 2166.845 | 2.446345 | 0.553927 | 4.416366 | 1.00E-05 | 0.001213 |
| 22971    | RPL41P1   | 200.9689 | 2.390568 | 0.54261  | 4.405685 | 1.05E-05 | 0.001239 |
| 150223   | YDJC      | 31.01615 | 2.306425 | 0.523632 | 4.404669 | 1.06E-05 | 0.001239 |
| 6143     | RPL19     | 414.5781 | 1.76298  | 0.401399 | 4.392086 | 1.12E-05 | 0.0013   |
| 1052     | CEBPD     | 109.6727 | 1.92558  | 0.439402 | 4.382274 | 1.17E-05 | 0.001327 |

|                  |          |          |          |          |          |          |
|------------------|----------|----------|----------|----------|----------|----------|
| 3726 JUNB        | 288.7024 | 2.102215 | 0.47977  | 4.381711 | 1.18E-05 | 0.001327 |
| 1050 CEBPA       | 60.03583 | 2.438119 | 0.556447 | 4.381584 | 1.18E-05 | 0.001327 |
| 746 TMEM258      | 220.615  | 1.713251 | 0.391429 | 4.376913 | 1.20E-05 | 0.001344 |
| 64207 IRF2BPL    | 432.1453 | 1.991017 | 0.455283 | 4.373144 | 1.22E-05 | 0.001355 |
| 6167 RPL37       | 1245.523 | 1.679647 | 0.385341 | 4.358857 | 1.31E-05 | 0.001401 |
| 728535 LOC728535 | 88.75019 | -1.68466 | 0.386537 | -4.35833 | 1.31E-05 | 0.001401 |
| 6993 DYNLT1      | 75.46941 | 2.268607 | 0.519919 | 4.363385 | 1.28E-05 | 0.001401 |
| 28972 SPCS1      | 30.79581 | 2.365062 | 0.542693 | 4.358012 | 1.31E-05 | 0.001401 |
| 8666 EIF3G       | 33.11282 | 2.945726 | 0.678658 | 4.340515 | 1.42E-05 | 0.001505 |
| 339287 MSL1      | 142.4243 | 1.743148 | 0.402137 | 4.334713 | 1.46E-05 | 0.001532 |
| 415116 PIM3      | 288.2871 | 1.956034 | 0.452542 | 4.322322 | 1.54E-05 | 0.001607 |
| 567 B2M          | 3116.578 | 1.674562 | 0.387901 | 4.316987 | 1.58E-05 | 0.001632 |
| 101 ADAM8        | 355.9068 | 2.197494 | 0.509945 | 4.309278 | 1.64E-05 | 0.001676 |
| 4694 NDUFA1      | 251.6534 | 1.94292  | 0.451913 | 4.299318 | 1.71E-05 | 0.001738 |
| 30834 ZNRD1      | 31.2127  | 2.177551 | 0.508041 | 4.286169 | 1.82E-05 | 0.0018   |
| 11091 WDR5       | 64.47846 | 1.947784 | 0.454407 | 4.286432 | 1.82E-05 | 0.0018   |
| 808 CALM3        | 80.35284 | 1.901912 | 0.443737 | 4.286129 | 1.82E-05 | 0.0018   |
| 51123 ZNF706     | 27.92287 | 2.498177 | 0.588646 | 4.243938 | 2.20E-05 | 0.002157 |
| 81926 ABHD17A    | 114.0061 | 2.37731  | 0.561031 | 4.237395 | 2.26E-05 | 0.002203 |
| 4946 OAZ1        | 3220.257 | 1.780659 | 0.420623 | 4.233382 | 2.30E-05 | 0.002226 |
| 7305 TYROBP      | 537.4456 | 1.818607 | 0.430628 | 4.223155 | 2.41E-05 | 0.002311 |
| 9162 DGKI        | 180.6643 | 2.265442 | 0.537833 | 4.212169 | 2.53E-05 | 0.002407 |
| 51107 APH1A      | 757.4909 | 1.589667 | 0.377737 | 4.208393 | 2.57E-05 | 0.002411 |
| 8772 FADD        | 32.32382 | 2.185313 | 0.519238 | 4.208695 | 2.57E-05 | 0.002411 |
| 79132 DHX58      | 16.0012  | 3.18308  | 0.757532 | 4.201905 | 2.65E-05 | 0.002462 |
| 84317 CCDC115    | 41.55612 | 1.975773 | 0.470629 | 4.198154 | 2.69E-05 | 0.002484 |
| 64747 MFSD1      | 26.89945 | 2.257212 | 0.538813 | 4.189234 | 2.80E-05 | 0.002527 |
| 54472 TOLLIP     | 141.5103 | 2.203108 | 0.525756 | 4.19036  | 2.79E-05 | 0.002527 |
| 25801 GCA        | 88.15694 | 2.412287 | 0.57577  | 4.189673 | 2.79E-05 | 0.002527 |
| 219855 SLC37A2   | 40.56799 | 2.121431 | 0.506853 | 4.185492 | 2.85E-05 | 0.002532 |
| 517 ATP5G2       | 283.8351 | 1.513163 | 0.361462 | 4.186232 | 2.84E-05 | 0.002532 |
| 9230 RAB11B      | 142.9882 | 2.112611 | 0.50982  | 4.143839 | 3.42E-05 | 0.003017 |
| 10589 DRAP1      | 79.86348 | 2.485201 | 0.601173 | 4.133918 | 3.57E-05 | 0.003128 |
| 5552 SRGN        | 801.1274 | 1.811138 | 0.43849  | 4.130398 | 3.62E-05 | 0.003153 |
| 7846 TUBA1A      | 94.28399 | 1.901524 | 0.461266 | 4.122407 | 3.75E-05 | 0.003219 |
| 5432 POLR2C      | 47.68762 | 2.156672 | 0.52302  | 4.123495 | 3.73E-05 | 0.003219 |
| 50813 COPS7A     | 29.19298 | 2.702433 | 0.658615 | 4.103205 | 4.07E-05 | 0.003427 |
| 54935 DUSP23     | 30.45401 | 2.020919 | 0.492305 | 4.105016 | 4.04E-05 | 0.003427 |
| 6303 SAT1        | 221.6029 | 1.625861 | 0.39614  | 4.104262 | 4.06E-05 | 0.003427 |
| 10170 DHRS9      | 39.1785  | 2.384589 | 0.582276 | 4.095291 | 4.22E-05 | 0.003522 |
| 241 ALOX5AP      | 175.3691 | 1.533988 | 0.375196 | 4.088502 | 4.34E-05 | 0.003602 |
| 6957 TRB         | 1077.968 | 1.476834 | 0.362404 | 4.075101 | 4.60E-05 | 0.003784 |
| 10105 PPIF       | 17.46549 | 3.045227 | 0.747497 | 4.0739   | 4.62E-05 | 0.003784 |
| 64981 MRPL34     | 12.4026  | 3.411585 | 0.83987  | 4.062039 | 4.86E-05 | 0.003955 |
| 23399 CTDNEP1    | 252.8389 | 1.664826 | 0.41152  | 4.045551 | 5.22E-05 | 0.004217 |
| 2495 FTH1        | 1834.884 | 1.407453 | 0.348496 | 4.038649 | 5.38E-05 | 0.004286 |
| 11040 PIM2       | 200.6564 | 1.754541 | 0.434352 | 4.039447 | 5.36E-05 | 0.004286 |
| 27316 RBMX       | 249.9677 | -1.36433 | 0.337952 | -4.03706 | 5.41E-05 | 0.004287 |
| 3068 HDGF        | 179.1339 | 1.641134 | 0.407258 | 4.029718 | 5.58E-05 | 0.004367 |
| 7307 U2AF1       | 764.0513 | 1.888553 | 0.468565 | 4.030504 | 5.57E-05 | 0.004367 |
| 124460 SNX20     | 35.70888 | 2.270608 | 0.564344 | 4.023447 | 5.74E-05 | 0.004429 |
| 2537 IFI6        | 140.9047 | 1.574294 | 0.391261 | 4.023641 | 5.73E-05 | 0.004429 |
| 1200 TPP1        | 243.7706 | 1.191345 | 0.296273 | 4.02111  | 5.79E-05 | 0.004445 |
| 81622 UNC93B1    | 53.68494 | 2.219447 | 0.553423 | 4.010398 | 6.06E-05 | 0.004623 |

|          |           |          |          |          |          |          |          |
|----------|-----------|----------|----------|----------|----------|----------|----------|
| 205251   | LINC00116 | 14.15713 | 2.928177 | 0.731906 | 4.000759 | 6.31E-05 | 0.004785 |
| 29796    | UQCR10    | 50.71682 | 1.713753 | 0.428531 | 3.999133 | 6.36E-05 | 0.004789 |
| 140809   | SRXN1     | 41.65143 | 2.383424 | 0.59681  | 3.993607 | 6.51E-05 | 0.004872 |
| 6836     | SURF4     | 92.28314 | 1.742478 | 0.437026 | 3.987122 | 6.69E-05 | 0.004977 |
| 2050     | EPHB4     | 23.84414 | 3.555798 | 0.893596 | 3.9792   | 6.91E-05 | 0.005114 |
| 6888     | TALD01    | 568.6581 | 1.541927 | 0.387946 | 3.974591 | 7.05E-05 | 0.005183 |
| 1E+08    | RPL37AP5  | 11.75092 | 3.565544 | 0.899326 | 3.964685 | 7.35E-05 | 0.005371 |
| 1.05E+08 | LOC105370 | 15.86267 | 2.834172 | 0.716481 | 3.955685 | 7.63E-05 | 0.005544 |
| 92305    | TMEM129   | 56.10977 | 2.421312 | 0.612347 | 3.954149 | 7.68E-05 | 0.005547 |
| 8477     | GPR65     | 28.33946 | 2.350687 | 0.594734 | 3.952504 | 7.73E-05 | 0.005553 |
| 51714    | SELT      | 63.66299 | 1.631623 | 0.413212 | 3.948639 | 7.86E-05 | 0.005611 |
| 8843     | HCAR3     | 44.76758 | 2.450231 | 0.620812 | 3.94682  | 7.92E-05 | 0.005621 |
| 80256    | FAM214B   | 23.11362 | 2.488947 | 0.631622 | 3.940565 | 8.13E-05 | 0.005736 |
| 613037   | LOC613037 | 168.746  | -1.61427 | 0.409896 | -3.93825 | 8.21E-05 | 0.005759 |
| 1337     | COX6A1    | 72.04158 | 1.58235  | 0.402958 | 3.926835 | 8.61E-05 | 0.00597  |
| 23204    | ARL6IP1   | 34.03299 | 1.885685 | 0.480108 | 3.927626 | 8.58E-05 | 0.00597  |
| 23479    | ISCU      | 39.41452 | 2.009789 | 0.512401 | 3.922299 | 8.77E-05 | 0.00605  |
| 9636     | ISG15     | 81.32314 | 2.095505 | 0.534938 | 3.917288 | 8.96E-05 | 0.006142 |
| 401152   | C4orf3    | 55.15271 | 1.647594 | 0.421689 | 3.90713  | 9.34E-05 | 0.006336 |
| 9775     | EIF4A3    | 25.26783 | 2.32066  | 0.593782 | 3.908272 | 9.30E-05 | 0.006336 |
| 6717     | SRI       | 19.60495 | 2.384377 | 0.61103  | 3.902229 | 9.53E-05 | 0.00643  |
| 388      | RHOB      | 19.98467 | 2.951566 | 0.756794 | 3.900094 | 9.62E-05 | 0.006451 |
| 4001     | LMNB1     | 218.1674 | 1.278633 | 0.32829  | 3.894825 | 9.83E-05 | 0.006557 |
| 103910   | MYL12B    | 132.4825 | 1.583863 | 0.4084   | 3.878217 | 0.000105 | 0.006984 |
| 10094    | ARPC3     | 491.5799 | 1.70118  | 0.439731 | 3.868689 | 0.000109 | 0.007223 |
| 3663     | IRF5      | 14.34463 | 2.817022 | 0.728961 | 3.864436 | 0.000111 | 0.007311 |
| 51327    | AHSP      | 30.27183 | 2.702174 | 0.699502 | 3.862997 | 0.000112 | 0.007315 |
| 91689    | SMDT1     | 32.10314 | 1.980171 | 0.513958 | 3.852783 | 0.000117 | 0.007587 |
| 51296    | SLC15A3   | 45.65882 | 2.04474  | 0.534043 | 3.828791 | 0.000129 | 0.008322 |
| 80139    | ZNF703    | 25.76439 | 2.743788 | 0.719818 | 3.811783 | 0.000138 | 0.008869 |
| 6207     | RPS13     | 610.4137 | 1.79347  | 0.472416 | 3.796381 | 0.000147 | 0.009389 |
| 5692     | PSMB4     | 39.18346 | 1.867636 | 0.493077 | 3.787715 | 0.000152 | 0.009524 |
| 23135    | KDM6B     | 50.48684 | 2.708938 | 0.715185 | 3.787744 | 0.000152 | 0.009524 |
| 286444   | RPS2P55   | 23.70756 | 2.191162 | 0.578442 | 3.788042 | 0.000152 | 0.009524 |
| 4537     | ND3       | 1463.427 | 1.626926 | 0.429485 | 3.788082 | 0.000152 | 0.009524 |
| 5580     | PRKCD     | 147.4388 | 1.857507 | 0.490636 | 3.785914 | 0.000153 | 0.009545 |
| 409      | ARRB2     | 331.6486 | 1.850857 | 0.490125 | 3.776295 | 0.000159 | 0.009871 |
| 201163   | FLCN      | 83.03791 | 1.502127 | 0.399212 | 3.762728 | 0.000168 | 0.01037  |
| 6168     | RPL37A    | 8080.298 | 1.493079 | 0.397228 | 3.758749 | 0.000171 | 0.010483 |
| 3434     | IFIT1     | 42.68572 | 2.380157 | 0.63456  | 3.750875 | 0.000176 | 0.010764 |
| 1340     | COX6B1    | 144.3677 | 1.380555 | 0.368352 | 3.747927 | 0.000178 | 0.010784 |
| 7355     | SLC35A2   | 15.42938 | 2.533358 | 0.675767 | 3.748862 | 0.000178 | 0.010784 |
| 220359   | TIGD3     | 14.06199 | 2.75956  | 0.736567 | 3.746514 | 0.000179 | 0.010792 |
| 2876     | GPX1      | 230.2863 | 1.563767 | 0.418671 | 3.735073 | 0.000188 | 0.01124  |
| 3191     | HNRNPL    | 206.8327 | 1.179136 | 0.31637  | 3.727077 | 0.000194 | 0.011546 |
| 151579   | BZW1P2    | 41.16945 | 2.961526 | 0.796227 | 3.71945  | 0.0002   | 0.011842 |
| 4814     | NINJ1     | 72.00389 | 2.154994 | 0.580499 | 3.712313 | 0.000205 | 0.012065 |
| 6050     | RNH1      | 94.61143 | 1.962981 | 0.528758 | 3.712441 | 0.000205 | 0.012065 |
| 2358     | FPR2      | 19.50525 | 2.79326  | 0.753279 | 3.708134 | 0.000209 | 0.012207 |
| 23645    | PPP1R15A  | 26.4673  | 2.12159  | 0.572771 | 3.704081 | 0.000212 | 0.012345 |
| 4097     | MAFG      | 45.75951 | 1.968273 | 0.531739 | 3.701578 | 0.000214 | 0.012409 |
| 80149    | ZC3H12A   | 28.91771 | 2.065672 | 0.558636 | 3.697709 | 0.000218 | 0.012541 |
| 1E+08    | PET100    | 105.7331 | 1.417809 | 0.383994 | 3.692271 | 0.000222 | 0.012752 |
| 389342   | RPL10P9   | 64.89453 | 5.136749 | 1.396267 | 3.678915 | 0.000234 | 0.013376 |

|        |           |          |          |          |          |          |          |
|--------|-----------|----------|----------|----------|----------|----------|----------|
| 79887  | PLBD1     | 143.8897 | 1.963142 | 0.535392 | 3.666736 | 0.000246 | 0.013964 |
| 3311   | HSPA7     | 33.40458 | 2.952482 | 0.805982 | 3.663209 | 0.000249 | 0.014093 |
| 6817   | SULT1A1   | 38.98155 | 1.710065 | 0.467907 | 3.65471  | 0.000257 | 0.014386 |
| 55625  | ZDHHC7    | 158.3464 | 1.423509 | 0.389532 | 3.654404 | 0.000258 | 0.014386 |
| 4536   | ND2       | 1503.534 | 2.057861 | 0.562761 | 3.656724 | 0.000255 | 0.014386 |
| 643246 | MAP1LC3B  | 22.68789 | 2.252199 | 0.616515 | 3.653111 | 0.000259 | 0.014394 |
| 55829  | VIMP      | 41.28626 | 1.832865 | 0.502695 | 3.646077 | 0.000266 | 0.014727 |
| 516    | ATP5G1    | 117.0346 | 1.424419 | 0.390803 | 3.64485  | 0.000268 | 0.014731 |
| 27243  | CHMP2A    | 66.02549 | 1.781378 | 0.489162 | 3.641693 | 0.000271 | 0.014846 |
| 7097   | TLR2      | 99.28674 | 1.311596 | 0.360301 | 3.640284 | 0.000272 | 0.014861 |
| 4758   | NEU1      | 15.00352 | 2.67099  | 0.736057 | 3.62878  | 0.000285 | 0.015402 |
| 1347   | COX7A2    | 122.6615 | 1.238185 | 0.341136 | 3.629599 | 0.000284 | 0.015402 |
| 7763   | ZFAND5    | 50.04888 | 1.548588 | 0.427233 | 3.624689 | 0.000289 | 0.01558  |
| 60675  | PROK2     | 128.3671 | 2.041818 | 0.563848 | 3.621223 | 0.000293 | 0.015721 |
| 89849  | ATG16L2   | 616.8161 | 1.504854 | 0.416585 | 3.612354 | 0.000303 | 0.016198 |
| 220323 | OAF       | 44.54894 | 1.520572 | 0.42264  | 3.597795 | 0.000321 | 0.017058 |
| 10801  | 9-Sep     | 1246.556 | 1.564746 | 0.435603 | 3.59214  | 0.000328 | 0.017285 |
| 3597   | IL13RA1   | 83.84239 | 1.585786 | 0.441465 | 3.592098 | 0.000328 | 0.017285 |
| 3159   | HMGA1     | 100.0755 | 1.63876  | 0.456662 | 3.588563 | 0.000333 | 0.017447 |
| 648217 | RPL37P23  | 10.39011 | 4.037114 | 1.125803 | 3.585985 | 0.000336 | 0.017545 |
| 7454   | WAS       | 131.0982 | 1.969617 | 0.550096 | 3.5805   | 0.000343 | 0.017841 |
| 4332   | MNDA      | 211.6638 | 1.448995 | 0.404967 | 3.578056 | 0.000346 | 0.017933 |
| 2215   | FCGR3B    | 1304.475 | 2.017621 | 0.565489 | 3.567922 | 0.00036  | 0.018563 |
| 2783   | GNB2      | 138.6354 | 3.935637 | 1.104575 | 3.563031 | 0.000367 | 0.018656 |
| 2548   | GAA       | 31.12274 | 2.612056 | 0.733207 | 3.562509 | 0.000367 | 0.018656 |
| 529    | ATP6V1E1  | 134.0727 | 1.128832 | 0.316617 | 3.565288 | 0.000363 | 0.018656 |
| 4710   | NDUFB4    | 69.46392 | 1.655581 | 0.464758 | 3.562241 | 0.000368 | 0.018656 |
| 6499   | SKIV2L    | 39.00151 | 2.114264 | 0.594289 | 3.557634 | 0.000374 | 0.018908 |
| 28959  | TMEM176B  | 37.27882 | 2.889472 | 0.812696 | 3.555417 | 0.000377 | 0.01899  |
| 1E+08  | JHDM1D-A  | 11.13139 | 2.88898  | 0.815963 | 3.540578 | 0.000399 | 0.020008 |
| 79930  | DOK3      | 116.4237 | 1.665719 | 0.471087 | 3.535909 | 0.000406 | 0.020119 |
| 27240  | SIT1      | 114.9667 | 1.775399 | 0.501979 | 3.536804 | 0.000405 | 0.020119 |
| 9741   | LAPTM4A   | 286.1128 | 1.839849 | 0.520153 | 3.537131 | 0.000404 | 0.020119 |
| 6648   | SOD2      | 362.536  | 1.502226 | 0.42513  | 3.533567 | 0.00041  | 0.020216 |
| 729737 | LOC72973  | 21.59077 | 2.399798 | 0.679788 | 3.530214 | 0.000415 | 0.020392 |
| 201283 | AMZ2P1    | 8.667238 | 3.350381 | 0.949784 | 3.527518 | 0.000419 | 0.020519 |
| 678    | ZFP36L2   | 142.383  | 1.374595 | 0.390157 | 3.523182 | 0.000426 | 0.020775 |
| 5606   | MAP2K3    | 579.2222 | 1.950583 | 0.554577 | 3.517243 | 0.000436 | 0.021162 |
| 4689   | NCF4      | 96.69266 | 1.781191 | 0.507027 | 3.513009 | 0.000443 | 0.021417 |
| 5869   | RAB5B     | 185.9741 | 1.699498 | 0.484923 | 3.504675 | 0.000457 | 0.022012 |
| 6776   | STAT5A    | 127.2164 | 1.892103 | 0.540539 | 3.500399 | 0.000465 | 0.022281 |
| 27301  | APEX2     | 13.33518 | 2.574933 | 0.737553 | 3.491181 | 0.000481 | 0.022974 |
| 9673   | SLC25A44  | 92.86282 | 1.785081 | 0.511612 | 3.489132 | 0.000485 | 0.023061 |
| 1192   | CLIC1     | 874.3765 | 1.870797 | 0.536566 | 3.48661  | 0.000489 | 0.02319  |
| 2114   | ETS2      | 70.82688 | 1.49619  | 0.429524 | 3.483364 | 0.000495 | 0.023383 |
| 9919   | SEC16A    | 59.37842 | 1.398868 | 0.403024 | 3.47093  | 0.000519 | 0.02394  |
| 54541  | DDIT4     | 54.64529 | 1.623452 | 0.467468 | 3.47286  | 0.000515 | 0.02394  |
| 80198  | MUS81     | 9.872492 | 3.446993 | 0.991892 | 3.475171 | 0.000511 | 0.02394  |
| 54344  | DPM3      | 58.93453 | 1.584842 | 0.456509 | 3.471651 | 0.000517 | 0.02394  |
| 3428   | IFI16     | 237.053  | 1.208406 | 0.348026 | 3.472168 | 0.000516 | 0.02394  |
| 642969 | LOC642969 | 73.39534 | 1.316071 | 0.378737 | 3.474889 | 0.000511 | 0.02394  |
| 2219   | FCN1      | 275.4528 | 1.758764 | 0.507499 | 3.465553 | 0.000529 | 0.024242 |
| 6391   | SDHC      | 91.10145 | 1.396171 | 0.402754 | 3.466557 | 0.000527 | 0.024242 |
| 22800  | RRAS2     | 90.51448 | -1.32056 | 0.381311 | -3.46321 | 0.000534 | 0.024276 |

|          |          |          |          |          |          |          |          |
|----------|----------|----------|----------|----------|----------|----------|----------|
| 79168    | LILRA6   | 84.52999 | 2.125388 | 0.613711 | 3.463176 | 0.000534 | 0.024276 |
| 5880     | RAC2     | 267.1637 | 1.484712 | 0.428984 | 3.460997 | 0.000538 | 0.024383 |
| 1992     | SERPINB1 | 181.0101 | 1.436855 | 0.41539  | 3.459048 | 0.000542 | 0.02447  |
| 51734    | MSRB1    | 104.8493 | 1.58613  | 0.458794 | 3.457169 | 0.000546 | 0.024551 |
| 1.01E+08 | LINC0127 | 50.55298 | 1.923903 | 0.557341 | 3.451929 | 0.000557 | 0.024941 |
| 11337    | GABARAP  | 504.7989 | 1.29196  | 0.374409 | 3.450665 | 0.000559 | 0.024967 |
| 2029     | ENSA     | 57.07585 | 1.808142 | 0.527677 | 3.426605 | 0.000611 | 0.027189 |
| 84074    | QRICH2   | 13.03074 | -2.54379 | 0.742594 | -3.42554 | 0.000614 | 0.027197 |
| 338442   | HCAR2    | 41.75516 | 1.975019 | 0.577731 | 3.418576 | 0.000629 | 0.027802 |
| 5696     | PSMB8    | 67.48459 | 1.737392 | 0.509612 | 3.409245 | 0.000651 | 0.028668 |
| 7706     | TRIM25   | 141.4111 | 1.447739 | 0.425517 | 3.40231  | 0.000668 | 0.0293   |
| 133283   | EEF1A1P1 | 24.33828 | 2.354956 | 0.694003 | 3.393292 | 0.000691 | 0.030067 |
| 116071   | BATF2    | 17.67877 | 2.874738 | 0.846971 | 3.394139 | 0.000688 | 0.030067 |
| 84418    | CYSTM1   | 59.76292 | 1.604633 | 0.474013 | 3.385206 | 0.000711 | 0.030641 |
| 643224   | TUBBP5   | 13.75051 | 2.809546 | 0.829943 | 3.385227 | 0.000711 | 0.030641 |
| 57085    | AGTRAP   | 37.84391 | 1.669067 | 0.493004 | 3.385507 | 0.00071  | 0.030641 |
| 90313    | TP53I13  | 14.008   | 2.559895 | 0.756725 | 3.382862 | 0.000717 | 0.030796 |
| 25853    | DCAF12   | 571.2653 | 1.917475 | 0.567779 | 3.377149 | 0.000732 | 0.031224 |
| 4722     | NDUFS3   | 51.93495 | 1.424646 | 0.421829 | 3.377306 | 0.000732 | 0.031224 |
| 81628    | TSC22D4  | 116.4111 | 2.124906 | 0.629936 | 3.373209 | 0.000743 | 0.03149  |
| 6039     | RNASE6   | 44.21129 | 1.591086 | 0.471725 | 3.372913 | 0.000744 | 0.03149  |
| 6281     | S100A10  | 87.04217 | 1.445069 | 0.428784 | 3.370154 | 0.000751 | 0.031698 |
| 689      | BTF3     | 101.8616 | 1.381713 | 0.410472 | 3.366152 | 0.000762 | 0.031941 |
| 10423    | CDIPT    | 35.62825 | 1.690997 | 0.502289 | 3.366584 | 0.000761 | 0.031941 |
| 6810     | STX4     | 55.19143 | 1.505463 | 0.447978 | 3.360572 | 0.000778 | 0.032483 |
| 1E+08    | SIGLEC14 | 29.92983 | 2.723516 | 0.811179 | 3.357477 | 0.000787 | 0.032737 |
| 9760     | TOX      | 148.4711 | -1.05105 | 0.31335  | -3.35424 | 0.000796 | 0.033011 |
| 55330    | BLOC1S4  | 24.46621 | 1.829093 | 0.545483 | 3.353164 | 0.000799 | 0.033028 |
| 3142     | HLX      | 32.38363 | 2.114429 | 0.63081  | 3.351929 | 0.000803 | 0.033064 |
| 256586   | LYSMD2   | 14.79429 | 2.472455 | 0.737987 | 3.350268 | 0.000807 | 0.033152 |
| 10899    | JTB      | 107.8148 | 1.554036 | 0.464161 | 3.348051 | 0.000814 | 0.033262 |
| 4860     | PNP      | 16.97155 | 2.079122 | 0.621096 | 3.347507 | 0.000815 | 0.033262 |
| 710      | SERPING1 | 29.47108 | 2.415743 | 0.72218  | 3.34507  | 0.000823 | 0.033444 |
| 10491    | CRTAP    | 48.77133 | 1.464888 | 0.439003 | 3.336849 | 0.000847 | 0.034335 |
| 22919    | MAPRE1   | 45.59137 | 1.438034 | 0.431131 | 3.335488 | 0.000851 | 0.03439  |
| 11017    | SNRNP27  | 64.91572 | 1.299615 | 0.389814 | 3.333939 | 0.000856 | 0.034459 |
| 1796     | DOK1     | 33.16159 | 1.550442 | 0.465164 | 3.333107 | 0.000859 | 0.034459 |
| 26253    | CLEC4E   | 32.35315 | 2.217604 | 0.666067 | 3.3294   | 0.00087  | 0.034808 |
| 387      | RHOA     | 436.2339 | 1.159112 | 0.348245 | 3.328444 | 0.000873 | 0.034814 |
| 1084     | CEACAM3  | 55.7478  | 1.627716 | 0.489737 | 3.323652 | 0.000888 | 0.035303 |
| 3927     | LASP1    | 505.6496 | 1.258804 | 0.379656 | 3.315642 | 0.000914 | 0.036213 |
| 10636    | RGS14    | 86.80337 | 1.838741 | 0.555759 | 3.308525 | 0.000938 | 0.036811 |
| 10866    | HCP5     | 23.05526 | 1.890739 | 0.571514 | 3.3083   | 0.000939 | 0.036811 |
| 127829   | ARL8A    | 337.5862 | 1.59023  | 0.480799 | 3.307474 | 0.000941 | 0.036811 |
| 1155     | TBCB     | 90.63502 | 1.235286 | 0.373385 | 3.308347 | 0.000938 | 0.036811 |
| 2907     | GRINA    | 438.7345 | 1.614866 | 0.488665 | 3.304645 | 0.000951 | 0.037032 |
| 3561     | IL2RG    | 142.1953 | 1.588376 | 0.48074  | 3.304021 | 0.000953 | 0.037032 |
| 10928    | RALBP1   | 142.4012 | 1.092386 | 0.331745 | 3.292842 | 0.000992 | 0.038414 |
| 51246    | SHISA5   | 480.1868 | 1.33792  | 0.406451 | 3.29171  | 0.000996 | 0.038448 |
| 6929     | TCF3     | 103.9659 | 1.451315 | 0.441026 | 3.290768 | 0.000999 | 0.038456 |
| 9537     | TP53I11  | 8.834074 | 3.675616 | 1.11734  | 3.289613 | 0.001003 | 0.038494 |
| 80727    | TTYH3    | 92.21716 | 1.80301  | 0.548868 | 3.284963 | 0.00102  | 0.038941 |
| 5859     | QARS     | 33.49748 | 1.724757 | 0.525103 | 3.284607 | 0.001021 | 0.038941 |
| 51177    | PLEKHO1  | 319.2472 | 1.295753 | 0.395621 | 3.275238 | 0.001056 | 0.040007 |

|          |           |          |          |          |          |          |          |
|----------|-----------|----------|----------|----------|----------|----------|----------|
| 3689     | ITGB2     | 4087.15  | 1.68224  | 0.513507 | 3.275985 | 0.001053 | 0.040007 |
| 440375   | RAB43P1   | 21.83683 | 2.784849 | 0.850857 | 3.272994 | 0.001064 | 0.040202 |
| 552889   | ATXN7L3B  | 32.39599 | 1.678466 | 0.513136 | 3.270993 | 0.001072 | 0.040269 |
| 54470    | ARMCX6    | 31.35061 | 1.71554  | 0.524504 | 3.270788 | 0.001072 | 0.040269 |
| 5912     | RAP2B     | 65.71838 | 1.442998 | 0.441345 | 3.269548 | 0.001077 | 0.040323 |
| 80213    | TM2D3     | 42.1762  | 1.780076 | 0.544722 | 3.26786  | 0.001084 | 0.04044  |
| 2357     | FPR1      | 224.4848 | 1.666715 | 0.5104   | 3.265509 | 0.001093 | 0.040654 |
| 402117   | VWC2L     | 25.07478 | 1.703493 | 0.522676 | 3.259175 | 0.001117 | 0.041447 |
| 93621    | MRFAP1    | 55.54058 | 1.455846 | 0.44705  | 3.25656  | 0.001128 | 0.041705 |
| 646531   | YBX1P2    | 30.08017 | 2.797256 | 0.860809 | 3.249565 | 0.001156 | 0.042135 |
| 6881     | TAF10     | 10.61985 | 2.616629 | 0.804856 | 3.251053 | 0.00115  | 0.042135 |
| 79719    | AAGAB     | 82.48651 | 1.390135 | 0.42756  | 3.251322 | 0.001149 | 0.042135 |
| 79042    | TSEN34    | 106.1098 | 1.743413 | 0.536534 | 3.249397 | 0.001156 | 0.042135 |
| 706      | TSPO      | 153.5516 | 1.283971 | 0.394737 | 3.252728 | 0.001143 | 0.042135 |
| 4149     | MAX       | 378.425  | 1.299578 | 0.400207 | 3.247263 | 0.001165 | 0.042327 |
| 6164     | RPL34     | 513.2676 | 1.541572 | 0.475416 | 3.242577 | 0.001185 | 0.042526 |
| 5514     | PPP1R10   | 121.2154 | 1.092265 | 0.336768 | 3.243374 | 0.001181 | 0.042526 |
| 647087   | C7orf73   | 71.46815 | 1.398358 | 0.431137 | 3.243418 | 0.001181 | 0.042526 |
| 375      | ARF1      | 300.0852 | 1.158252 | 0.356974 | 3.244641 | 0.001176 | 0.042526 |
| 10467    | ZNHIT1    | 19.82471 | 1.883832 | 0.581195 | 3.241308 | 0.00119  | 0.042591 |
| 148932   | MOB3C     | 75.60667 | 1.776067 | 0.550255 | 3.227717 | 0.001248 | 0.04428  |
| 10964    | IFI44L    | 31.94317 | 2.033744 | 0.630015 | 3.228086 | 0.001246 | 0.04428  |
| 3930     | LBR       | 82.96377 | 1.333277 | 0.413065 | 3.227763 | 0.001248 | 0.04428  |
| 219972   | MPEG1     | 83.52419 | 1.31183  | 0.406675 | 3.225747 | 0.001256 | 0.04435  |
| 64748    | LPPR2     | 33.17018 | 1.808217 | 0.560581 | 3.225613 | 0.001257 | 0.04435  |
| 3148     | HMGB2     | 14.49978 | 2.602653 | 0.80716  | 3.224455 | 0.001262 | 0.04435  |
| 2987     | GUK1      | 225.0842 | 1.168107 | 0.362411 | 3.223154 | 0.001268 | 0.04435  |
| 126792   | B3GALT6   | 53.1774  | 1.382741 | 0.428986 | 3.223278 | 0.001267 | 0.04435  |
| 6521     | SLC4A1    | 212.3406 | 1.383251 | 0.429293 | 3.22216  | 0.001272 | 0.044378 |
| 7392     | USF2      | 243.086  | 1.458801 | 0.453124 | 3.21943  | 0.001284 | 0.044676 |
| 64231    | MS4A6A    | 117.5977 | 1.072146 | 0.33329  | 3.216853 | 0.001296 | 0.044952 |
| 283922   | LOC28392  | 50.75074 | -1.51365 | 0.471572 | -3.20981 | 0.001328 | 0.045939 |
| 6194     | RPS6      | 744.4705 | 1.882005 | 0.586845 | 3.206986 | 0.001341 | 0.046261 |
| 79798    | ARMC5     | 12.93536 | 2.679659 | 0.836664 | 3.202789 | 0.001361 | 0.046809 |
| 23558    | WBP2      | 126.7631 | 1.487721 | 0.464715 | 3.201362 | 0.001368 | 0.04691  |
| 91782    | CHMP7     | 19.9622  | 2.079215 | 0.649888 | 3.199343 | 0.001377 | 0.046977 |
| 1.05E+08 | LOC105369 | 348.5826 | -1.46079 | 0.456564 | -3.19952 | 0.001377 | 0.046977 |
| 23526    | HMHA1     | 202.5326 | 1.39626  | 0.43716  | 3.193935 | 0.001403 | 0.047734 |
| 5720     | PSME1     | 121.8684 | 1.317612 | 0.413691 | 3.185015 | 0.001447 | 0.048878 |
| 10598    | AHSA1     | 58.19537 | 1.236055 | 0.38822  | 3.183901 | 0.001453 | 0.048878 |
| 6923     | TCEB2     | 145.4398 | 1.174326 | 0.368827 | 3.183952 | 0.001453 | 0.048878 |
| 55423    | SIRPG     | 38.52948 | 1.544886 | 0.484991 | 3.185391 | 0.001446 | 0.048878 |
| 1627     | DBN1      | 9.747954 | 2.948265 | 0.926401 | 3.182495 | 0.00146  | 0.048982 |
| 3150     | HMG1      | 63.28647 | 1.562269 | 0.491726 | 3.177111 | 0.001488 | 0.049764 |
| 10975    | UQCR11    | 120.0692 | 1.256629 | 0.395689 | 3.175802 | 0.001494 | 0.049854 |
| 219285   | SAMD9L    | 99.93881 | 1.306013 | 0.411462 | 3.174081 | 0.001503 | 0.049964 |
| 170622   | COMMD6    | 49.76297 | 1.48562  | 0.46812  | 3.173586 | 0.001506 | 0.049964 |
| 23129    | PLXND1    | 30.72545 | 1.713192 | 0.540776 | 3.168023 | 0.001535 | 0.050793 |
| 729614   | FLJ37453  | 78.47701 | 1.46061  | 0.461684 | 3.163659 | 0.001558 | 0.051422 |
| 5329     | PLAUR     | 201.7488 | 1.782067 | 0.5635   | 3.162495 | 0.001564 | 0.05149  |
| 6722     | SRF       | 172.9905 | 1.441352 | 0.456075 | 3.160338 | 0.001576 | 0.051532 |
| 729683   | LOC72968  | 11.31302 | 2.336704 | 0.739482 | 3.159921 | 0.001578 | 0.051532 |
| 6432     | SRSF7     | 58.40907 | 1.68961  | 0.534452 | 3.161391 | 0.00157  | 0.051532 |
| 51728    | POLR3K    | 23.23023 | 2.056434 | 0.651068 | 3.158555 | 0.001586 | 0.051637 |

|          |           |          |          |          |          |          |          |
|----------|-----------|----------|----------|----------|----------|----------|----------|
| 50856    | CLEC4A    | 35.22684 | 1.805938 | 0.572181 | 3.156234 | 0.001598 | 0.051912 |
| 283537   | SLC46A3   | 44.1717  | 1.36312  | 0.432269 | 3.153405 | 0.001614 | 0.05228  |
| 6141     | RPL18     | 1014.372 | 1.185327 | 0.37621  | 3.150707 | 0.001629 | 0.052626 |
| 6230     | RPS25     | 105.693  | 1.493197 | 0.474261 | 3.148469 | 0.001641 | 0.052891 |
| 9445     | ITM2B     | 297.8972 | 1.209726 | 0.384905 | 3.142923 | 0.001673 | 0.053483 |
| 79641    | ROGDI     | 32.46007 | 2.012719 | 0.640247 | 3.143661 | 0.001668 | 0.053483 |
| 23218    | NBEAL2    | 82.77281 | 1.30685  | 0.41563  | 3.144259 | 0.001665 | 0.053483 |
| 284207   | METRNL    | 35.99474 | 1.532638 | 0.488293 | 3.138771 | 0.001697 | 0.054105 |
| 81876    | RAB1B     | 48.63858 | 1.833678 | 0.584751 | 3.135825 | 0.001714 | 0.05451  |
| 53635    | PTOV1     | 22.36353 | 2.040342 | 0.651483 | 3.131843 | 0.001737 | 0.055112 |
| 10285    | SMNDC1    | 27.63052 | 1.623365 | 0.519184 | 3.126762 | 0.001767 | 0.055785 |
| 56729    | RETN      | 31.27167 | 2.097375 | 0.670647 | 3.12739  | 0.001764 | 0.055785 |
| 79709    | COLGALT1  | 211.0652 | 1.161889 | 0.371692 | 3.125946 | 0.001772 | 0.055797 |
| 811      | CALR      | 123.4099 | 1.449289 | 0.463827 | 3.124632 | 0.00178  | 0.055903 |
| 1844     | DUSP2     | 10.60183 | 2.791537 | 0.895282 | 3.118054 | 0.00182  | 0.057021 |
| 79145    | CHCHD7    | 29.46862 | 1.707937 | 0.548071 | 3.116268 | 0.001832 | 0.057221 |
| 1350     | COX7C     | 231.9943 | 1.195486 | 0.384051 | 3.112835 | 0.001853 | 0.057744 |
| 972      | CD74      | 611.5516 | 1.208658 | 0.388583 | 3.110425 | 0.001868 | 0.05807  |
| 6452     | SH3BP2    | 103.329  | 1.673937 | 0.53852  | 3.108402 | 0.001881 | 0.058174 |
| 23644    | EDC4      | 26.22953 | 1.808254 | 0.581642 | 3.108878 | 0.001878 | 0.058174 |
| 90780    | PYG02     | 58.81902 | 1.325512 | 0.426659 | 3.106724 | 0.001892 | 0.058358 |
| 9535     | GMFG      | 359.678  | 1.14798  | 0.370173 | 3.101198 | 0.001927 | 0.05931  |
| 57645    | POGK      | 41.13007 | 1.410352 | 0.455054 | 3.099304 | 0.00194  | 0.059541 |
| 6280     | S100A9    | 2483.592 | 1.198241 | 0.387166 | 3.094898 | 0.001969 | 0.060282 |
| 128346   | C1orf162  | 33.22757 | 1.609662 | 0.520579 | 3.092061 | 0.001988 | 0.06071  |
| 83982    | IFI27L2   | 35.82297 | 1.581471 | 0.51183  | 3.089836 | 0.002003 | 0.060723 |
| 4051     | CYP4F3    | 9.967035 | 2.918418 | 0.94438  | 3.090301 | 0.002    | 0.060723 |
| 29801    | ZDHHC8    | 12.88738 | 2.303891 | 0.745647 | 3.089789 | 0.002003 | 0.060723 |
| 23309    | SIN3B     | 71.24625 | 1.543165 | 0.499737 | 3.087953 | 0.002015 | 0.060949 |
| 642546   | HK2P1     | 7.575175 | 3.493807 | 1.131812 | 3.086915 | 0.002022 | 0.061011 |
| 928      | CD9       | 32.37887 | 2.234486 | 0.724051 | 3.086091 | 0.002028 | 0.061021 |
| 441733   | PRKXP1    | 13.60712 | 2.297425 | 0.744609 | 3.085412 | 0.002033 | 0.061021 |
| 3185     | HNRNPF    | 119.2989 | 1.162961 | 0.377191 | 3.083217 | 0.002048 | 0.061174 |
| 1831     | TSC22D3   | 673.6851 | 1.209568 | 0.392223 | 3.083879 | 0.002043 | 0.061174 |
| 1.05E+08 | LOC105378 | 27.85335 | 1.534106 | 0.498218 | 3.079186 | 0.002076 | 0.061707 |
| 2867     | FFAR2     | 197.8228 | 1.967745 | 0.638899 | 3.079897 | 0.002071 | 0.061707 |
| 3003     | GZMK      | 36.14815 | 1.560388 | 0.507376 | 3.075407 | 0.002102 | 0.062083 |
| 729402   | RPL21P16  | 95.46862 | 1.475312 | 0.479553 | 3.076432 | 0.002095 | 0.062083 |
| 116540   | MRPL53    | 55.31382 | 1.455159 | 0.473189 | 3.07522  | 0.002103 | 0.062083 |
| 11027    | LILRA2    | 123.2825 | 1.526168 | 0.496482 | 3.073963 | 0.002112 | 0.062101 |
| 7841     | MOGS      | 45.14715 | 1.561225 | 0.50793  | 3.073703 | 0.002114 | 0.062101 |
| 27230    | SERP1     | 133.1767 | 1.081983 | 0.352335 | 3.070896 | 0.002134 | 0.062281 |
| 84750    | FUT10     | 37.43725 | -1.37226 | 0.446686 | -3.07209 | 0.002126 | 0.062281 |
| 115207   | KCTD12    | 26.02694 | 1.603017 | 0.522036 | 3.070702 | 0.002136 | 0.062281 |
| 283897   | C16orf54  | 99.99406 | 1.835326 | 0.598996 | 3.064002 | 0.002184 | 0.063489 |
| 4513     | COX2      | 1002.691 | 1.252764 | 0.408926 | 3.063544 | 0.002187 | 0.063489 |
| 6217     | RPS16     | 729.9918 | 1.308378 | 0.427481 | 3.060672 | 0.002208 | 0.06395  |
| 1.02E+08 | LOC101928 | 128.7446 | -1.10329 | 0.361201 | -3.05451 | 0.002254 | 0.065124 |
| 55652    | SLC48A1   | 30.35982 | 1.579321 | 0.517291 | 3.053062 | 0.002265 | 0.065187 |
| 58526    | MID1IP1   | 26.86367 | 2.345467 | 0.768296 | 3.052815 | 0.002267 | 0.065187 |
| 51490    | C9orf114  | 40.06232 | -1.41383 | 0.463487 | -3.05042 | 0.002285 | 0.065556 |
| 6737     | TRIM21    | 15.05534 | 2.360555 | 0.774359 | 3.048398 | 0.002301 | 0.065691 |
| 6142     | RPL18A    | 286.6691 | 1.306781 | 0.428652 | 3.048581 | 0.002299 | 0.065691 |
| 64110    | MAGEF1    | 12.65144 | 2.678584 | 0.879919 | 3.044127 | 0.002334 | 0.066477 |



|        |          |          |          |          |          |          |          |
|--------|----------|----------|----------|----------|----------|----------|----------|
| 84826  | SFT2D3   | 13.55869 | 2.289593 | 0.753099 | 3.040228 | 0.002364 | 0.067188 |
| 80774  | LIMD2    | 157.7874 | 1.515746 | 0.498828 | 3.038615 | 0.002377 | 0.067392 |
| 6282   | S100A11  | 100.4319 | 1.652098 | 0.544362 | 3.034923 | 0.002406 | 0.067859 |
| 54997  | TESC     | 147.8429 | 1.278437 | 0.421499 | 3.033071 | 0.002421 | 0.067859 |
| 64386  | MMP25    | 294.9982 | 1.707882 | 0.563042 | 3.033312 | 0.002419 | 0.067859 |
| 64859  | NABP1    | 94.61755 | 1.474069 | 0.485813 | 3.034233 | 0.002411 | 0.067859 |
| 967    | CD63     | 571.1914 | 1.210098 | 0.399157 | 3.031631 | 0.002432 | 0.068029 |
| 2210   | FCGR1B   | 22.44636 | 2.093147 | 0.690862 | 3.029763 | 0.002447 | 0.068295 |
| 79180  | EFHD2    | 195.0988 | 1.587876 | 0.525346 | 3.022533 | 0.002507 | 0.069789 |
| 3958   | LGALS3   | 23.50949 | 1.892321 | 0.626971 | 3.018197 | 0.002543 | 0.070636 |
| 59274  | MESDC1   | 20.58333 | 2.009584 | 0.667021 | 3.012773 | 0.002589 | 0.071586 |
| 1E+08  | LOC10013 | 27.32052 | 2.206523 | 0.732981 | 3.010342 | 0.00261  | 0.071678 |
| 7458   | EIF4H    | 80.20303 | 1.262154 | 0.419205 | 3.010825 | 0.002605 | 0.071678 |
| 118472 | ZNF511   | 9.993182 | 2.597071 | 0.86237  | 3.011551 | 0.002599 | 0.071678 |
| 10695  | CNPY3    | 57.59473 | 1.414575 | 0.470668 | 3.005462 | 0.002652 | 0.072192 |
| 23586  | DDX58    | 194.5946 | 1.220729 | 0.405997 | 3.006744 | 0.002641 | 0.072192 |
| 7316   | UBC      | 584.6326 | 1.131565 | 0.376472 | 3.005711 | 0.00265  | 0.072192 |
| 6135   | RPL11    | 488.0668 | 1.379026 | 0.458573 | 3.007213 | 0.002637 | 0.072192 |
| 54556  | ING3     | 53.01333 | 1.242329 | 0.414024 | 3.000617 | 0.002694 | 0.073188 |
| 25924  | MYRIP    | 29.16777 | -1.50104 | 0.500527 | -2.99892 | 0.002709 | 0.073435 |
| 5002   | SLC22A18 | 20.77049 | 1.923143 | 0.642233 | 2.994464 | 0.002749 | 0.074162 |
| 56993  | TOMM22   | 63.83333 | 1.286851 | 0.429712 | 2.994686 | 0.002747 | 0.074162 |
| 2771   | GNAI2    | 663.2501 | 1.693752 | 0.565734 | 2.993902 | 0.002754 | 0.074162 |
| 2271   | FH       | 11.14801 | 2.72625  | 0.911456 | 2.991093 | 0.00278  | 0.074684 |
| 51191  | HERC5    | 35.38598 | 1.749578 | 0.585217 | 2.989625 | 0.002793 | 0.07488  |
| 79073  | TMEM109  | 111.9879 | 1.683474 | 0.563368 | 2.98823  | 0.002806 | 0.075058 |
| 5382   | PMS2P4   | 44.38388 | -1.24795 | 0.418737 | -2.98028 | 0.00288  | 0.076867 |
| 10018  | BCL2L11  | 20.79352 | 1.677542 | 0.56453  | 2.971576 | 0.002963 | 0.078908 |
| 116138 | KLHDC3   | 22.32613 | 1.86174  | 0.627689 | 2.966022 | 0.003017 | 0.079834 |
| 388588 | SMIM1    | 23.94913 | 1.843261 | 0.621239 | 2.967071 | 0.003007 | 0.079834 |
| 23625  | FAM89B   | 59.82668 | 1.292557 | 0.435792 | 2.965998 | 0.003017 | 0.079834 |
| 1396   | CRIP1    | 275.3941 | 1.226342 | 0.413673 | 2.964521 | 0.003032 | 0.080046 |
| 6144   | RPL21    | 297.4494 | 1.50964  | 0.509396 | 2.963588 | 0.003041 | 0.080117 |
| 25793  | FBX07    | 393.6772 | 1.337814 | 0.45153  | 2.962848 | 0.003048 | 0.080138 |
| 79872  | CBLL1    | 27.01859 | 1.461925 | 0.493592 | 2.961807 | 0.003058 | 0.080237 |
| 646949 | RPL23P6  | 30.88956 | 1.504453 | 0.509187 | 2.954618 | 0.003131 | 0.081781 |
| 7295   | TXN      | 21.28138 | 2.218439 | 0.750722 | 2.955072 | 0.003126 | 0.081781 |
| 9467   | SH3BP5   | 81.12565 | -1.17311 | 0.39715  | -2.95383 | 0.003139 | 0.081816 |
| 6155   | RPL27    | 307.4878 | 1.610121 | 0.546054 | 2.94865  | 0.003192 | 0.083024 |
| 116151 | FAM210B  | 548.2295 | 1.785893 | 0.606142 | 2.946326 | 0.003216 | 0.083473 |
| 271    | AMPD2    | 50.63813 | 1.469674 | 0.499381 | 2.942992 | 0.003251 | 0.083926 |
| 23234  | DNAJC9   | 12.97056 | 2.045306 | 0.695045 | 2.942694 | 0.003254 | 0.083926 |
| 3021   | H3F3B    | 671.2344 | 1.17069  | 0.397756 | 2.943233 | 0.003248 | 0.083926 |
| 975    | CD81     | 107.4505 | 1.279799 | 0.435386 | 2.93946  | 0.003288 | 0.084452 |
| 9592   | IER2     | 816.794  | 1.421683 | 0.483645 | 2.939516 | 0.003287 | 0.084452 |
| 54458  | PRR13    | 396.6852 | 1.158297 | 0.394407 | 2.936809 | 0.003316 | 0.085    |
| 515    | ATP5F1   | 76.09416 | 1.186932 | 0.404295 | 2.935804 | 0.003327 | 0.085098 |
| 2214   | FCGR3A   | 240.8527 | 1.484487 | 0.506533 | 2.930682 | 0.003382 | 0.086334 |
| 26277  | TINF2    | 37.29398 | 1.824397 | 0.622921 | 2.928776 | 0.003403 | 0.086685 |
| 4874   | NPM1P5   | 15.4831  | 2.763174 | 0.944144 | 2.926644 | 0.003426 | 0.0871   |
| 128646 | SIRPD    | 62.41583 | 1.361319 | 0.466088 | 2.920737 | 0.003492 | 0.088585 |
| 53827  | FXYS5    | 75.56905 | 1.323177 | 0.453162 | 2.919877 | 0.003502 | 0.088647 |
| 2994   | GYPB     | 10.50218 | 2.261394 | 0.775847 | 2.914742 | 0.00356  | 0.089933 |
| 4673   | NAP1L1   | 243.4017 | 1.2142   | 0.416779 | 2.913293 | 0.003576 | 0.090166 |

|                 |          |          |          |          |          |          |
|-----------------|----------|----------|----------|----------|----------|----------|
| 4610 MYCL       | 24.89698 | 1.839635 | 0.631643 | 2.912461 | 0.003586 | 0.090221 |
| 10945 KDELR1    | 203.263  | 1.583449 | 0.54421  | 2.909628 | 0.003619 | 0.090857 |
| 170954 PPP1R18  | 318.3451 | 1.024344 | 0.352307 | 2.907536 | 0.003643 | 0.09128  |
| 4061 LY6E       | 58.03834 | 2.006703 | 0.690521 | 2.906073 | 0.00366  | 0.091521 |
| 81873 ARPC5L    | 65.31714 | 1.131721 | 0.390362 | 2.89916  | 0.003742 | 0.092756 |
| 22821 RASA3     | 183.9334 | 1.13728  | 0.392341 | 2.898702 | 0.003747 | 0.092756 |
| 10289 EIF1B     | 20.51463 | 1.798735 | 0.620525 | 2.898732 | 0.003747 | 0.092756 |
| 5162 PDHB       | 20.96779 | 1.821423 | 0.627949 | 2.900592 | 0.003725 | 0.092756 |
| 79713 IGFLR1    | 72.97894 | 1.366963 | 0.471742 | 2.89769  | 0.003759 | 0.092869 |
| 5439 POLR2J     | 32.85192 | 1.659787 | 0.574109 | 2.891066 | 0.003839 | 0.093985 |
| 9588 PRDX6      | 79.78988 | 1.341705 | 0.463996 | 2.891629 | 0.003833 | 0.093985 |
| 602 BCL3        | 156.5688 | 1.886755 | 0.652473 | 2.891698 | 0.003832 | 0.093985 |
| 116092 DNTTIP1  | 77.45025 | 1.149199 | 0.397227 | 2.893054 | 0.003815 | 0.093985 |
| 1154 CISH       | 26.9621  | 1.638578 | 0.566826 | 2.890796 | 0.003843 | 0.093985 |
| 7106 TSPAN4     | 14.77236 | 2.159948 | 0.747531 | 2.889443 | 0.003859 | 0.094203 |
| 9825 SPATA2     | 7.439241 | 2.816237 | 0.975566 | 2.886773 | 0.003892 | 0.094629 |
| 10952 SEC61B    | 55.92331 | 1.103585 | 0.382761 | 2.883221 | 0.003936 | 0.094999 |
| 149986 LSM14B   | 31.20913 | 1.614144 | 0.559981 | 2.882498 | 0.003945 | 0.094999 |
| 80830 APOL6     | 253.0639 | 1.04634  | 0.363005 | 2.882443 | 0.003946 | 0.094999 |
| 4615 MYD88      | 33.75445 | 3.94947  | 1.369608 | 2.883651 | 0.003931 | 0.094999 |
| 3662 IRF4       | 17.39237 | 1.765636 | 0.613542 | 2.877774 | 0.004005 | 0.095295 |
| 7979 SHFM1      | 37.02868 | 1.499846 | 0.521063 | 2.878436 | 0.003997 | 0.095295 |
| 5250 SLC25A3    | 76.23674 | 1.231403 | 0.427779 | 2.878599 | 0.003994 | 0.095295 |
| 1E+08 NPIP5     | 324.6729 | -1.12458 | 0.390403 | -2.88056 | 0.00397  | 0.095295 |
| 23207 PLEKHM2   | 261.0128 | 1.284537 | 0.446131 | 2.879285 | 0.003986 | 0.095295 |
| 339344 MYPOP    | 26.71284 | 1.478178 | 0.513604 | 2.878049 | 0.004001 | 0.095295 |
| 127687 Clorf122 | 16.24007 | 1.738693 | 0.605126 | 2.873273 | 0.004062 | 0.096105 |
| 10235 RASGRP2   | 597.92   | 1.346571 | 0.468577 | 2.873744 | 0.004056 | 0.096105 |
| 9121 SLC16A5    | 17.61439 | 1.712078 | 0.595848 | 2.873346 | 0.004061 | 0.096105 |
| 91543 RSAD2     | 32.30615 | 1.554884 | 0.541345 | 2.872262 | 0.004075 | 0.096228 |
| 1E+08 MTRNR2L9  | 11.58768 | -2.99918 | 1.044435 | -2.87158 | 0.004084 | 0.09625  |
| 83541 FAM110A   | 62.27274 | 1.447483 | 0.504725 | 2.867863 | 0.004133 | 0.097202 |
| 7873 MANF       | 22.0527  | 1.639293 | 0.57223  | 2.864746 | 0.004173 | 0.097976 |
| 8349 HIST2H2BI  | 25.53285 | 2.125135 | 0.743071 | 2.859936 | 0.004237 | 0.099161 |
| 348094 ANKDD1A  | 111.3364 | 1.431535 | 0.500585 | 2.859726 | 0.00424  | 0.099161 |
| 3134 HLA-F      | 99.38478 | 1.439839 | 0.503827 | 2.857804 | 0.004266 | 0.099447 |
| 1731 1-Sep      | 101.5877 | 1.154845 | 0.40413  | 2.857605 | 0.004269 | 0.099447 |
| 25983 NGDN      | 44.51521 | 1.28471  | 0.449882 | 2.855661 | 0.004295 | 0.099869 |
| 147040 KCTD11   | 71.08291 | 1.61879  | 0.567142 | 2.854293 | 0.004313 | 0.10011  |
| 6283 S100A12    | 69.50073 | 1.276842 | 0.44757  | 2.852831 | 0.004333 | 0.100382 |
| 3112 HLA-DOB    | 10.13508 | 2.277106 | 0.798566 | 2.851495 | 0.004351 | 0.100615 |
| 85365 ALG2      | 12.2148  | 2.052342 | 0.72009  | 2.85012  | 0.00437  | 0.100861 |
| 3045 HBD        | 22.51611 | 1.837875 | 0.64524  | 2.848357 | 0.004395 | 0.101108 |
| 65108 MARCKSL1  | 9.261605 | 2.523523 | 0.887148 | 2.844532 | 0.004448 | 0.102072 |
| 6660 SOX5       | 72.5116  | -1.06959 | 0.376334 | -2.84214 | 0.004481 | 0.102647 |
| 56911 MAP3K7CL  | 53.66179 | 1.266229 | 0.445612 | 2.841552 | 0.004489 | 0.102647 |
| 23401 FRAT2     | 126.5003 | 1.22457  | 0.431051 | 2.840891 | 0.004499 | 0.102669 |
| 3557 IL1RN      | 57.8089  | 1.404996 | 0.494724 | 2.839961 | 0.004512 | 0.102778 |
| 128977 C22orf39 | 49.11472 | 1.249715 | 0.440826 | 2.834942 | 0.004583 | 0.104213 |
| 3304 HSPA1B     | 8.632775 | 2.738189 | 0.966396 | 2.833402 | 0.004606 | 0.104523 |
| 10768 AHCYL1    | 113.7743 | 1.015983 | 0.358896 | 2.830856 | 0.004642 | 0.10497  |
| 8531 YBX3       | 213.2546 | 1.546868 | 0.546342 | 2.831316 | 0.004636 | 0.10497  |
| 51759 C9orf78   | 177.8267 | 1.370504 | 0.484955 | 2.826042 | 0.004713 | 0.106365 |
| 5095 PCCA       | 74.69637 | -1.15774 | 0.409896 | -2.82447 | 0.004736 | 0.106694 |

|                   |          |          |          |          |          |          |
|-------------------|----------|----------|----------|----------|----------|----------|
| 6513 SLC2A1       | 28.92406 | 1.461575 | 0.518814 | 2.817144 | 0.004845 | 0.108957 |
| 24138 IFIT5       | 11.27839 | 2.232698 | 0.792852 | 2.816033 | 0.004862 | 0.109134 |
| 9789 SPCS2        | 67.42359 | 1.240282 | 0.440796 | 2.813734 | 0.004897 | 0.109717 |
| 90864 SPSB3       | 65.82566 | 1.280547 | 0.455413 | 2.811835 | 0.004926 | 0.109966 |
| 84836 ABHD14B     | 57.41475 | 1.700104 | 0.604573 | 2.812076 | 0.004922 | 0.109966 |
| 6187 RPS2         | 790.8392 | 1.109835 | 0.395259 | 2.807865 | 0.004987 | 0.111129 |
| 119016 AGAP4      | 108.0061 | -1.26723 | 0.451721 | -2.80533 | 0.005026 | 0.111678 |
| 353 APRT          | 69.4926  | 1.312914 | 0.468044 | 2.805108 | 0.00503  | 0.111678 |
| 6478 SIAH2        | 96.57891 | 1.315837 | 0.469492 | 2.802683 | 0.005068 | 0.111914 |
| 132720 C4orf32    | 22.38505 | 1.508876 | 0.538261 | 2.803242 | 0.005059 | 0.111914 |
| 6500 SKP1         | 106.2516 | 1.073206 | 0.383071 | 2.801581 | 0.005085 | 0.112095 |
| 126003 TRAPPC5    | 113.4324 | 1.023344 | 0.365371 | 2.800835 | 0.005097 | 0.112153 |
| 2268 FGR          | 668.6999 | 1.262398 | 0.451839 | 2.79391  | 0.005207 | 0.114378 |
| 55312 RFK         | 11.22268 | 2.304712 | 0.82535  | 2.792407 | 0.005232 | 0.114549 |
| 1727 CYB5R3       | 111.3254 | 1.282168 | 0.459184 | 2.792274 | 0.005234 | 0.114549 |
| 83606 GUCD1       | 203.1346 | 1.271231 | 0.45598  | 2.787911 | 0.005305 | 0.11569  |
| 11313 LYPLA2      | 173.6569 | 1.778918 | 0.638735 | 2.785065 | 0.005352 | 0.116504 |
| 64319 FBRS        | 55.5902  | 1.768573 | 0.635286 | 2.7839   | 0.005371 | 0.116678 |
| 7263 TST          | 26.49044 | 1.40788  | 0.505807 | 2.783433 | 0.005379 | 0.116678 |
| 1.01E+08 SPDYE11  | 8.834804 | -2.49335 | 0.898439 | -2.77521 | 0.005517 | 0.119249 |
| 1.02E+08 LOC10192 | 12.55947 | 1.946757 | 0.702468 | 2.771309 | 0.005583 | 0.120474 |
| 27069 GHITM       | 42.61752 | 1.291698 | 0.466455 | 2.769179 | 0.00562  | 0.121052 |
| 51690 LSM7        | 53.9692  | 1.262249 | 0.455977 | 2.768229 | 0.005636 | 0.121193 |
| 27113 BBC3        | 224.3808 | 1.419659 | 0.513048 | 2.767108 | 0.005656 | 0.121398 |
| 51094 ADIPOR1     | 65.8556  | 1.273262 | 0.46046  | 2.765197 | 0.005689 | 0.121898 |
| 9976 CLEC2B       | 31.97248 | 1.387271 | 0.501948 | 2.763774 | 0.005714 | 0.121946 |
| 1650 DDOST        | 42.19186 | 1.254759 | 0.453925 | 2.764243 | 0.005706 | 0.121946 |
| 10498 CARM1       | 38.5232  | 1.402327 | 0.50931  | 2.753387 | 0.005898 | 0.125508 |
| 10399 GNB2L1      | 370.4797 | 1.120969 | 0.407549 | 2.750511 | 0.00595  | 0.126396 |
| 29015 SLC43A3     | 13.10018 | 1.965229 | 0.715092 | 2.748218 | 0.005992 | 0.127064 |
| 1051 CEBPB        | 250.2158 | 1.427481 | 0.519533 | 2.747621 | 0.006003 | 0.127076 |
| 4716 NDUFB10      | 36.97729 | 1.308555 | 0.47658  | 2.745718 | 0.006038 | 0.127376 |
| 5199 CFP          | 145.9477 | 1.012726 | 0.36933  | 2.74206  | 0.006106 | 0.128582 |
| 53339 BTBD1       | 67.44371 | -1.09889 | 0.401055 | -2.73998 | 0.006144 | 0.128955 |
| 124446 TMEM219    | 82.01293 | 1.106803 | 0.403919 | 2.740161 | 0.006141 | 0.128955 |
| 5045 FURIN        | 205.6718 | 1.207483 | 0.440864 | 2.738902 | 0.006164 | 0.129159 |
| 643909 SPDYE9P    | 9.58112  | -2.40901 | 0.882149 | -2.73084 | 0.006317 | 0.132138 |
| 901 CCNG2         | 16.97848 | 1.680192 | 0.61646  | 2.725548 | 0.006419 | 0.133817 |
| 8462 KLF11        | 14.0065  | 1.83693  | 0.673829 | 2.726108 | 0.006409 | 0.133817 |
| 65095 KRI1        | 27.9889  | -1.39662 | 0.51281  | -2.72346 | 0.00646  | 0.134438 |
| 9349 RPL23        | 234.6538 | 1.330585 | 0.488864 | 2.721791 | 0.006493 | 0.13489  |
| 83855 KLF16       | 9.870594 | 2.520863 | 0.927017 | 2.719327 | 0.006541 | 0.135441 |
| 54732 TMED9       | 626.6886 | 1.022867 | 0.376393 | 2.717548 | 0.006577 | 0.135639 |
| 6837 MED22        | 24.42692 | 2.011253 | 0.739943 | 2.71812  | 0.006565 | 0.135639 |
| 2002 ELK1         | 23.93078 | 1.830613 | 0.67372  | 2.717173 | 0.006584 | 0.135639 |
| 23787 MTCH1       | 84.6979  | 1.091159 | 0.402067 | 2.713877 | 0.00665  | 0.136538 |
| 79803 HPS6        | 11.88548 | 2.120157 | 0.782033 | 2.711083 | 0.006706 | 0.137464 |
| 51561 IL23A       | 17.40836 | 1.739702 | 0.642464 | 2.707858 | 0.006772 | 0.138532 |
| 84266 ALKBH7      | 31.32    | 1.537702 | 0.56796  | 2.707411 | 0.006781 | 0.138532 |
| 79143 MBOAT7      | 475.3788 | 1.345026 | 0.496957 | 2.706522 | 0.006799 | 0.138672 |
| 10969 EBNA1BP2    | 9.984465 | 2.333194 | 0.862706 | 2.704507 | 0.006841 | 0.139054 |
| 4553 TRNA         | 45.52074 | -1.60762 | 0.594379 | -2.7047  | 0.006837 | 0.139054 |
| 22928 SEPHS2      | 22.75056 | 1.487048 | 0.550297 | 2.702263 | 0.006887 | 0.139534 |
| 6237 RRAS         | 17.76807 | 1.821799 | 0.674051 | 2.702762 | 0.006877 | 0.139534 |

|          |           |          |          |          |          |          |          |
|----------|-----------|----------|----------|----------|----------|----------|----------|
| 6742     | SSBP1     | 71.03765 | 1.171846 | 0.434063 | 2.699713 | 0.00694  | 0.140376 |
| 1.02E+08 | LOC101927 | 9.99449  | -2.10608 | 0.780383 | -2.69878 | 0.006959 | 0.14053  |
| 4508     | ATP6      | 2050.541 | 1.570263 | 0.581955 | 2.698255 | 0.00697  | 0.14053  |
| 6622     | SNCA      | 83.93977 | 1.475244 | 0.547015 | 2.696899 | 0.006999 | 0.140872 |
| 2286     | FKBP2     | 101.4607 | 1.199186 | 0.445423 | 2.692242 | 0.007097 | 0.142155 |
| 65244    | SPATS2    | 58.83621 | -1.016   | 0.377377 | -2.69226 | 0.007097 | 0.142155 |
| 10673    | TNFSF13B  | 112.1487 | 1.469185 | 0.545971 | 2.690958 | 0.007125 | 0.142239 |
| 81618    | ITM2C     | 8.343816 | 2.306028 | 0.856954 | 2.690959 | 0.007125 | 0.142239 |
| 1475     | CSTA      | 99.79458 | 1.295685 | 0.481756 | 2.689502 | 0.007156 | 0.14263  |
| 2995     | GYPC      | 3466.572 | 1.257735 | 0.467774 | 2.688769 | 0.007172 | 0.142711 |
| 2752     | GLUL      | 92.53895 | 1.265965 | 0.47136  | 2.685771 | 0.007236 | 0.143533 |
| 8482     | SEMA7A    | 10.07218 | 2.094593 | 0.779852 | 2.685885 | 0.007234 | 0.143533 |
| 91056    | AP5B1     | 81.64757 | 1.489839 | 0.555244 | 2.683213 | 0.007292 | 0.144402 |
| 55585    | UBE2Q1    | 36.48371 | 1.309152 | 0.488515 | 2.679861 | 0.007365 | 0.145387 |
| 2355     | FOSL2     | 127.0199 | 1.093481 | 0.408133 | 2.679226 | 0.007379 | 0.145429 |
| 23640    | HSPBP1    | 31.65399 | 1.362968 | 0.50884  | 2.678577 | 0.007394 | 0.145478 |
| 6286     | S100P     | 117.2502 | 1.257239 | 0.46989  | 2.675601 | 0.00746  | 0.146074 |
| 56951    | C5orf15   | 28.14053 | 1.290796 | 0.482379 | 2.675897 | 0.007453 | 0.146074 |
| 64407    | RGS18     | 37.23154 | 1.284172 | 0.480158 | 2.674475 | 0.007485 | 0.146332 |
| 4084     | MXD1      | 602.0686 | 1.076476 | 0.402817 | 2.672372 | 0.007532 | 0.146593 |
| 58527    | ABRACL    | 128.1849 | 1.225847 | 0.459385 | 2.668453 | 0.00762  | 0.148038 |
| 1104     | RCC1      | 41.81839 | 1.139443 | 0.427361 | 2.666231 | 0.007671 | 0.148785 |
| 23229    | ARHGEF9   | 41.3622  | 1.126019 | 0.422532 | 2.664929 | 0.0077   | 0.149127 |
| 25948    | KBTBD2    | 102.0362 | 1.002977 | 0.37664  | 2.662958 | 0.007746 | 0.149705 |
| 48       | ACO1      | 84.29284 | 1.12521  | 0.422653 | 2.662255 | 0.007762 | 0.149705 |
| 388436   | LOC388436 | 95.45825 | 1.420156 | 0.533484 | 2.662038 | 0.007767 | 0.149705 |
| 81847    | RNF146    | 30.84773 | 1.227438 | 0.461681 | 2.658629 | 0.007846 | 0.150755 |
| 729230   | CCR2      | 53.36043 | 1.399087 | 0.526618 | 2.656742 | 0.00789  | 0.151365 |
| 10869    | USP19     | 29.18547 | 1.634936 | 0.616251 | 2.653036 | 0.007977 | 0.152436 |
| 115286   | SLC25A26  | 75.42457 | -1.01389 | 0.382199 | -2.65278 | 0.007983 | 0.152436 |
| 10008    | KCNE3     | 95.1386  | 1.213928 | 0.457699 | 2.65224  | 0.007996 | 0.152445 |
| 6227     | RPS21     | 1980.253 | 1.399089 | 0.527977 | 2.649904 | 0.008051 | 0.153265 |
| 51258    | MRPL51    | 32.45345 | 1.376786 | 0.520168 | 2.646812 | 0.008125 | 0.154434 |
| 441168   | FAM26F    | 14.11914 | 2.045732 | 0.773591 | 2.644462 | 0.008182 | 0.15527  |
| 1.05E+08 | LOC105372 | 23.54588 | -1.7034  | 0.644329 | -2.64367 | 0.008201 | 0.155392 |
| 352961   | HCG26     | 18.42775 | 1.859072 | 0.70393  | 2.640991 | 0.008266 | 0.15629  |
| 11024    | LILRA1    | 23.53981 | 1.42785  | 0.540713 | 2.640679 | 0.008274 | 0.15629  |
| 513      | ATP5D     | 28.49832 | 1.336535 | 0.506355 | 2.63952  | 0.008302 | 0.156344 |
| 1984     | EIF5A     | 50.98603 | 1.083967 | 0.410921 | 2.637898 | 0.008342 | 0.156853 |
| 646309   | NAMPTP1   | 19.17793 | 1.653163 | 0.626888 | 2.637096 | 0.008362 | 0.156984 |
| 11333    | PDAP1     | 79.52891 | 1.065963 | 0.404425 | 2.635753 | 0.008395 | 0.157253 |
| 83596    | BCL2L12   | 30.2783  | 1.458722 | 0.553494 | 2.63548  | 0.008402 | 0.157253 |
| 55066    | PDPR      | 58.75817 | -1.13991 | 0.432613 | -2.63494 | 0.008415 | 0.157262 |
| 7450     | VWF       | 11.02988 | -1.97378 | 0.749403 | -2.6338  | 0.008444 | 0.157554 |
| 3276     | PRMT1     | 194.6772 | 1.598003 | 0.607313 | 2.631266 | 0.008507 | 0.158251 |
| 4706     | NDUFAB1   | 49.04014 | 1.274587 | 0.485192 | 2.626976 | 0.008615 | 0.159535 |
| 2010     | EMD       | 230.0518 | 1.044401 | 0.397764 | 2.625676 | 0.008648 | 0.159904 |
| 957      | ENTPD5    | 24.86526 | -1.32244 | 0.503914 | -2.62434 | 0.008682 | 0.160291 |
| 1642     | DBB1      | 142.2388 | 1.131085 | 0.431206 | 2.62307  | 0.008714 | 0.160408 |
| 1.01E+08 | SNHG19    | 41.67931 | 1.15369  | 0.439751 | 2.623508 | 0.008703 | 0.160408 |
| 2926     | GRSF1     | 52.62465 | 1.051443 | 0.40102  | 2.621923 | 0.008744 | 0.160708 |
| 140807   | KRT72     | 8.404788 | 2.803739 | 1.069602 | 2.621292 | 0.00876  | 0.160765 |
| 84335    | AKT1S1    | 97.03161 | 1.526295 | 0.582554 | 2.620006 | 0.008793 | 0.161132 |
| 506      | ATP5B     | 109.518  | 1.025739 | 0.39158  | 2.61949  | 0.008806 | 0.161135 |

|          |           |          |          |          |          |          |          |
|----------|-----------|----------|----------|----------|----------|----------|----------|
| 91869    | RFT1      | 45.77083 | 1.146657 | 0.438454 | 2.615229 | 0.008917 | 0.162675 |
| 8761     | PABPC4    | 51.15161 | 1.148455 | 0.439366 | 2.61389  | 0.008952 | 0.16283  |
| 274      | BIN1      | 55.06003 | 1.418282 | 0.542527 | 2.614213 | 0.008943 | 0.16283  |
| 221491   | C6orf1    | 26.36834 | 1.638284 | 0.627042 | 2.612717 | 0.008983 | 0.162876 |
| 2969     | GTF2I     | 267.3214 | 1.019399 | 0.390303 | 2.611814 | 0.009006 | 0.162876 |
| 6218     | RPS17     | 738.155  | 1.312619 | 0.502663 | 2.611329 | 0.009019 | 0.162876 |
| 55911    | APOBR     | 68.21606 | 1.542968 | 0.591115 | 2.610266 | 0.009047 | 0.162876 |
| 9454     | HOMER3    | 38.85283 | 1.478921 | 0.566568 | 2.610314 | 0.009046 | 0.162876 |
| 4697     | NDUFA4    | 27.2426  | 1.747819 | 0.670799 | 2.605577 | 0.009172 | 0.16464  |
| 8535     | CBX4      | 104.0594 | 1.132732 | 0.434723 | 2.605643 | 0.00917  | 0.16464  |
| 1455     | CSNK1G2   | 143.7377 | 1.050667 | 0.403667 | 2.602806 | 0.009246 | 0.165492 |
| 5976     | UPF1      | 82.90714 | 1.273862 | 0.489412 | 2.602841 | 0.009245 | 0.165492 |
| 6156     | RPL30     | 518.2227 | 1.312811 | 0.50537  | 2.597724 | 0.009384 | 0.167717 |
| 6628     | SNRPB     | 57.6185  | 1.407096 | 0.541924 | 2.596484 | 0.009418 | 0.168079 |
| 113829   | SLC35A4   | 17.12262 | 1.580983 | 0.609524 | 2.593799 | 0.009492 | 0.168468 |
| 8031     | NCOA4     | 330.2579 | 1.031328 | 0.397983 | 2.591387 | 0.009559 | 0.168468 |
| 51019    | CCDC53    | 75.64392 | 1.003485 | 0.387009 | 2.592923 | 0.009516 | 0.168468 |
| 55647    | RAB20     | 44.05918 | 1.251698 | 0.482452 | 2.594453 | 0.009474 | 0.168468 |
| 80344    | DCAF11    | 186.9012 | 1.498036 | 0.577595 | 2.593574 | 0.009498 | 0.168468 |
| 1.02E+08 | LOC101927 | 56.57225 | 1.273419 | 0.491277 | 2.592057 | 0.00954  | 0.168468 |
| 4538     | ND4       | 1304.979 | 1.266144 | 0.488628 | 2.591221 | 0.009564 | 0.168468 |
| 84243    | ZDHHC18   | 106.8767 | 1.15406  | 0.445272 | 2.591807 | 0.009547 | 0.168468 |
| 2352     | FOLR3     | 13.40069 | 1.827989 | 0.706082 | 2.58892  | 0.009628 | 0.169354 |
| 24139    | EML2      | 329.7604 | 1.027035 | 0.396824 | 2.588138 | 0.00965  | 0.169497 |
| 1.05E+08 | LOC105374 | 7.593417 | 2.277796 | 0.881487 | 2.584038 | 0.009765 | 0.17128  |
| 11151    | CORO1A    | 1032.703 | 1.094714 | 0.423906 | 2.582447 | 0.00981  | 0.171826 |
| 4296     | MAP3K11   | 119.1441 | 1.611037 | 0.624455 | 2.57991  | 0.009883 | 0.172847 |
| 284821   | RPL13AP7  | 44.59724 | 1.197819 | 0.464654 | 2.57787  | 0.009941 | 0.173377 |
| 129607   | CMPK2     | 25.13967 | 1.478904 | 0.573659 | 2.578018 | 0.009937 | 0.173377 |
| 51510    | CHMP5     | 39.32524 | 1.264928 | 0.49107  | 2.575861 | 0.009999 | 0.17355  |
| 728658   | RPL13AP5  | 259.095  | 1.46813  | 0.569884 | 2.576191 | 0.00999  | 0.17355  |
| 9094     | UNC119    | 62.52249 | 1.419511 | 0.551145 | 2.575566 | 0.010008 | 0.17355  |
| 7086     | TKT       | 1878.888 | 1.233488 | 0.478652 | 2.577005 | 0.009966 | 0.17355  |
| 3005     | H1FO      | 12.49692 | 1.997451 | 0.77577  | 2.574799 | 0.01003  | 0.17369  |
| 1207     | CLNS1A    | 52.79752 | 1.111673 | 0.431886 | 2.573996 | 0.010053 | 0.173849 |
| 4695     | NDUFA2    | 8.891166 | 2.411084 | 0.937239 | 2.572538 | 0.010096 | 0.174337 |
| 2975     | GTF3C1    | 28.87535 | 1.26272  | 0.490989 | 2.571787 | 0.010118 | 0.17439  |
| 10916    | MAGED2    | 26.6806  | 1.600339 | 0.622346 | 2.571461 | 0.010127 | 0.17439  |
| 3936     | LCP1      | 675.2639 | 1.153431 | 0.448777 | 2.570167 | 0.010165 | 0.174797 |
| 6747     | SSR3      | 63.12173 | 1.357031 | 0.528433 | 2.568028 | 0.010228 | 0.175634 |
| 129880   | BBS5      | 20.1323  | 2.040326 | 0.794808 | 2.567069 | 0.010256 | 0.175874 |
| 1.02E+08 | LOC101927 | 94.51611 | -1.21648 | 0.473976 | -2.56655 | 0.010272 | 0.175893 |
| 441150   | C6orf226  | 14.24532 | 1.70575  | 0.665069 | 2.564771 | 0.010324 | 0.176356 |
| 9149     | DYRK1B    | 29.56904 | 1.763131 | 0.687469 | 2.56467  | 0.010327 | 0.176356 |
| 92558    | CCDC64    | 66.48376 | -1.01489 | 0.395913 | -2.56342 | 0.010365 | 0.176745 |
| 11094    | CACFD1    | 9.637979 | 2.264683 | 0.88415  | 2.561424 | 0.010424 | 0.177519 |
| 2634     | GBP2      | 136.8417 | 1.117586 | 0.436413 | 2.560848 | 0.010442 | 0.177567 |
| 1.01E+08 | HOTAIRM1  | 88.63085 | 1.055482 | 0.412646 | 2.557836 | 0.010533 | 0.178251 |
| 84957    | RELT      | 27.87704 | 1.277062 | 0.499324 | 2.557583 | 0.01054  | 0.178251 |
| 145853   | C15orf61  | 8.834914 | 2.278759 | 0.890624 | 2.558609 | 0.010509 | 0.178251 |
| 10237    | SLC35B1   | 29.76932 | 1.245979 | 0.487177 | 2.557551 | 0.010541 | 0.178251 |
| 83442    | SH3BGRL3  | 224.2754 | 1.091895 | 0.427003 | 2.557112 | 0.010555 | 0.178251 |
| 6305     | SBF1      | 67.5432  | 1.301736 | 0.50921  | 2.556385 | 0.010577 | 0.178379 |
| 27071    | DAPP1     | 72.56282 | 1.088488 | 0.426119 | 2.55442  | 0.010636 | 0.178502 |

|          |           |          |          |          |          |          |          |
|----------|-----------|----------|----------|----------|----------|----------|----------|
| 64283    | ARHGEF28  | 15.73929 | -1.64959 | 0.645753 | -2.55452 | 0.010633 | 0.178502 |
| 51399    | TRAPPC4   | 54.10347 | 1.249515 | 0.488967 | 2.555421 | 0.010606 | 0.178502 |
| 5037     | PEBP1     | 140.0905 | 1.238079 | 0.484716 | 2.554236 | 0.010642 | 0.178502 |
| 432      | ASGR1     | 10.24783 | 1.938233 | 0.759249 | 2.55283  | 0.010685 | 0.17898  |
| 25797    | QPCT      | 40.4495  | 1.38064  | 0.541955 | 2.547519 | 0.010849 | 0.18148  |
| 51312    | SLC25A37  | 2382.421 | 1.121244 | 0.440333 | 2.546355 | 0.010885 | 0.181839 |
| 5164     | PDK2      | 18.15746 | 1.90517  | 0.748638 | 2.54485  | 0.010932 | 0.182376 |
| 22809    | ATF5      | 54.52013 | 1.552272 | 0.610432 | 2.542909 | 0.010993 | 0.183108 |
| 80273    | GRPEL1    | 17.80936 | 1.436919 | 0.565312 | 2.541817 | 0.011028 | 0.183219 |
| 1.02E+08 | LOC101929 | 39.10786 | 1.523553 | 0.599612 | 2.540901 | 0.011057 | 0.183452 |
| 3108     | HLA-DMA   | 15.2833  | 1.694128 | 0.667105 | 2.539523 | 0.0111   | 0.183928 |
| 57050    | UTP3      | 22.13754 | 2.11879  | 0.835026 | 2.537394 | 0.011168 | 0.184057 |
| 51522    | TMEM14C   | 7.96273  | 2.250973 | 0.887103 | 2.537444 | 0.011167 | 0.184057 |
| 29074    | MRPL18    | 17.12453 | 1.521229 | 0.599372 | 2.538036 | 0.011148 | 0.184057 |
| 85441    | HELZ2     | 188.9826 | 2.695328 | 1.062083 | 2.537774 | 0.011156 | 0.184057 |
| 11273    | ATXN2L    | 110.2333 | -1.03017 | 0.406897 | -2.53176 | 0.011349 | 0.186537 |
| 116448   | OLIG1     | 21.74826 | 1.837106 | 0.726519 | 2.528642 | 0.01145  | 0.187953 |
| 410      | ARSA      | 39.25345 | 1.737265 | 0.687495 | 2.526947 | 0.011506 | 0.18861  |
| 23406    | COTL1     | 602.507  | 1.016448 | 0.402552 | 2.52501  | 0.01157  | 0.189401 |
| 5573     | PRKAR1A   | 154.9606 | 1.058222 | 0.419352 | 2.52347  | 0.01162  | 0.189979 |
| 23382    | AHCYL2    | 106.4529 | -1.03598 | 0.410945 | -2.52096 | 0.011704 | 0.190952 |
| 5699     | PSMB10    | 71.40798 | 1.309574 | 0.519678 | 2.519972 | 0.011736 | 0.190952 |
| 55181    | SMG8      | 13.77335 | 1.909064 | 0.757624 | 2.519804 | 0.011742 | 0.190952 |
| 5900     | RALGDS    | 203.7176 | 1.152309 | 0.457541 | 2.51848  | 0.011786 | 0.191164 |
| 10287    | RGS19     | 97.43806 | 1.06679  | 0.423548 | 2.518697 | 0.011779 | 0.191164 |
| 6257     | RXRβ      | 23.93341 | 1.397656 | 0.555331 | 2.516796 | 0.011843 | 0.191633 |
| 1.05E+08 | LOC105379 | 21.67346 | -1.52166 | 0.60469  | -2.51643 | 0.011855 | 0.191633 |
| 57572    | DOCK6     | 20.93461 | -1.60763 | 0.639047 | -2.51567 | 0.011881 | 0.191682 |
| 85379    | KIAA1671  | 40.67618 | -1.14414 | 0.455121 | -2.51391 | 0.01194  | 0.192387 |
| 54436    | SH3TC1    | 90.60749 | 1.002259 | 0.398933 | 2.512351 | 0.011993 | 0.192601 |
| 23193    | GANAB     | 380.3952 | 1.244378 | 0.495208 | 2.512837 | 0.011976 | 0.192601 |
| 57707    | TLDC1     | 42.69808 | -1.06034 | 0.422199 | -2.51148 | 0.012023 | 0.192601 |
| 7737     | RNF113A   | 12.23687 | 2.019972 | 0.80422  | 2.511716 | 0.012015 | 0.192601 |
| 23020    | SNRNP200  | 159.7815 | 1.480052 | 0.589377 | 2.511214 | 0.012032 | 0.192601 |
| 10758    | TRAF3IP2  | 9.188866 | 2.436145 | 0.970603 | 2.509929 | 0.012076 | 0.192992 |
| 282974   | STK32C    | 31.60636 | 1.312272 | 0.523001 | 2.509119 | 0.012103 | 0.192992 |
| 6843     | VAMP1     | 10.19607 | 2.035187 | 0.811074 | 2.509251 | 0.012099 | 0.192992 |
| 4688     | NCF2      | 448.8094 | 1.024297 | 0.408407 | 2.508029 | 0.012141 | 0.193337 |
| 1E+08    | TOPORS-A  | 20.76224 | 1.384983 | 0.55257  | 2.506439 | 0.012195 | 0.193958 |
| 93643    | TJAP1     | 22.31421 | 1.319164 | 0.526654 | 2.504804 | 0.012252 | 0.194605 |
| 392256   | RPS26P6   | 9.157598 | 2.439917 | 0.975435 | 2.501362 | 0.012372 | 0.195999 |
| 81532    | MOB2      | 31.30302 | 1.308959 | 0.523263 | 2.501531 | 0.012366 | 0.195999 |
| 427      | ASAHI     | 137.4074 | 1.025159 | 0.409956 | 2.500654 | 0.012396 | 0.196138 |
| 3156     | HMGCR     | 27.63881 | 1.441481 | 0.576736 | 2.499379 | 0.012441 | 0.196592 |
| 6128     | RPL6      | 683.3451 | 1.337485 | 0.536926 | 2.491006 | 0.012738 | 0.20077  |
| 56905    | C15orf39  | 51.0565  | 1.403469 | 0.563685 | 2.489811 | 0.012781 | 0.200901 |
| 159      | ADSS      | 45.89323 | 1.108147 | 0.44502  | 2.490105 | 0.012771 | 0.200901 |
| 22937    | SCAP      | 131.5634 | 1.143549 | 0.459519 | 2.488576 | 0.012826 | 0.201114 |
| 60559    | SPCS3     | 252.695  | 1.07324  | 0.431469 | 2.487407 | 0.012868 | 0.201197 |
| 578      | BAK1      | 93.75363 | 1.404831 | 0.564999 | 2.48643  | 0.012903 | 0.201197 |
| 84153    | RNASEH2C  | 34.47507 | 1.247219 | 0.501525 | 2.486852 | 0.012888 | 0.201197 |
| 29902    | FAM216A   | 14.62989 | 1.822325 | 0.732986 | 2.486165 | 0.012913 | 0.201197 |
| 55920    | RCC2      | 64.39967 | 1.10462  | 0.444152 | 2.487032 | 0.012881 | 0.201197 |
| 6618     | SNAPC2    | 11.22495 | 1.974305 | 0.795091 | 2.483117 | 0.013024 | 0.202413 |

|          |          |          |          |          |          |          |          |
|----------|----------|----------|----------|----------|----------|----------|----------|
| 126364   | LRRC25   | 36.21115 | 1.302241 | 0.524354 | 2.483515 | 0.013009 | 0.202413 |
| 81030    | ZBP1     | 53.24228 | 1.341335 | 0.5407   | 2.480738 | 0.013111 | 0.203255 |
| 3240     | HP       | 10.67498 | 1.935285 | 0.780662 | 2.47903  | 0.013174 | 0.203864 |
| 57136    | APMAP    | 181.8277 | 1.243042 | 0.501475 | 2.47877  | 0.013184 | 0.203864 |
| 55573    | CDV3     | 159.207  | 1.213854 | 0.49019  | 2.476295 | 0.013275 | 0.204852 |
| 5213     | PFKM     | 111.152  | 1.128342 | 0.455684 | 2.476148 | 0.013281 | 0.204852 |
| 4794     | NFKBIE   | 10.38649 | 1.771952 | 0.716079 | 2.474521 | 0.013342 | 0.205529 |
| 8991     | SELENBP1 | 83.43723 | 1.453007 | 0.587741 | 2.47219  | 0.013429 | 0.206111 |
| 56935    | SMCO4    | 27.03674 | 1.584978 | 0.641146 | 2.472103 | 0.013432 | 0.206111 |
| 353514   | LILRA5   | 38.73433 | 1.243751 | 0.503192 | 2.471722 | 0.013446 | 0.206111 |
| 440345   | NPIPBA   | 1027.946 | -1.03807 | 0.420172 | -2.47058 | 0.013489 | 0.206513 |
| 6232     | RPS27    | 2524.557 | 1.193992 | 0.483833 | 2.467775 | 0.013596 | 0.207878 |
| 10421    | CD2BP2   | 50.35764 | 1.284703 | 0.521066 | 2.465529 | 0.013681 | 0.208408 |
| 682      | BSG      | 103.2203 | 1.622567 | 0.658067 | 2.465657 | 0.013676 | 0.208408 |
| 3399     | ID3      | 27.90484 | 1.841201 | 0.748141 | 2.461035 | 0.013854 | 0.210775 |
| 1.05E+08 | LOC10537 | 33.38746 | -1.22657 | 0.498639 | -2.45984 | 0.0139   | 0.211219 |
| 643872   | HMG2P6   | 9.89838  | 2.175281 | 0.885007 | 2.457925 | 0.013974 | 0.212084 |
| 1901     | S1PR1    | 24.40516 | 1.769591 | 0.720937 | 2.454572 | 0.014105 | 0.213544 |
| 3094     | HINT1    | 439.8053 | 1.18658  | 0.484098 | 2.451114 | 0.014241 | 0.214793 |
| 203245   | NAIF1    | 12.42634 | 1.754552 | 0.715832 | 2.451065 | 0.014243 | 0.214793 |
| 3636     | INPPL1   | 180.431  | 1.226425 | 0.500415 | 2.450816 | 0.014253 | 0.214793 |
| 391712   | TRIM61   | 10.39322 | 1.879691 | 0.767205 | 2.450049 | 0.014284 | 0.21492  |
| 9296     | ATP6V1F  | 88.3108  | 1.005948 | 0.41198  | 2.44174  | 0.014617 | 0.219393 |
| 80142    | PTGES2   | 16.25218 | 1.616484 | 0.662503 | 2.439964 | 0.014689 | 0.220205 |
| 201176   | ARHGAP27 | 98.17754 | 1.141716 | 0.468282 | 2.438095 | 0.014765 | 0.220539 |
| 4357     | MPST     | 32.75544 | 1.267084 | 0.51967  | 2.438247 | 0.014759 | 0.220539 |
| 4245     | MGAT1    | 186.2804 | 1.135093 | 0.465659 | 2.437607 | 0.014785 | 0.220569 |
| 6130     | RPL7A    | 269.963  | 1.086447 | 0.446582 | 2.432805 | 0.014982 | 0.22277  |
| 10227    | MFSD10   | 27.5258  | 1.196983 | 0.492257 | 2.431624 | 0.015031 | 0.223161 |
| 9513     | FXR2     | 90.16226 | 1.445118 | 0.594582 | 2.430476 | 0.015079 | 0.223599 |
| 3728     | JUP      | 33.11244 | 1.478398 | 0.60885  | 2.428183 | 0.015175 | 0.224476 |
| 4779     | NFE2L1   | 37.64486 | 1.255858 | 0.517165 | 2.428351 | 0.015168 | 0.224476 |
| 54809    | SAMD9    | 74.07416 | 1.073156 | 0.442206 | 2.426826 | 0.015232 | 0.225046 |
| 120425   | AMICA1   | 624.3432 | 1.080855 | 0.445939 | 2.423771 | 0.01536  | 0.226675 |
| 8394     | PIP5K1A  | 692.3669 | 1.113728 | 0.459773 | 2.422345 | 0.015421 | 0.226882 |
| 1.01E+08 | FRY-AS1  | 12.64881 | -1.66657 | 0.688178 | -2.42171 | 0.015448 | 0.226882 |
| 2038     | EPB42    | 20.96052 | 1.45669  | 0.601516 | 2.421697 | 0.015448 | 0.226882 |
| 148789   | B3GALNT2 | 30.26551 | -1.1397  | 0.470505 | -2.42229 | 0.015423 | 0.226882 |
| 5252     | PHF1     | 18.48488 | 1.928898 | 0.796895 | 2.420517 | 0.015498 | 0.227231 |
| 90025    | UBE3D    | 43.64598 | -1.00038 | 0.41363  | -2.41854 | 0.015583 | 0.227231 |
| 3087     | HHEX     | 10.46796 | 1.906278 | 0.788058 | 2.418956 | 0.015565 | 0.227231 |
| 966      | CD59     | 34.07992 | 1.128947 | 0.466518 | 2.419942 | 0.015523 | 0.227231 |
| 10291    | SF3A1    | 96.73552 | 1.253119 | 0.51799  | 2.419197 | 0.015555 | 0.227231 |
| 8694     | DGAT1    | 17.24302 | 1.478263 | 0.612175 | 2.414772 | 0.015745 | 0.228573 |
| 400823   | FAM177B  | 27.14456 | 1.173825 | 0.486009 | 2.415233 | 0.015725 | 0.228573 |
| 79575    | ABHD8    | 11.31976 | 1.841472 | 0.762389 | 2.415397 | 0.015718 | 0.228573 |
| 8717     | TRADD    | 30.69768 | 1.256416 | 0.520583 | 2.413477 | 0.015801 | 0.229002 |
| 79134    | TMEM185B | 10.57215 | 1.869944 | 0.774905 | 2.413126 | 0.015816 | 0.229002 |
| 5813     | PURA     | 65.573   | 1.29964  | 0.53885  | 2.411879 | 0.015871 | 0.229272 |
| 64757    | 1-Mar    | 15.52942 | 1.469067 | 0.609107 | 2.411837 | 0.015872 | 0.229272 |
| 284323   | ZNF780A  | 15.71333 | 1.488593 | 0.617801 | 2.409501 | 0.015974 | 0.230473 |
| 221458   | KIF6     | 28.29442 | -1.33769 | 0.555516 | -2.40802 | 0.016039 | 0.231076 |
| 144406   | WDR66    | 21.47184 | -1.31052 | 0.544305 | -2.40769 | 0.016054 | 0.231076 |
| 10608    | MXD4     | 89.77278 | 1.353376 | 0.562314 | 2.4068   | 0.016093 | 0.23137  |

|                   |          |          |          |          |          |          |
|-------------------|----------|----------|----------|----------|----------|----------|
| 1861 TOR1A        | 12.23609 | 1.738316 | 0.722585 | 2.405689 | 0.016142 | 0.231623 |
| 26012 NSMF        | 49.77652 | 1.786311 | 0.742581 | 2.405545 | 0.016148 | 0.231623 |
| 1.05E+08 LOC10537 | 10.50508 | 1.936863 | 0.805471 | 2.404634 | 0.016189 | 0.23193  |
| 3015 H2AFZ        | 456.5586 | 1.050712 | 0.437594 | 2.401108 | 0.016345 | 0.232819 |
| 6228 RPS23        | 2212.89  | 1.269094 | 0.528373 | 2.401891 | 0.016311 | 0.232819 |
| 9587 MAD2L1BP     | 8.198694 | 2.006933 | 0.835739 | 2.401388 | 0.016333 | 0.232819 |
| 10023 FRAT1       | 26.36004 | 1.293944 | 0.538829 | 2.401401 | 0.016332 | 0.232819 |
| 200185 KRTCAP2    | 71.03428 | 1.028731 | 0.428295 | 2.401923 | 0.016309 | 0.232819 |
| 3858 KRT10        | 40.63179 | 1.350276 | 0.562743 | 2.399455 | 0.01642  | 0.233602 |
| 81892 SLIRP       | 45.6368  | 1.106755 | 0.461392 | 2.398731 | 0.016452 | 0.233794 |
| 573 BAG1          | 161.4949 | 1.123528 | 0.469061 | 2.395271 | 0.016608 | 0.23558  |
| 4953 ODC1         | 33.72734 | 1.311351 | 0.547515 | 2.395094 | 0.016616 | 0.23558  |
| 399687 MYO18A     | 72.75654 | -1.03955 | 0.434225 | -2.39403 | 0.016664 | 0.235994 |
| 644338 RPL37AP8   | 10.02268 | 1.836303 | 0.767738 | 2.391836 | 0.016764 | 0.236052 |
| 4209 MEF2D        | 116.2654 | 1.064142 | 0.444898 | 2.391878 | 0.016762 | 0.236052 |
| 1.02E+08 LOC10192 | 35.37779 | -1.11611 | 0.466561 | -2.3922  | 0.016748 | 0.236052 |
| 51646 YPEL5       | 49.83671 | 1.058357 | 0.443028 | 2.388917 | 0.016898 | 0.23722  |
| 83719 YPEL3       | 159.5638 | 1.08726  | 0.455451 | 2.387215 | 0.016977 | 0.237943 |
| 6124 RPL4         | 236.238  | 1.178006 | 0.494105 | 2.384121 | 0.01712  | 0.239134 |
| 64773 PCED1A      | 63.01341 | 1.157818 | 0.485633 | 2.384141 | 0.017119 | 0.239134 |
| 54978 SLC35F6     | 21.82303 | 1.292582 | 0.542016 | 2.384767 | 0.01709  | 0.239134 |
| 6029 RN7SL1       | 42.47761 | -1.19837 | 0.502991 | -2.38249 | 0.017196 | 0.239922 |
| 8870 IER3         | 208.2849 | 1.162241 | 0.488463 | 2.379384 | 0.017342 | 0.24168  |
| 1.01E+08 OTUD6B-A | 22.86654 | 1.389186 | 0.584054 | 2.378525 | 0.017382 | 0.241969 |
| 90007 MIDN        | 422.691  | 1.046306 | 0.440188 | 2.376952 | 0.017456 | 0.242729 |
| 212 ALAS2         | 475.0992 | 1.315745 | 0.55419  | 2.374177 | 0.017588 | 0.244008 |
| 4502 MT2A         | 12.99441 | 1.640462 | 0.692098 | 2.370274 | 0.017775 | 0.244939 |
| 3615 IMPDH2       | 15.89522 | 1.462411 | 0.616903 | 2.370568 | 0.017761 | 0.244939 |
| 90427 BMF         | 71.97063 | 1.230495 | 0.519759 | 2.367433 | 0.017912 | 0.246155 |
| 4731 NDUFV3       | 47.09458 | 1.096694 | 0.463295 | 2.367161 | 0.017925 | 0.246155 |
| 63923 TNN         | 14.84655 | 1.612685 | 0.683494 | 2.359473 | 0.018301 | 0.249367 |
| 5034 P4HB         | 111.3145 | 1.083628 | 0.459341 | 2.359093 | 0.01832  | 0.249367 |
| 29058 TMEM230     | 33.21367 | 1.081758 | 0.458333 | 2.360204 | 0.018265 | 0.249367 |
| 962 CD48          | 59.8751  | 1.157098 | 0.490786 | 2.357641 | 0.018391 | 0.24979  |
| 3052 HCCS         | 12.08371 | 1.757647 | 0.745415 | 2.357944 | 0.018376 | 0.24979  |
| 1186 CLCN7        | 47.17258 | 1.32799  | 0.563542 | 2.356507 | 0.018448 | 0.250079 |
| 51003 MED31       | 14.86061 | 1.625576 | 0.690415 | 2.354491 | 0.018548 | 0.250532 |
| 282694 NASPP1     | 7.904654 | -2.5946  | 1.102913 | -2.35249 | 0.018648 | 0.250642 |
| 54108 CHRAC1      | 8.389439 | 2.357108 | 1.001983 | 2.352442 | 0.018651 | 0.250642 |
| 120071 GYLTL1B    | 16.09067 | 1.690483 | 0.719336 | 2.350061 | 0.01877  | 0.251871 |
| 4635 MYL4         | 16.12872 | 1.669413 | 0.710504 | 2.349618 | 0.018793 | 0.251896 |
| 11051 NUDT21      | 26.22562 | 1.245267 | 0.530363 | 2.347952 | 0.018877 | 0.25275  |
| 4514 COX3         | 2955.591 | 1.0536   | 0.449274 | 2.345117 | 0.019021 | 0.254125 |
| 10063 COX17       | 23.45018 | 1.375951 | 0.586722 | 2.345152 | 0.019019 | 0.254125 |
| 9332 CD163        | 12.84089 | 1.776424 | 0.758638 | 2.341595 | 0.019202 | 0.255701 |
| 1974 EIF4A2       | 26.85257 | 1.26673  | 0.541131 | 2.340895 | 0.019238 | 0.255903 |
| 285148 IAHI       | 41.75586 | 1.195315 | 0.511421 | 2.337242 | 0.019427 | 0.257859 |
| 1059 CENPB        | 53.82004 | 1.234134 | 0.528439 | 2.335436 | 0.019521 | 0.258828 |
| 10362 HMG20B      | 24.49933 | 1.401662 | 0.601429 | 2.330552 | 0.019777 | 0.261662 |
| 834 CASP1         | 49.06579 | 1.266895 | 0.544049 | 2.328639 | 0.019878 | 0.261872 |
| 64651 CSRNP1      | 17.53277 | 1.383699 | 0.594184 | 2.328738 | 0.019873 | 0.261872 |
| 84967 LSM10       | 31.35213 | 1.263778 | 0.542671 | 2.32881  | 0.019869 | 0.261872 |
| 4354 MPP1         | 152.7791 | 1.083171 | 0.465273 | 2.328031 | 0.01991  | 0.262016 |
| 29035 C16orf72    | 90.4671  | 1.015979 | 0.436718 | 2.326398 | 0.019997 | 0.262877 |



|          |           |          |          |          |          |          |          |
|----------|-----------|----------|----------|----------|----------|----------|----------|
| 55303    | GIMAP4    | 190.9378 | 1.046607 | 0.45044  | 2.323519 | 0.020151 | 0.263949 |
| 653234   | AGAP10P   | 18.93781 | -1.35147 | 0.581913 | -2.32247 | 0.020208 | 0.263949 |
| 1.01E+08 | FAM157C   | 94.13684 | 1.144341 | 0.492687 | 2.322653 | 0.020198 | 0.263949 |
| 2879     | GPX4      | 23.64266 | 1.435423 | 0.617838 | 2.323299 | 0.020163 | 0.263949 |
| 23275    | POFUT2    | 12.24471 | 1.6352   | 0.703967 | 2.322836 | 0.020188 | 0.263949 |
| 4524     | MTHFR     | 25.96255 | -1.1981  | 0.516823 | -2.31821 | 0.020438 | 0.265822 |
| 6201     | RPS7      | 216.5092 | 1.175673 | 0.507469 | 2.316739 | 0.020518 | 0.266581 |
| 5704     | PSMC4     | 27.38448 | 1.209101 | 0.522202 | 2.315389 | 0.020592 | 0.266974 |
| 29802    | VPREB3    | 51.92066 | 1.036291 | 0.447531 | 2.315575 | 0.020581 | 0.266974 |
| 10308    | ZNF267    | 25.06077 | 1.489035 | 0.643365 | 2.314447 | 0.020643 | 0.26736  |
| 8337     | HIST2H2A  | 56.69719 | 1.106186 | 0.478161 | 2.313416 | 0.0207   | 0.26781  |
| 392437   | FTLP2     | 27.11247 | 1.837738 | 0.795639 | 2.309765 | 0.020901 | 0.269564 |
| 90231    | KIAA2013  | 126.9693 | 1.024566 | 0.443708 | 2.309101 | 0.020938 | 0.269569 |
| 728392   | LOC72839  | 27.39906 | 1.421474 | 0.615632 | 2.308966 | 0.020945 | 0.269569 |
| 79629    | OCEL1     | 15.18818 | 1.506055 | 0.653655 | 2.304052 | 0.02122  | 0.271674 |
| 81037    | CLPTM1L   | 90.78975 | 1.015827 | 0.441149 | 2.302685 | 0.021297 | 0.272374 |
| 10567    | RABAC1    | 30.12051 | 1.233113 | 0.536196 | 2.299744 | 0.021463 | 0.273928 |
| 4987     | OPRL1     | 9.213196 | 1.8939   | 0.823464 | 2.299918 | 0.021453 | 0.273928 |
| 1.05E+08 | LOC10536  | 9.043446 | 2.077008 | 0.903637 | 2.298499 | 0.021533 | 0.274546 |
| 91561    | RPS2P40   | 77.84863 | 1.456305 | 0.63381  | 2.297699 | 0.021579 | 0.274785 |
| 1.02E+08 | LOC10193  | 30.08507 | -1.11352 | 0.484772 | -2.29699 | 0.021619 | 0.274785 |
| 7099     | TLR4      | 46.925   | 1.054398 | 0.459714 | 2.293593 | 0.021814 | 0.276582 |
| 8228     | PNPLA4    | 7.621971 | 2.025467 | 0.883345 | 2.292951 | 0.021851 | 0.276582 |
| 25978    | CHMP2B    | 22.63765 | 1.279461 | 0.557928 | 2.293236 | 0.021834 | 0.276582 |
| 113878   | DTX2      | 140.4491 | 1.430037 | 0.624077 | 2.291443 | 0.021938 | 0.277397 |
| 6647     | SOD1      | 57.66332 | 1.040125 | 0.454317 | 2.289426 | 0.022055 | 0.278015 |
| 54980    | C2orf42   | 29.92477 | -1.05257 | 0.459684 | -2.28978 | 0.022034 | 0.278015 |
| 59283    | CACNG8    | 7.584244 | -2.01268 | 0.879676 | -2.28798 | 0.022139 | 0.278788 |
| 3181     | HNRNPA2B  | 364.1951 | 1.205575 | 0.52712  | 2.287096 | 0.02219  | 0.279151 |
| 140700   | SAMD10    | 9.26886  | 1.940514 | 0.848632 | 2.286638 | 0.022217 | 0.279201 |
| 25915    | NDUFAF3   | 48.14622 | 1.064179 | 0.465498 | 2.286105 | 0.022248 | 0.279307 |
| 1939     | EIF2D     | 19.96229 | 1.283204 | 0.561761 | 2.284251 | 0.022357 | 0.279813 |
| 4570     | TRNN      | 166.8026 | -1.06719 | 0.468273 | -2.279   | 0.022667 | 0.282834 |
| 1.01E+08 | TVP23C-CI | 35.32429 | -1.07233 | 0.470861 | -2.27738 | 0.022764 | 0.28375  |
| 1.02E+08 | LOC10192  | 34.69406 | 1.097529 | 0.482163 | 2.27626  | 0.02283  | 0.283877 |
| 3492     | IGH       | 626.3826 | 1.081738 | 0.47529  | 2.275954 | 0.022849 | 0.283877 |
| 55851    | PSENE1    | 114.0448 | 1.124901 | 0.494448 | 2.275065 | 0.022902 | 0.284032 |
| 54431    | DNAJC10   | 33.63949 | 1.115498 | 0.49049  | 2.274251 | 0.022951 | 0.28435  |
| 201965   | RWDD4     | 16.06954 | 1.363718 | 0.599866 | 2.27337  | 0.023004 | 0.28472  |
| 25989    | ULK3      | 28.06923 | 1.110219 | 0.488846 | 2.271102 | 0.023141 | 0.285838 |
| 5538     | PPT1      | 200.1361 | 1.090779 | 0.480788 | 2.268733 | 0.023285 | 0.286103 |
| 80028    | FBXL18    | 36.13956 | -1.05993 | 0.467327 | -2.26806 | 0.023325 | 0.286103 |
| 3043     | HBB       | 6188.582 | 2.919943 | 1.286929 | 2.268923 | 0.023273 | 0.286103 |
| 27102    | EIF2AK1   | 92.22513 | 1.019945 | 0.449975 | 2.266669 | 0.02341  | 0.28686  |
| 1.05E+08 | LOC10537  | 29.48704 | -1.24594 | 0.549991 | -2.26538 | 0.02349  | 0.287304 |
| 6809     | STX3      | 128.099  | 1.030482 | 0.45518  | 2.263903 | 0.02358  | 0.288076 |
| 8677     | STX10     | 27.54545 | 1.202073 | 0.531585 | 2.261301 | 0.023741 | 0.288088 |
| 374907   | B3GNT8    | 9.008933 | 2.468727 | 1.091565 | 2.261639 | 0.02372  | 0.288088 |
| 54973    | CPSF3L    | 7.281314 | 2.093759 | 0.925595 | 2.262067 | 0.023693 | 0.288088 |
| 1.05E+08 | LOC10537  | 9.789738 | -2.10164 | 0.929834 | -2.26023 | 0.023807 | 0.288548 |
| 728489   | DNLZ      | 53.96148 | 1.094944 | 0.484575 | 2.259598 | 0.023846 | 0.288742 |
| 51503    | CWC15     | 37.87403 | 1.192511 | 0.52802  | 2.258457 | 0.023917 | 0.289316 |
| 8875     | VNN2      | 1908.389 | 1.068798 | 0.473894 | 2.255352 | 0.024111 | 0.290803 |
| 1.02E+08 | LOC10192  | 12.98438 | -1.5965  | 0.708233 | -2.2542  | 0.024184 | 0.291389 |

|          |           |          |          |          |          |          |          |
|----------|-----------|----------|----------|----------|----------|----------|----------|
| 10555    | AGPAT2    | 47.93872 | 1.234422 | 0.548203 | 2.25176  | 0.024337 | 0.292669 |
| 8314     | BAP1      | 12.82865 | 1.550916 | 0.688684 | 2.251999 | 0.024322 | 0.292669 |
| 226      | ALDOA     | 78.78535 | 1.079504 | 0.479989 | 2.24902  | 0.024511 | 0.293895 |
| 1.05E+08 | LOC105370 | 26.53571 | 1.176039 | 0.523036 | 2.248486 | 0.024545 | 0.29392  |
| 92610    | TIFA      | 10.35844 | 1.730122 | 0.769785 | 2.24754  | 0.024606 | 0.294165 |
| 89797    | NAV2      | 20.23791 | -1.31198 | 0.584098 | -2.24616 | 0.024694 | 0.294574 |
| 7277     | TUBA4A    | 47.26807 | 1.229764 | 0.547565 | 2.245879 | 0.024712 | 0.294574 |
| 9531     | BAG3      | 10.56701 | 1.784972 | 0.795832 | 2.2429   | 0.024903 | 0.296568 |
| 57343    | ZNF304    | 14.84831 | 1.502058 | 0.670338 | 2.240748 | 0.025042 | 0.297361 |
| 4055     | LTBR      | 118.2511 | 1.313216 | 0.586342 | 2.239676 | 0.025112 | 0.297672 |
| 11140    | CDC37     | 203.3087 | 1.108416 | 0.49494  | 2.239497 | 0.025124 | 0.297672 |
| 5566     | PRKACA    | 298.357  | 1.031797 | 0.461479 | 2.235848 | 0.025362 | 0.299346 |
| 79650    | USB1      | 32.48869 | 1.259666 | 0.563858 | 2.234014 | 0.025482 | 0.299397 |
| 5111     | PCNA      | 14.68675 | 1.542089 | 0.690236 | 2.234146 | 0.025473 | 0.299397 |
| 246210   | IKBKGP1   | 45.87171 | 1.193442 | 0.53417  | 2.234197 | 0.02547  | 0.299397 |
| 57393    | TMEM27    | 7.365975 | 2.045896 | 0.915981 | 2.233557 | 0.025512 | 0.299464 |
| 1.03E+08 | LOC102722 | 11.48814 | 1.955034 | 0.875589 | 2.232822 | 0.025561 | 0.299746 |
| 55437    | STRADB    | 79.17145 | 1.239477 | 0.555644 | 2.230703 | 0.025701 | 0.301102 |
| 84969    | TOX2      | 60.50688 | -1.17488 | 0.527054 | -2.22915 | 0.025804 | 0.302023 |
| 29126    | CD274     | 11.48268 | 1.722833 | 0.773068 | 2.228565 | 0.025843 | 0.302189 |
| 80179    | MYO19     | 15.03892 | -1.39462 | 0.626046 | -2.22767 | 0.025903 | 0.302598 |
| 1.05E+08 | LOC105370 | 9.830221 | -2.10638 | 0.945934 | -2.22677 | 0.025963 | 0.302726 |
| 744      | MPPED2    | 11.21498 | 1.6383   | 0.735861 | 2.226371 | 0.025989 | 0.302749 |
| 643646   | HSD17B1P  | 8.270296 | 2.271074 | 1.020466 | 2.225527 | 0.026046 | 0.303087 |
| 1.01E+08 | INAFM2    | 7.293341 | 2.266704 | 1.019822 | 2.222646 | 0.02624  | 0.304797 |
| 55695    | NSUN5     | 12.14264 | 1.500029 | 0.675373 | 2.221037 | 0.026348 | 0.305479 |
| 2677     | GGCX      | 11.14984 | 1.65628  | 0.745852 | 2.220653 | 0.026374 | 0.305479 |
| 27000    | DNAJC2    | 19.55246 | -1.3025  | 0.587257 | -2.21794 | 0.026559 | 0.306763 |
| 97       | ACYP1     | 20.8332  | -1.25557 | 0.566329 | -2.21702 | 0.026621 | 0.307198 |
| 5743     | PTGS2     | 8.194731 | 2.291067 | 1.034704 | 2.214226 | 0.026813 | 0.308157 |
| 7003     | TEAD1     | 12.53474 | -1.53331 | 0.693231 | -2.21182 | 0.026979 | 0.309576 |
| 1.03E+08 | LOC102722 | 9.46353  | -1.99266 | 0.90238  | -2.20822 | 0.027229 | 0.311101 |
| 10857    | PGRMC1    | 8.771589 | 1.979676 | 0.896558 | 2.208083 | 0.027238 | 0.311101 |
| 9246     | UBE2L6    | 81.16989 | 1.100089 | 0.498515 | 2.206731 | 0.027333 | 0.311311 |
| 2077     | ERF       | 156.1129 | 1.0463   | 0.474093 | 2.206951 | 0.027317 | 0.311311 |
| 7675     | ZNF121    | 21.2629  | 1.194294 | 0.541905 | 2.20388  | 0.027533 | 0.313297 |
| 1.05E+08 | LOC105370 | 20.66183 | -1.18885 | 0.539582 | -2.20328 | 0.027575 | 0.313486 |
| 80196    | RNF34     | 23.75149 | 1.177749 | 0.534805 | 2.202203 | 0.027651 | 0.313901 |
| 9045     | RPL14     | 228.4905 | 1.022182 | 0.464274 | 2.20168  | 0.027688 | 0.313901 |
| 1E+08    | LOC100133 | 20.24977 | -1.51799 | 0.690753 | -2.19759 | 0.027978 | 0.315244 |
| 6856     | SYPL1     | 22.80696 | 1.250368 | 0.569188 | 2.196758 | 0.028038 | 0.315244 |
| 286059   | LOC286059 | 31.55833 | 1.428094 | 0.64982  | 2.197675 | 0.027972 | 0.315244 |
| 1E+08    | LOC100419 | 17.08984 | 1.352566 | 0.615668 | 2.196909 | 0.028027 | 0.315244 |
| 2664     | GDI1      | 22.07728 | 1.362039 | 0.620014 | 2.196786 | 0.028036 | 0.315244 |
| 219348   | PLAC9     | 27.25469 | -1.11401 | 0.507526 | -2.19499 | 0.028164 | 0.3158   |
| 83892    | KCTD10    | 28.81996 | 1.206576 | 0.54965  | 2.195172 | 0.028151 | 0.3158   |
| 64332    | NFKBIZ    | 30.64144 | 1.136841 | 0.517803 | 2.195509 | 0.028127 | 0.3158   |
| 11282    | MGAT4B    | 106.4506 | 1.085519 | 0.494669 | 2.194435 | 0.028204 | 0.31594  |
| 1874     | E2F4      | 16.63361 | 1.497507 | 0.682515 | 2.1941   | 0.028228 | 0.31594  |
| 9228     | DLGAP2    | 12.13005 | -1.83661 | 0.837813 | -2.19214 | 0.028369 | 0.316856 |
| 4303     | FOXO4     | 34.59867 | 1.238428 | 0.565005 | 2.191889 | 0.028388 | 0.316856 |
| 9875     | URB1      | 16.28316 | -1.31415 | 0.599981 | -2.19032 | 0.028501 | 0.317256 |
| 7442     | TRPV1     | 22.39137 | -1.1951  | 0.546792 | -2.18566 | 0.02884  | 0.320164 |
| 221914   | GPC2      | 12.9989  | 1.729765 | 0.793234 | 2.18065  | 0.029209 | 0.323383 |

|                    |          |          |          |          |          |          |
|--------------------|----------|----------|----------|----------|----------|----------|
| 6138 RPL15         | 359.1801 | 1.040251 | 0.477172 | 2.180034 | 0.029255 | 0.323597 |
| 9429 ABCG2         | 13.04855 | -1.47904 | 0.679177 | -2.17769 | 0.029429 | 0.324402 |
| 401505 TOMM5       | 18.67568 | 1.310961 | 0.602012 | 2.177633 | 0.029433 | 0.324402 |
| 50862 RNF141       | 35.48767 | 1.236302 | 0.567773 | 2.177457 | 0.029446 | 0.324402 |
| 1E+08 OST4         | 19.12195 | 1.330212 | 0.611051 | 2.176924 | 0.029486 | 0.324402 |
| 554226 ANKRD30B1   | 15.32568 | -1.39954 | 0.642853 | -2.17707 | 0.029475 | 0.324402 |
| 653479 MRPL45P2    | 40.46278 | -1.04526 | 0.480592 | -2.17495 | 0.029634 | 0.325735 |
| 11068 CYB561D2     | 17.98057 | 1.33596  | 0.61446  | 2.174201 | 0.02969  | 0.326059 |
| 283871 PGP         | 17.90667 | 1.24749  | 0.574458 | 2.171596 | 0.029886 | 0.327334 |
| 9219 MTA2          | 49.97259 | 1.041663 | 0.480218 | 2.169146 | 0.030072 | 0.329072 |
| 54985 HCFC1R1      | 7.586667 | 2.192366 | 1.012368 | 2.165581 | 0.030343 | 0.331454 |
| 54998 AURKAIP1     | 69.30142 | 1.00536  | 0.46448  | 2.164487 | 0.030427 | 0.331779 |
| 392748 RPS27P17    | 150.5759 | -1.29547 | 0.59908  | -2.16243 | 0.030585 | 0.333209 |
| 10395 DLC1         | 20.50946 | -1.53588 | 0.710372 | -2.16207 | 0.030613 | 0.333209 |
| 4145 MATK          | 34.76013 | 1.408022 | 0.651652 | 2.160696 | 0.030719 | 0.333775 |
| 11258 DCTN3        | 10.90027 | 1.598964 | 0.740334 | 2.159787 | 0.030789 | 0.334243 |
| 29087 THYN1        | 34.56955 | 1.284687 | 0.594945 | 2.159336 | 0.030824 | 0.334327 |
| 23780 APOL2        | 13.23799 | 1.739009 | 0.805771 | 2.158191 | 0.030913 | 0.334995 |
| 85027 SMIM3        | 11.66362 | 1.55176  | 0.719751 | 2.155967 | 0.031086 | 0.335285 |
| 4240 MFGE8         | 23.28401 | 1.848585 | 0.857515 | 2.155746 | 0.031104 | 0.335285 |
| 79159 NOL12        | 21.82006 | 1.237474 | 0.574    | 2.15588  | 0.031093 | 0.335285 |
| 2017 CTTN          | 18.22172 | 1.907029 | 0.885114 | 2.154558 | 0.031196 | 0.335697 |
| 285442 LOC285444   | 8.728907 | 1.930429 | 0.896957 | 2.152198 | 0.031382 | 0.336511 |
| 4519 CYTB          | 948.1076 | 1.183958 | 0.550043 | 2.152482 | 0.031359 | 0.336511 |
| 2765 GML           | 11.40539 | 1.974053 | 0.917506 | 2.151542 | 0.031433 | 0.336771 |
| 23277 CLUH         | 29.32381 | 1.031269 | 0.479763 | 2.14954  | 0.031592 | 0.337876 |
| 4043 LRPAP1        | 59.4767  | 1.075843 | 0.500806 | 2.148223 | 0.031696 | 0.338404 |
| 11270 NRM          | 12.38236 | 1.509072 | 0.702381 | 2.148508 | 0.031673 | 0.338404 |
| 284194 LGALS9B     | 32.91905 | 1.156915 | 0.538934 | 2.146671 | 0.03182  | 0.339132 |
| 3119 HLA-DQB1      | 91.46758 | 1.095466 | 0.510626 | 2.145341 | 0.031926 | 0.339672 |
| 11253 MAN1B1       | 24.132   | 1.275833 | 0.595604 | 2.142082 | 0.032187 | 0.341565 |
| 1.01E+08 BOLA3-AS1 | 10.87996 | 1.632365 | 0.761989 | 2.142241 | 0.032174 | 0.341565 |
| 1E+08 FCGR1C       | 12.43096 | 1.80036  | 0.840634 | 2.141668 | 0.03222  | 0.341623 |
| 3614 IMPDH1        | 61.12873 | 1.175538 | 0.549302 | 2.140059 | 0.03235  | 0.342113 |
| 6150 MRPL23        | 26.44549 | 1.393018 | 0.651456 | 2.138314 | 0.032491 | 0.343311 |
| 51439 FAM8A1       | 25.33807 | 1.126633 | 0.527781 | 2.13466  | 0.032789 | 0.34502  |
| 93185 IGSF8        | 9.115775 | 1.756479 | 0.823125 | 2.133916 | 0.03285  | 0.34502  |
| 9903 KLHL21        | 40.16451 | 1.125699 | 0.528528 | 2.129875 | 0.033182 | 0.345316 |
| 728877 LOC728877   | 20.2019  | -1.23044 | 0.577687 | -2.12995 | 0.033176 | 0.345316 |
| 142940 TRUB1       | 10.60897 | 1.54376  | 0.724372 | 2.13117  | 0.033075 | 0.345316 |
| 1E+08 LOC100133    | 23.95196 | 1.225358 | 0.574501 | 2.132909 | 0.032932 | 0.345316 |
| 2935 GSPT1         | 49.70204 | -1.05798 | 0.496366 | -2.13145 | 0.033052 | 0.345316 |
| 7832 BTG2          | 54.53147 | 1.315451 | 0.617695 | 2.129611 | 0.033204 | 0.345316 |
| 147807 ZNF524      | 18.14122 | 1.454208 | 0.682897 | 2.12947  | 0.033215 | 0.345316 |
| 4923 NTSR1         | 7.941022 | 1.993445 | 0.935828 | 2.13014  | 0.03316  | 0.345316 |
| 3579 CXCR2         | 362.8723 | 1.117242 | 0.524034 | 2.132003 | 0.033007 | 0.345316 |
| 7421 VDR           | 38.13262 | 1.167677 | 0.549014 | 2.126861 | 0.033432 | 0.346391 |
| 1198 CLK3          | 21.63561 | 1.445875 | 0.679732 | 2.127126 | 0.03341  | 0.346391 |
| 124359 CDYL2       | 32.61697 | -1.09962 | 0.517402 | -2.12528 | 0.033563 | 0.346841 |
| 6535 SLC6A8        | 95.47137 | 1.268594 | 0.597085 | 2.124645 | 0.033616 | 0.346841 |
| 55246 CCDC25       | 23.2499  | 1.101659 | 0.519042 | 2.122485 | 0.033797 | 0.348033 |
| 3820 KLRB1         | 46.42478 | 1.140851 | 0.537494 | 2.122536 | 0.033793 | 0.348033 |
| 4478 MSN           | 1383.018 | 1.073092 | 0.505671 | 2.122116 | 0.033828 | 0.348033 |
| 9618 TRAF4         | 9.379654 | 1.631348 | 0.769243 | 2.120719 | 0.033945 | 0.348772 |

|          |           |          |          |          |          |          |          |
|----------|-----------|----------|----------|----------|----------|----------|----------|
| 78992    | YIPF2     | 25.71586 | 1.284676 | 0.606469 | 2.11829  | 0.034151 | 0.350293 |
| 1E+08    | DSTNP3    | 9.903343 | 2.438574 | 1.151502 | 2.117734 | 0.034198 | 0.350482 |
| 29105    | CFAP20    | 9.118035 | 1.764426 | 0.834825 | 2.113527 | 0.034556 | 0.353692 |
| 1667     | DEFA1     | 47.07637 | 1.251538 | 0.593208 | 2.109779 | 0.034877 | 0.355192 |
| 7038     | TG        | 34.35047 | 1.00726  | 0.477458 | 2.109629 | 0.03489  | 0.355192 |
| 6730     | SRP68     | 23.90347 | 1.251438 | 0.592876 | 2.110793 | 0.03479  | 0.355192 |
| 8476     | CDC42BPA  | 19.65997 | -1.46405 | 0.693847 | -2.11005 | 0.034854 | 0.355192 |
| 57140    | RNPEPL1   | 90.54771 | 1.131484 | 0.53629  | 2.109834 | 0.034873 | 0.355192 |
| 65083    | NOL6      | 9.028611 | 1.678135 | 0.79576  | 2.108846 | 0.034958 | 0.355308 |
| 474344   | GIMAP6    | 37.46233 | 1.139029 | 0.541583 | 2.103147 | 0.035453 | 0.358559 |
| 432369   | ATP5EP2   | 30.12103 | 1.100855 | 0.523594 | 2.102496 | 0.03551  | 0.358839 |
| 8818     | DPM2      | 16.22629 | 1.548973 | 0.737363 | 2.100693 | 0.035668 | 0.359255 |
| 1824     | DSC2      | 23.81701 | 1.688417 | 0.803622 | 2.101009 | 0.03564  | 0.359255 |
| 387694   | SH2D4B    | 8.517004 | -1.82307 | 0.868047 | -2.1002  | 0.035711 | 0.359394 |
| 115827   | RAB3C     | 13.76691 | -1.4711  | 0.701345 | -2.09755 | 0.035945 | 0.359431 |
| 55698    | RADIL     | 7.601687 | -1.93771 | 0.923795 | -2.09756 | 0.035944 | 0.359431 |
| 813      | CALU      | 41.98605 | -1.02729 | 0.48974  | -2.09762 | 0.035939 | 0.359431 |
| 114836   | SLAMF6    | 27.67799 | 1.051883 | 0.50106  | 2.099316 | 0.035789 | 0.359431 |
| 25827    | FBXL2     | 9.793555 | -1.58689 | 0.756491 | -2.0977  | 0.035932 | 0.359431 |
| 8626     | TP63      | 14.12742 | -1.30018 | 0.62006  | -2.09687 | 0.036005 | 0.359438 |
| 22871    | NLGN1     | 21.5822  | -1.15095 | 0.549168 | -2.09581 | 0.036099 | 0.359758 |
| 1016     | CDH18     | 25.34319 | -1.05104 | 0.50161  | -2.09534 | 0.03614  | 0.359881 |
| 57326    | PBXIP1    | 223.9677 | 1.009631 | 0.482108 | 2.0942   | 0.036242 | 0.360135 |
| 56061    | UBFD1     | 10.96003 | 1.594169 | 0.761997 | 2.092092 | 0.03643  | 0.361593 |
| 9278     | ZBTB22    | 8.365597 | 1.666153 | 0.79763  | 2.08888  | 0.036719 | 0.363866 |
| 64897    | C12orf43  | 12.20118 | 1.401821 | 0.67108  | 2.088904 | 0.036716 | 0.363866 |
| 57171    | DOLPP1    | 8.078406 | 1.945653 | 0.932036 | 2.08753  | 0.03684  | 0.364778 |
| 118487   | CHCHD1    | 20.81932 | 1.333028 | 0.63878  | 2.086836 | 0.036903 | 0.365105 |
| 728358   | DEFA1B    | 46.76755 | 1.238105 | 0.593942 | 2.084556 | 0.03711  | 0.366559 |
| 9569     | GTF2IRD1  | 24.07694 | -1.27243 | 0.611751 | -2.07998 | 0.037528 | 0.367612 |
| 80310    | PDGFD     | 39.05935 | -1.02542 | 0.493074 | -2.07964 | 0.037558 | 0.367612 |
| 1.03E+08 | LOC102724 | 12.55133 | 1.635089 | 0.786298 | 2.079478 | 0.037573 | 0.367612 |
| 388077   | IGHV1OR1  | 12.55133 | 1.635089 | 0.786298 | 2.079478 | 0.037573 | 0.367612 |
| 7090     | TLE3      | 205.0231 | 1.10363  | 0.530478 | 2.080442 | 0.037485 | 0.367612 |
| 780      | DDR1      | 10.80639 | 1.796721 | 0.865334 | 2.076332 | 0.037863 | 0.369249 |
| 3006     | HIST1H1C  | 25.62683 | 1.197875 | 0.578187 | 2.071778 | 0.038286 | 0.371603 |
| 4521     | NUDT1     | 24.49278 | 1.314626 | 0.634521 | 2.07184  | 0.03828  | 0.371603 |
| 375593   | TRIM73    | 16.50231 | 1.603064 | 0.773901 | 2.071406 | 0.038321 | 0.371631 |
| 389362   | PSMG4     | 22.37149 | 1.156722 | 0.55959  | 2.067086 | 0.038726 | 0.37351  |
| 4651     | MYO10     | 24.77388 | -1.19873 | 0.580091 | -2.06645 | 0.038786 | 0.373794 |
| 79874    | RABEP2    | 19.23257 | -1.13719 | 0.550639 | -2.06522 | 0.038902 | 0.374328 |
| 23547    | LILRA4    | 15.18306 | 1.468896 | 0.711179 | 2.065437 | 0.038882 | 0.374328 |
| 50848    | F11R      | 57.89335 | 1.171507 | 0.567434 | 2.064569 | 0.038964 | 0.374544 |
| 80325    | ABTB1     | 57.54533 | 1.420643 | 0.688388 | 2.063724 | 0.039044 | 0.374784 |
| 133015   | PACRGL    | 24.27401 | -1.24804 | 0.604837 | -2.06343 | 0.039072 | 0.374784 |
| 55657    | ZNF692    | 21.31159 | 1.535597 | 0.744338 | 2.063037 | 0.039109 | 0.374849 |
| 151613   | TTC14     | 59.63703 | 1.00381  | 0.486768 | 2.062192 | 0.039189 | 0.375326 |
| 54855    | FAM46C    | 41.42089 | 1.408114 | 0.683114 | 2.061316 | 0.039273 | 0.375832 |
| 168544   | ZNF467    | 31.53939 | 1.348959 | 0.654905 | 2.059778 | 0.03942  | 0.376651 |
| 1.03E+08 | LOC102724 | 10.06424 | 1.574364 | 0.764733 | 2.05871  | 0.039522 | 0.376674 |
| 4343     | MOV10     | 27.93559 | 1.32422  | 0.643303 | 2.058471 | 0.039545 | 0.376674 |
| 3250     | HPR       | 12.44509 | 1.360613 | 0.660893 | 2.05875  | 0.039518 | 0.376674 |
| 1.01E+08 | SLFN12L   | 55.17047 | 1.116341 | 0.542167 | 2.059035 | 0.039491 | 0.376674 |
| 149345   | SHISA4    | 23.01853 | 3.227125 | 1.569392 | 2.05629  | 0.039755 | 0.378098 |

|          |           |          |          |          |          |          |          |
|----------|-----------|----------|----------|----------|----------|----------|----------|
| 57731    | SPTBN4    | 12.52988 | -1.50308 | 0.731081 | -2.05596 | 0.039786 | 0.378098 |
| 8509     | NDST2     | 23.18998 | 1.137125 | 0.553651 | 2.053868 | 0.039988 | 0.379427 |
| 2648     | KAT2A     | 19.58784 | 1.163195 | 0.566439 | 2.053522 | 0.040022 | 0.379452 |
| 8804     | CREG1     | 9.901337 | 1.589359 | 0.775024 | 2.050723 | 0.040294 | 0.381441 |
| 337875   | HIST2H2B  | 9.194263 | 1.572796 | 0.7671   | 2.050315 | 0.040334 | 0.381512 |
| 55365    | TMEM176A  | 12.25065 | 2.10335  | 1.026732 | 2.048587 | 0.040502 | 0.382236 |
| 10153    | CEBPZ     | 24.24331 | 1.045013 | 0.510553 | 2.046827 | 0.040675 | 0.382688 |
| 10221    | TRIB1     | 43.36408 | 1.08389  | 0.529878 | 2.045545 | 0.040801 | 0.382829 |
| 1026     | CDKN1A    | 25.75253 | 1.399559 | 0.685131 | 2.042761 | 0.041076 | 0.383522 |
| 252839   | TMEM9     | 19.16627 | 1.396402 | 0.683769 | 2.042214 | 0.04113  | 0.383737 |
| 10965    | ACOT2     | 12.44144 | 1.400033 | 0.685948 | 2.04102  | 0.041249 | 0.384348 |
| 4685     | NCAM2     | 14.11167 | -1.38648 | 0.679381 | -2.04079 | 0.041272 | 0.384348 |
| 7319     | UBE2A     | 11.39351 | 1.408118 | 0.690048 | 2.040609 | 0.04129  | 0.384348 |
| 51389    | RWDD1     | 15.69934 | 1.426856 | 0.700127 | 2.037997 | 0.04155  | 0.385486 |
| 54442    | KCTD5     | 36.02883 | 1.128192 | 0.55363  | 2.03781  | 0.041569 | 0.385486 |
| 93081    | TEX30     | 8.738415 | -1.78017 | 0.874136 | -2.03649 | 0.041701 | 0.386126 |
| 80349    | WDR61     | 30.16414 | 1.024878 | 0.503193 | 2.036751 | 0.041675 | 0.386126 |
| 26355    | FAM162A   | 24.72923 | 1.097731 | 0.539559 | 2.034496 | 0.041902 | 0.38638  |
| 57143    | ADCK1     | 29.43672 | -1.00744 | 0.495097 | -2.03483 | 0.041868 | 0.38638  |
| 54915    | YTHDF1    | 55.02832 | 1.022785 | 0.50275  | 2.034379 | 0.041913 | 0.38638  |
| 159013   | CXorf38   | 30.63137 | 1.046248 | 0.515595 | 2.029202 | 0.042438 | 0.389668 |
| 5269     | SERPINB6  | 25.26179 | 1.107526 | 0.54685  | 2.025281 | 0.042838 | 0.391931 |
| 400027   | LINC00938 | 9.526383 | 1.572366 | 0.776326 | 2.025393 | 0.042827 | 0.391931 |
| 1509     | CTSD      | 1321.722 | 1.013258 | 0.50087  | 2.022996 | 0.043074 | 0.393495 |
| 7423     | VEGFB     | 13.54171 | 1.31698  | 0.65159  | 2.021177 | 0.043261 | 0.394316 |
| 80326    | WNT10A    | 11.22785 | 1.679482 | 0.831038 | 2.020944 | 0.043286 | 0.394316 |
| 755      | C21orf2   | 38.23067 | 1.1082   | 0.54932  | 2.017403 | 0.043653 | 0.395231 |
| 83607    | AMMECR1L  | 23.56568 | 1.058214 | 0.52463  | 2.017065 | 0.043689 | 0.395231 |
| 2257     | FGF12     | 17.71691 | -1.21895 | 0.604567 | -2.01624 | 0.043775 | 0.395305 |
| 6427     | SRSF2     | 51.6     | 1.0154   | 0.503716 | 2.015818 | 0.043819 | 0.395305 |
| 823      | CAPN1     | 165.3621 | 1.055475 | 0.524525 | 2.012249 | 0.044194 | 0.398392 |
| 196463   | PLBD2     | 18.18095 | -1.21496 | 0.603948 | -2.0117  | 0.044251 | 0.39862  |
| 84245    | MRI1      | 12.50368 | 1.391448 | 0.691892 | 2.011076 | 0.044317 | 0.398921 |
| 55738    | ARFGAP1   | 49.07523 | 1.24605  | 0.620493 | 2.008162 | 0.044626 | 0.400006 |
| 3312     | HSPA8     | 184.9145 | 1.006471 | 0.501475 | 2.007021 | 0.044747 | 0.400444 |
| 134430   | WDR36     | 21.77766 | 1.155613 | 0.576073 | 2.00602  | 0.044854 | 0.400557 |
| 7071     | KLF10     | 9.049111 | 1.758031 | 0.876489 | 2.005766 | 0.044881 | 0.400557 |
| 728005   | CTGLF9P   | 11.83597 | -1.52105 | 0.758488 | -2.00537 | 0.044923 | 0.400557 |
| 27018    | NGFRAP1   | 32.2006  | 1.349617 | 0.673751 | 2.003139 | 0.045162 | 0.402105 |
| 83638    | C11orf68  | 24.05126 | 1.454144 | 0.726399 | 2.001852 | 0.045301 | 0.402752 |
| 25977    | NECAP1    | 20.71391 | 1.173573 | 0.586538 | 2.000849 | 0.045409 | 0.403421 |
| 10262    | SF3B4     | 7.474836 | 1.780316 | 0.890615 | 1.998973 | 0.045611 | 0.404343 |
| 912      | CD1D      | 9.046049 | 1.613908 | 0.807515 | 1.998611 | 0.04565  | 0.404399 |
| 7321     | UBE2D1    | 34.73863 | 1.044873 | 0.523124 | 1.99737  | 0.045785 | 0.404714 |
| 55565    | ZNF821    | 26.06035 | -1.0156  | 0.50845  | -1.99744 | 0.045777 | 0.404714 |
| 199675   | MCEMP1    | 35.76469 | 1.181243 | 0.591539 | 1.996897 | 0.045836 | 0.404877 |
| 65005    | MRPL9     | 8.387947 | 1.564992 | 0.784099 | 1.995912 | 0.045943 | 0.40524  |
| 1.05E+08 | SPDYE15P  | 11.51746 | -1.54894 | 0.777619 | -1.9919  | 0.046383 | 0.407921 |
| 57456    | KIAA1143  | 45.48196 | 1.130539 | 0.567956 | 1.990541 | 0.046531 | 0.407921 |
| 641776   | SPDYE14P  | 10.96225 | -1.6629  | 0.836117 | -1.98883 | 0.04672  | 0.408856 |
| 282991   | BLOC1S2   | 60.3352  | 1.108191 | 0.557139 | 1.989072 | 0.046693 | 0.408856 |
| 1856     | DVL2      | 35.55448 | 1.605806 | 0.807891 | 1.987651 | 0.04685  | 0.409124 |
| 10158    | PDZK1IP1  | 34.81652 | 1.319414 | 0.664104 | 1.986757 | 0.046949 | 0.409697 |
| 7803     | PTP4A1    | 61.41565 | 1.13161  | 0.569853 | 1.985793 | 0.047056 | 0.410048 |

|          |          |          |          |          |          |          |          |
|----------|----------|----------|----------|----------|----------|----------|----------|
| 23165    | NUP205   | 36.58116 | -1.0207  | 0.514265 | -1.98478 | 0.047169 | 0.41045  |
| 10807    | SDCCAG3  | 21.24532 | 1.284212 | 0.647953 | 1.981952 | 0.047485 | 0.412026 |
| 123879   | DCUN1D3  | 17.64757 | -1.27036 | 0.640887 | -1.9822  | 0.047457 | 0.412026 |
| 3099     | HK2      | 36.95934 | 1.070024 | 0.539882 | 1.981959 | 0.047484 | 0.412026 |
| 1.05E+08 | LOC10537 | 51.43839 | -1.05568 | 0.533349 | -1.97934 | 0.047778 | 0.413466 |
| 389792   | IER5L    | 8.080349 | 1.772085 | 0.896637 | 1.976369 | 0.048113 | 0.414258 |
| 1872     | E2F3P1   | 20.36668 | 1.145613 | 0.579609 | 1.976525 | 0.048095 | 0.414258 |
| 285141   | ERIC2    | 16.45216 | 1.360914 | 0.689634 | 1.973387 | 0.048451 | 0.416333 |
| 8407     | TAGLN2   | 1509.805 | 1.061777 | 0.538632 | 1.971248 | 0.048696 | 0.417517 |
| 3116     | HLA-DPB2 | 9.128563 | -1.68066 | 0.852936 | -1.97045 | 0.048787 | 0.417805 |
| 7570     | ZNF22    | 14.20093 | 1.361037 | 0.690982 | 1.969715 | 0.048871 | 0.417805 |
| 10452    | TOMM40   | 11.07254 | 1.391967 | 0.706642 | 1.969833 | 0.048858 | 0.417805 |
| 27166    | PRELID1  | 21.97793 | 1.349208 | 0.685646 | 1.967791 | 0.049092 | 0.418288 |
| 284837   | AATBC    | 23.69261 | 1.025767 | 0.52222  | 1.964241 | 0.049502 | 0.419742 |
| 121273   | C12orf54 | 8.70735  | 1.897582 | 0.96814  | 1.960029 | 0.049992 | 0.42317  |
| 1E+08    | RPS27P9  | 3.688232 | 3.443047 | 1.452734 | 2.370047 | 0.017786 | NA       |
| 5352     | PLOD2    | 6.135013 | -1.83797 | 0.919524 | -1.99883 | 0.045627 | NA       |
| 3280     | HES1     | 3.419204 | 5.265002 | 1.630836 | 3.228406 | 0.001245 | NA       |
| 133060   | OTOP1    | 3.811009 | -3.2498  | 1.448957 | -2.24285 | 0.024906 | NA       |
| 27065    | NSG1     | 5.952033 | 2.224988 | 1.072055 | 2.075442 | 0.037946 | NA       |
| 53409    | ATP5LP3  | 6.154262 | -4.10018 | 1.481826 | -2.76698 | 0.005658 | NA       |
| 2565     | GABRG1   | 3.343643 | 3.304762 | 1.529417 | 2.160798 | 0.030711 | NA       |
| 1.05E+08 | LOC10537 | 2.605432 | -3.75178 | 1.677226 | -2.23689 | 0.025293 | NA       |
| 59350    | RXFP1    | 6.568593 | -2.12423 | 0.95001  | -2.23601 | 0.025351 | NA       |
| 1E+08    | RPL21P51 | 3.995473 | 3.52549  | 1.39193  | 2.532807 | 0.011315 | NA       |
| 170690   | ADAMTS16 | 7.098816 | -2.55609 | 1.075343 | -2.377   | 0.017454 | NA       |
| 10884    | MRPS30   | 6.963175 | 2.105064 | 0.928254 | 2.267768 | 0.023343 | NA       |
| 1.05E+08 | LOC10537 | 1.444238 | -3.93884 | 1.999913 | -1.96951 | 0.048895 | NA       |
| 492311   | IGIP     | 2.305081 | 4.699074 | 1.783844 | 2.63424  | 0.008433 | NA       |
| 1.01E+08 | CICP15   | 4.517652 | 2.559631 | 1.194099 | 2.143567 | 0.032068 | NA       |
| 222698   | NKAPL    | 5.500226 | 2.006975 | 1.017769 | 1.971935 | 0.048617 | NA       |
| 1.01E+08 | FPGT-TNN | 4.767675 | 2.156475 | 1.089473 | 1.979374 | 0.047774 | NA       |
| 1E+08    | LOC10010 | 1.484721 | -3.97405 | 1.990445 | -1.99656 | 0.045873 | NA       |
| 1.02E+08 | LOC10192 | 3.169239 | 4.148141 | 1.607094 | 2.581144 | 0.009847 | NA       |
| 57212    | TP73-AS1 | 6.468768 | 2.338343 | 1.05211  | 2.222527 | 0.026248 | NA       |
| 347734   | SLC35B2  | 3.464413 | 4.257352 | 1.585421 | 2.685314 | 0.007246 | NA       |
| 7272     | TTK      | 1.604363 | -4.11211 | 2.002733 | -2.05325 | 0.040048 | NA       |
| 339448   | C1orf174 | 6.641204 | 1.97522  | 0.999232 | 1.976737 | 0.048071 | NA       |
| 68       | ACTBP8   | 2.400316 | -4.67252 | 1.740497 | -2.68459 | 0.007262 | NA       |
| 642741   | RPL3P7   | 3.245828 | 3.313781 | 1.628328 | 2.035082 | 0.041843 | NA       |
| 148418   | SAMD13   | 2.296493 | -3.5346  | 1.720695 | -2.05417 | 0.039959 | NA       |
| 6610     | SMPD2    | 5.869264 | 2.2197   | 0.998898 | 2.22215  | 0.026273 | NA       |
| 644303   | LOC64430 | 1.442217 | 4.047342 | 2.050851 | 1.973494 | 0.048439 | NA       |
| 285762   | LOC28576 | 2.946634 | 2.988253 | 1.511342 | 1.977218 | 0.048017 | NA       |
| 10370    | CITED2   | 3.935143 | 4.452905 | 1.561712 | 2.851296 | 0.004354 | NA       |
| 84624    | FNDC1    | 6.801475 | -1.85913 | 0.941346 | -1.97497 | 0.048272 | NA       |
| 644794   | LOC64479 | 1.659185 | 4.24023  | 2.154471 | 1.968108 | 0.049056 | NA       |
| 8468     | FKBP6    | 2.891999 | -2.97923 | 1.517327 | -1.96347 | 0.049591 | NA       |
| 54873    | PALMD    | 3.525337 | -4.19155 | 1.626077 | -2.57771 | 0.009946 | NA       |
| 391059   | FRRS1    | 5.898685 | -2.65392 | 1.192314 | -2.22586 | 0.026024 | NA       |
| 401397   | LINC0099 | 2.155433 | 3.551185 | 1.737659 | 2.043661 | 0.040987 | NA       |
| 10157    | AASS     | 6.95247  | 2.228845 | 0.940637 | 2.369505 | 0.017812 | NA       |
| 1.01E+08 | LOC10102 | 1.85363  | 4.396945 | 1.85688  | 2.367921 | 0.017888 | NA       |
| 29803    | REPIN1   | 6.135259 | 3.044606 | 1.09115  | 2.790273 | 0.005266 | NA       |

349136 WDR86 4. 497223 2. 613208 1. 136825 2. 29869 0. 021523 NA  
1. 01E+08 PRKAG2-A 3. 952499 2. 915248 1. 332405 2. 187959 0. 028673 NA  
257 ALX3 2. 564344 3. 809884 1. 680778 2. 266738 0. 023406 NA  
51435 SCARA3 6. 060527 -2. 03439 0. 962266 -2. 11416 0. 034502 NA  
203100 HTRA4 4. 919039 -2. 26817 1. 093351 -2. 07451 0. 038032 NA  
84933 C8orf76 4. 821935 2. 457537 1. 131375 2. 172168 0. 029843 NA  
1. 05E+08 LOC105374 4. 705805 2. 399022 1. 12178 2. 138585 0. 032469 NA  
4609 MYC 1. 596624 4. 194621 2. 003286 2. 093871 0. 036272 NA  
113655 MFSD3 2. 568853 4. 863517 1. 703756 2. 854586 0. 004309 NA  
7002 PRDX1P1 5. 745832 -2. 17965 1. 072357 -2. 03258 0. 042095 NA  
441391 RBMXP2 7. 232783 3. 825842 1. 471016 2. 600815 0. 0093 NA  
1. 05E+08 LOC105376 6. 339274 -2. 41234 1. 165991 -2. 06892 0. 038554 NA  
1. 05E+08 LOC105375 5. 196216 -3. 22347 1. 226215 -2. 6288 0. 008569 NA  
2189 FANCG 4. 018383 3. 664185 1. 447907 2. 530678 0. 011384 NA  
403323 LOC403323 5. 608241 4. 152611 1. 339255 3. 100686 0. 001931 NA  
1E+08 LOC100132 2. 612687 3. 874416 1. 834249 2. 112263 0. 034664 NA  
1E+08 UNQ6494 2. 60892 -4. 78838 1. 711653 -2. 79752 0. 00515 NA  
9858 PPP1R26 1. 604132 4. 200996 1. 969263 2. 133283 0. 032901 NA  
1. 02E+08 LOC101928 2. 587209 -3. 7452 1. 66366 -2. 25118 0. 024374 NA  
645203 TMEM14D 5. 483317 5. 964538 1. 529785 3. 898939 9. 66E-05 NA  
118932 ANKRD22 3. 609917 3. 428765 1. 544099 2. 22056 0. 026381 NA  
199953 TMEM201 3. 086768 3. 051512 1. 485416 2. 054315 0. 039945 NA  
79751 SLC25A22 6. 014161 3. 195418 1. 195212 2. 673517 0. 007506 NA  
56675 NRIP3 3. 957766 -3. 44766 1. 457867 -2. 36487 0. 018037 NA  
7119 TMSB4XP5 2. 306727 3. 602847 1. 723736 2. 090138 0. 036605 NA  
56834 GPR137 6. 091102 2. 76252 1. 152935 2. 396076 0. 016572 NA  
728975 LOC728975 3. 964516 3. 560867 1. 450468 2. 454978 0. 014089 NA  
84285 EIF1AD 7. 213134 2. 322372 0. 971941 2. 389415 0. 016875 NA  
8722 CTSF 6. 976147 2. 649188 0. 938334 2. 82329 0. 004753 NA  
9828 ARHGEF17 2. 236776 4. 679837 1. 875956 2. 494641 0. 012608 NA  
684959 SNORA25 1. 781801 4. 328903 2. 085177 2. 076037 0. 037891 NA  
729494 ARPC3P3 3. 172208 5. 160973 1. 634701 3. 157135 0. 001593 NA  
1E+08 ATF4P4 3. 772181 -2. 77463 1. 368713 -2. 02718 0. 042644 NA  
283174 MIR4697H 6. 70052 2. 81807 1. 054018 2. 673646 0. 007503 NA  
9052 GPRC5A 2. 934551 -3. 91385 1. 625127 -2. 40834 0. 016025 NA  
114785 MBD6 3. 647727 2. 834977 1. 380616 2. 053414 0. 040032 NA  
196403 DTX3 6. 635998 6. 244889 1. 481159 4. 216219 2. 48E-05 NA  
1. 05E+08 LOC105372 2. 324732 -3. 52937 1. 719494 -2. 05256 0. 040115 NA  
1. 05E+08 LOC105369 1. 673084 -4. 14169 1. 916713 -2. 16083 0. 030708 NA  
84747 UNC119B 6. 164576 2. 880892 1. 071224 2. 689347 0. 007159 NA  
28984 RGCC 5. 547161 3. 314284 1. 205422 2. 749481 0. 005969 NA  
6846 XCL2 2. 885943 3. 093781 1. 535771 2. 01448 0. 043959 NA  
4247 MGAT2 3. 41087 2. 611423 1. 292447 2. 020526 0. 043329 NA  
9240 PNMA1 2. 476264 4. 820084 1. 721882 2. 799312 0. 005121 NA  
283596 SNHG10 2. 502028 4. 815278 1. 740839 2. 766068 0. 005674 NA  
64423 INF2 6. 347358 2. 134799 1. 062097 2. 009985 0. 044433 NA  
122618 PLD4 1. 606634 4. 202741 1. 978621 2. 124077 0. 033664 NA  
1. 05E+08 LOC105370 2. 257429 -3. 5144 1. 781442 -1. 97278 0. 04852 NA  
64843 ISL2 7. 059308 2. 040265 0. 993962 2. 05266 0. 040106 NA  
1. 05E+08 LOC105373 3. 602092 -3. 26293 1. 486479 -2. 19507 0. 028159 NA  
643707 GOLGA6L4 5. 186623 -2. 32921 1. 045492 -2. 22786 0. 02589 NA  
1. 03E+08 LOC102722 2. 479263 -4. 71174 1. 732775 -2. 71919 0. 006544 NA  
374650 GOLGA6L5 6. 41488 -1. 86767 0. 921937 -2. 02581 0. 042784 NA  
283951 C16orf91 2. 521803 3. 789478 1. 711492 2. 214137 0. 026819 NA

146110 RPL7P47 6. 460585 2. 927604 1. 253976 2. 334658 0. 019561 NA  
79724 ZNF768 4. 938391 3. 190028 1. 247566 2. 557001 0. 010558 NA  
4501 MT1X 3. 354882 5. 232514 1. 696039 3. 085137 0. 002035 NA  
29070 CCDC113 5. 691575 -2. 15506 1. 066361 -2. 02095 0. 043285 NA  
79007 DBNDD1 5. 663408 2. 334888 1. 163141 2. 007399 0. 044707 NA  
1. 05E+08 LOC10537 2. 135023 -4. 51845 1. 807996 -2. 49915 0. 012449 NA  
10462 CLEC10A 7. 019107 3. 399365 1. 11477 3. 049386 0. 002293 NA  
1. 02E+08 LOC10192 3. 276101 4. 203412 1. 589373 2. 644698 0. 008176 NA  
1. 05E+08 LOC10537 3. 480197 2. 656704 1. 293255 2. 054276 0. 039949 NA  
8557 TCAP 3. 217914 3. 130395 1. 544979 2. 026173 0. 042747 NA  
317719 KLHL10 4. 337469 -2. 38546 1. 194901 -1. 99637 0. 045894 NA  
8639 AOC3 4. 6386 2. 644166 1. 230055 2. 149632 0. 031584 NA  
2535 FZD2 7. 004084 2. 617772 0. 950681 2. 753576 0. 005895 NA  
342538 NACA2 3. 872002 2. 744687 1. 379514 1. 989605 0. 046634 NA  
9021 SOCS3 6. 154898 4. 173184 1. 320562 3. 160158 0. 001577 NA  
729602 NPIPBP1 6. 761429 -2. 69281 1. 039314 -2. 59095 0. 009571 NA  
5366 PMAIP1 4. 771277 2. 369262 1. 092958 2. 167752 0. 030178 NA  
69 ACTBP9 3. 265562 -3. 06531 1. 532072 -2. 00076 0. 045419 NA  
400668 PRSS57 4. 851638 -2. 70216 1. 286635 -2. 10017 0. 035714 NA  
1E+08 ZGLP1 2. 154937 4. 618039 1. 818391 2. 53963 0. 011097 NA  
401904 RPL23AP2 6. 28124 2. 115845 0. 960078 2. 203827 0. 027537 NA  
1. 02E+08 LOC10192 2. 432868 3. 714417 1. 741206 2. 133244 0. 032905 NA  
84964 ALKBH6 6. 149303 2. 722644 1. 039715 2. 618644 0. 008828 NA  
1556 CYP2B7P 1. 761042 4. 335921 1. 92539 2. 251971 0. 024324 NA  
1. 01E+08 LOC10050 2. 414941 3. 717371 1. 872451 1. 985297 0. 047111 NA  
147650 SPACA6P 7. 231312 2. 53387 0. 916949 2. 763369 0. 005721 NA  
400720 ZNF772 5. 451033 2. 318634 1. 077239 2. 152385 0. 031367 NA  
10520 ZNF211 3. 969206 2. 643981 1. 33097 1. 986507 0. 046977 NA  
1. 05E+08 LOC10537 7. 222655 2. 237753 0. 934847 2. 393711 0. 016679 NA  
85449 KIAA1755 3. 716117 -2. 56928 1. 305297 -1. 96835 0. 049028 NA  
671 BPI 3. 021598 4. 08966 1. 638801 2. 495519 0. 012577 NA  
6285 S100B 6. 139694 2. 497897 1. 197762 2. 08547 0. 037027 NA  
6576 SLC25A1 5. 280262 2. 207736 1. 110422 1. 988196 0. 04679 NA  
421 ARVCF 2. 40389 -3. 60629 1. 77606 -2. 0305 0. 042306 NA  
402055 SRRD 6. 095709 2. 377421 1. 04211 2. 281354 0. 022528 NA  
1. 05E+08 LOC10537 2. 191734 4. 652079 2. 023724 2. 298772 0. 021518 NA  
440836 ODF3B 5. 877838 2. 397024 1. 059051 2. 26337 0. 023613 NA  
8908 GYG2 2. 504286 3. 780366 1. 75402 2. 155258 0. 031142 NA  
349408 TLR8-AS1 5. 912165 2. 414198 1. 061405 2. 27453 0. 022934 NA  
1. 02E+08 LOC10192 5. 181317 -2. 75856 1. 158656 -2. 38083 0. 017274 NA  
2623 GATA1 4. 615987 2. 575634 1. 208152 2. 131879 0. 033017 NA  
645251 CBX1P1 1. 656682 4. 239121 1. 990971 2. 129173 0. 03324 NA  
1. 02E+08 LOC10192 2. 195716 4. 623041 1. 85614 2. 490675 0. 01275 NA  
1. 05E+08 LOC10537 5. 830262 -1. 94347 0. 969323 -2. 00498 0. 044965 NA  
57801 HES4 3. 310502 3. 174884 1. 493705 2. 12551 0. 033544 NA  
1. 05E+08 LOC10537 1. 489762 4. 086153 1. 994672 2. 048534 0. 040508 NA  
343381 NBPF2P 2. 157936 3. 55268 1. 737486 2. 044724 0. 040882 NA  
400963 RPS2P17 3. 155599 4. 112111 1. 618838 2. 540162 0. 01108 NA  
129303 TMEM150A 3. 770726 4. 388286 1. 561668 2. 81 0. 004954 NA  
1. 01E+08 LOC10050 3. 034174 -3. 03817 1. 519881 -1. 99895 0. 045614 NA  
7293 TNFRSF4 3. 146444 5. 16476 1. 62821 3. 172048 0. 001514 NA  
1. 05E+08 LOC10537 4. 38383 -2. 4854 1. 238732 -2. 00641 0. 044813 NA  
79727 LIN28A 2. 652978 -3. 75183 1. 671613 -2. 24444 0. 024804 NA  
55139 ANKZF1 5. 898049 1. 863313 0. 938523 1. 985367 0. 047104 NA



1.05E+08 LOC10537: 2.59629 -3.72769 1.68255 -2.2155 0.026726 NA  
729083 LOC72908:4.455035 2.469347 1.221796 2.02108 0.043272 NA  
1.03E+08 LOC10272:5.454871 2.664145 1.287301 2.069559 0.038494 NA  
8692 HYAL2 2.588628 3.840246 1.740587 2.206293 0.027363 NA
