# Supplementary material for: Genomic Expression Profiling and Bioinformatics Analysis of Chronic Recurrent Multifocal Osteomyelitis
Source: Hindawi journal article supplement (doi:10.1155/2021/6898093), 2021-01-01
Supplement: f7 [file 6898093.f7.pdf]

| Terms     | Counts | GeneRatio | BgRatio  | pValue   | FDR      | foldEnri | geneID           | geneSymbol | Category |
|-----------|--------|-----------|----------|----------|----------|----------|------------------|------------|----------|
| GO:001988 | 84     | 84/1117   | 341/2061 | 9.77E-33 | 3.07E-29 | 4.545166 | ENSG000001000000 | PSMB1/NA   | GO_BP    |
| GO:004800 | 83     | 83/1117   | 348/2061 | 2.84E-31 | 4.91E-28 | 4.400719 | ENSG000001000000 | PSMB1/NA   | GO_BP    |
| GO:000243 | 26     | 26/1117   | 60/2061  | 1.08E-17 | 3.51E-15 | 7.995524 | ENSG000001000000 | TAP2/NA    | GO_BP    |
| GO:001988 | 27     | 27/1117   | 77/2061  | 1.55E-15 | 3.10E-13 | 6.469904 | ENSG000001000000 | TAP2/NA    | GO_BP    |
| GO:002290 | 42     | 42/1117   | 203/2061 | 4.20E-14 | 4.95E-12 | 3.817491 | ENSG000001000000 | NDUFA7/C   | GO_BP    |
| GO:000641 | 41     | 41/1117   | 222/2061 | 4.24E-12 | 4.31E-10 | 3.407656 | ENSG000001000000 | RPL38/RPI  | GO_BP    |
| GO:000223 | 58     | 58/1117   | 406/2061 | 1.32E-11 | 1.24E-09 | 2.635887 | ENSG000001000000 | PSMB1/NA   | GO_BP    |
| GO:000250 | 36     | 36/1117   | 186/2061 | 2.12E-11 | 1.87E-09 | 3.571202 | ENSG000001000000 | IFI30/HL   | GO_BP    |
| GO:001598 | 47     | 47/1117   | 304/2061 | 7.85E-11 | 6.67E-09 | 2.852654 | ENSG000001000000 | NDUFA7/C   | GO_BP    |
| GO:009020 | 8      | 8/1117    | 13/2061  | 7.32E-08 | 4.57E-06 | 11.35459 | ENSG000001000000 | AIF1/NA    | GO_BP    |
| GO:009021 | 8      | 8/1117    | 13/2061  | 7.32E-08 | 4.57E-06 | 11.35459 | ENSG000001000000 | AIF1/NA    | GO_BP    |
| GO:002183 | 10     | 10/1117   | 22/2061  | 7.47E-08 | 4.61E-06 | 8.386913 | ENSG000001000000 | MBOAT7/N   | GO_BP    |
| GO:000191 | 22     | 22/1117   | 112/2061 | 1.26E-07 | 7.42E-06 | 3.624345 | ENSG000001000000 | HLA-A/NA   | GO_BP    |
| GO:003263 | 21     | 21/1117   | 104/2061 | 1.48E-07 | 8.44E-06 | 3.725725 | ENSG000001000000 | TMSB4X/F   | GO_BP    |
| GO:003132 | 23     | 23/1117   | 124/2061 | 1.96E-07 | 1.05E-05 | 3.422402 | ENSG000001000000 | HLA-A/NA   | GO_BP    |
| GO:007259 | 41     | 41/1117   | 316/2061 | 2.02E-07 | 1.07E-05 | 2.393986 | ENSG000001000000 | KLF2/AIF   | GO_BP    |
| GO:000183 | 44     | 44/1117   | 365/2061 | 5.91E-07 | 2.71E-05 | 2.224255 | ENSG000001000000 | TMSB4X/KI  | GO_BP    |
| GO:003263 | 29     | 29/1117   | 197/2061 | 9.28E-07 | 3.95E-05 | 2.716168 | ENSG000001000000 | KLF2/AIF   | GO_BP    |
| GO:005080 | 47     | 47/1117   | 409/2061 | 9.83E-07 | 4.14E-05 | 2.12031  | ENSG000001000000 | AIF1/NA    | GO_BP    |
| GO:000191 | 20     | 20/1117   | 111/2061 | 1.95E-06 | 7.59E-05 | 3.324542 | ENSG000001000000 | HLA-A/NA   | GO_BP    |
| GO:003410 | 24     | 24/1117   | 151/2061 | 2.01E-06 | 7.76E-05 | 2.932642 | ENSG000001000000 | KLF2/B2M   | GO_BP    |
| GO:005122 | 52     | 52/1117   | 495/2061 | 3.94E-06 | 0.000143 | 1.938309 | ENSG000001000000 | PANX2/UBI  | GO_BP    |
| GO:001490 | 6      | 6/1117    | 10/2061  | 4.35E-06 | 0.00015  | 11.07073 | ENSG000001000000 | AIF1/NA    | GO_BP    |
| GO:003263 | 15     | 15/1117   | 71/2061  | 4.86E-06 | 0.000164 | 3.898143 | ENSG000001000000 | TYROBP/I   | GO_BP    |
| GO:004348 | 29     | 29/1117   | 214/2061 | 5.06E-06 | 0.000167 | 2.500397 | ENSG000001000000 | PSMB1/NA   | GO_BP    |
| GO:190355 | 50     | 50/1117   | 476/2061 | 6.04E-06 | 0.000192 | 1.938152 | ENSG000001000000 | SDCBP/PAI  | GO_BP    |
| GO:001092 | 46     | 46/1117   | 424/2061 | 6.08E-06 | 0.000192 | 2.001782 | ENSG000001000000 | PSMB1/NA   | GO_BP    |
| GO:005060 | 37     | 37/1117   | 312/2061 | 6.69E-06 | 0.000209 | 2.188124 | ENSG000001000000 | TMSB4X/P   | GO_BP    |
| GO:000750 | 13     | 13/1117   | 57/2061  | 8.54E-06 | 0.000256 | 4.20817  | ENSG000001000000 | MMP9/CALI  | GO_BP    |
| GO:003210 | 42     | 42/1117   | 391/2061 | 1.94E-05 | 0.000507 | 1.981971 | ENSG000001000000 | TMSB4X/S   | GO_BP    |
| GO:007170 | 28     | 28/1117   | 218/2061 | 2.02E-05 | 0.000523 | 2.36988  | ENSG000001000000 | ADAM8/TYI  | GO_BP    |
| GO:190191 | 7      | 7/1117    | 19/2061  | 3.82E-05 | 0.000902 | 6.797814 | ENSG000001000000 | PPP1R10/I  | GO_BP    |
| GO:003059 | 31     | 31/1117   | 263/2061 | 4.09E-05 | 0.000956 | 2.174857 | ENSG000001000000 | S100A8/A   | GO_BP    |
| GO:000710 | 21     | 21/1117   | 147/2061 | 4.49E-05 | 0.001035 | 2.635887 | ENSG000001000000 | PSMB1/NA   | GO_BP    |
| GO:000269 | 38     | 38/1117   | 354/2061 | 4.81E-05 | 0.00108  | 1.980638 | ENSG000001000000 | HLA-A/NA   | GO_BP    |
| GO:004562 | 12     | 12/1117   | 59/2061  | 6.35E-05 | 0.001307 | 3.752788 | ENSG000001000000 | B2M/NA     | GO_BP    |
| GO:000251 | 9      | 9/1117    | 35/2061  | 7.67E-05 | 0.001553 | 4.744596 | ENSG000001000000 | WAS/CD74   | GO_BP    |
| GO:007149 | 38     | 38/1117   | 362/2061 | 7.77E-05 | 0.001567 | 1.936867 | ENSG000001000000 | LAMP2/GAI  | GO_BP    |
| GO:004671 | 7      | 7/1117    | 21/2061  | 8.01E-05 | 0.001585 | 6.150403 | ENSG000001000000 | LAMP2/GA   | GO_BP    |
| GO:007048 | 44     | 44/1117   | 443/2061 | 8.15E-05 | 0.001585 | 1.832626 | ENSG000001000000 | PSMB1/NA   | GO_BP    |
| GO:000150 | 8      | 8/1117    | 28/2061  | 8.52E-05 | 0.001631 | 5.271774 | ENSG000001000000 | BATF2/BCI  | GO_BP    |
| GO:000160 | 41     | 41/1117   | 407/2061 | 0.000103 | 0.001916 | 1.858721 | ENSG000001000000 | PSMB1/NA   | GO_BP    |
| GO:003412 | 11     | 11/1117   | 55/2061  | 0.000149 | 0.002618 | 3.690242 | ENSG000001000000 | ARRB2/LI   | GO_BP    |
| GO:005169 | 15     | 15/1117   | 94/2061  | 0.000154 | 0.002642 | 2.944342 | ENSG000001000000 | FTL/TMSB   | GO_BP    |
| GO:006070 | 13     | 13/1117   | 75/2061  | 0.000179 | 0.002987 | 3.198209 | ENSG000001000000 | FADD/TLR   | GO_BP    |
| GO:006072 | 7      | 7/1117    | 24/2061  | 0.000207 | 0.003337 | 5.381603 | ENSG000001000000 | DDR1/NA    | GO_BP    |
| GO:006131 | 7      | 7/1117    | 24/2061  | 0.000207 | 0.003337 | 5.381603 | ENSG000001000000 | DDR1/NA    | GO_BP    |
| GO:003160 | 31     | 31/1117   | 289/2061 | 0.000234 | 0.003709 | 1.979195 | ENSG000001000000 | LAMP2/GAI  | GO_BP    |
| GO:003292 | 35     | 35/1117   | 344/2061 | 0.000267 | 0.004075 | 1.877303 | ENSG000001000000 | AIF1/NA    | GO_BP    |
| GO:006201 | 46     | 46/1117   | 497/2061 | 0.000291 | 0.004413 | 1.707758 | ENSG000001000000 | PSMB1/NA   | GO_BP    |
| GO:000269 | 38     | 38/1117   | 387/2061 | 0.000305 | 0.00457  | 1.811747 | ENSG000001000000 | AIF1/NA    | GO_BP    |
| GO:003260 | 6      | 6/1117    | 19/2061  | 0.000368 | 0.00538  | 5.826697 | ENSG000001000000 | LILRA2/N   | GO_BP    |
| GO:200109 | 15     | 15/1117   | 102/2061 | 0.000386 | 0.005571 | 2.713413 | ENSG000001000000 | KLF2/AIF   | GO_BP    |

|           |    |         |          |          |          |          |                  |           |       |
|-----------|----|---------|----------|----------|----------|----------|------------------|-----------|-------|
| GO:004218 | 29 | 29/1117 | 272/2061 | 0.000405 | 0.005755 | 1.967224 | ENSG000001000000 | PSMB1/NA  | GO_BP |
| GO:000644 | 10 | 10/1117 | 52/2061  | 0.000414 | 0.005824 | 3.548309 | ENSG000001000000 | HSPA6/CD  | GO_BP |
| GO:007060 | 22 | 22/1117 | 185/2061 | 0.000451 | 0.006273 | 2.194198 | ENSG000001000000 | BST2/AIF  | GO_BP |
| GO:004593 | 7  | 7/1117  | 27/2061  | 0.00046  | 0.006337 | 4.783647 | ENSG000001000000 | RGS2/SRI  | GO_BP |
| GO:003134 | 25 | 25/1117 | 223/2061 | 0.000472 | 0.006487 | 2.068521 | ENSG000001000000 | HLA-A/NA  | GO_BP |
| GO:005160 | 29 | 29/1117 | 276/2061 | 0.000515 | 0.006934 | 1.938714 | ENSG000001000000 | IFITM2/R  | GO_BP |
| GO:004202 | 10 | 10/1117 | 54/2061  | 0.000568 | 0.007548 | 3.41689  | ENSG000001000000 | HSPA6/B2  | GO_BP |
| GO:003261 | 19 | 19/1117 | 152/2061 | 0.000582 | 0.007675 | 2.306401 | ENSG000001000000 | PANX2/CA  | GO_BP |
| GO:003052 | 32 | 32/1117 | 319/2061 | 0.000613 | 0.00795  | 1.850905 | ENSG000001000000 | PIM1/NFK  | GO_BP |
| GO:000961 | 36 | 36/1117 | 374/2061 | 0.000628 | 0.008076 | 1.776052 | ENSG000001000000 | IFITM2/R  | GO_BP |
| GO:003260 | 19 | 19/1117 | 153/2061 | 0.000631 | 0.008101 | 2.291327 | ENSG000001000000 | DHX58/IS  | GO_BP |
| GO:007060 | 30 | 30/1117 | 293/2061 | 0.00064  | 0.00819  | 1.889202 | ENSG000001000000 | BST2/AIF  | GO_BP |
| GO:001474 | 6  | 6/1117  | 21/2061  | 0.000671 | 0.008529 | 5.271774 | ENSG000001000000 | AIF1/NA   | GO_BP |
| GO:000191 | 23 | 23/1117 | 203/2061 | 0.000673 | 0.008536 | 2.090531 | ENSG000001000000 | HLA-A/NA  | GO_BP |
| GO:003164 | 32 | 32/1117 | 322/2061 | 0.000718 | 0.009032 | 1.83366  | ENSG000001000000 | LAMP2/PI  | GO_BP |
| GO:000230 | 21 | 21/1117 | 179/2061 | 0.000719 | 0.009032 | 2.164667 | ENSG000001000000 | BST2/B2M  | GO_BP |
| GO:003803 | 13 | 13/1117 | 87/2061  | 0.000792 | 0.009848 | 2.757077 | ENSG000001000000 | MCL1/FAD  | GO_BP |
| GO:003160 | 6  | 6/1117  | 22/2061  | 0.000881 | 0.010676 | 5.032148 | ENSG000001000000 | CARD16/L  | GO_BP |
| GO:000252 | 5  | 5/1117  | 15/2061  | 0.000881 | 0.010676 | 6.150403 | ENSG000001000000 | S100A8/A  | GO_BP |
| GO:005123 | 5  | 5/1117  | 15/2061  | 0.000881 | 0.010676 | 6.150403 | ENSG000001000000 | FTL/S100  | GO_BP |
| GO:009051 | 14 | 14/1117 | 99/2061  | 0.000887 | 0.010676 | 2.609262 | ENSG000001000000 | SLC25A5/I | GO_BP |
| GO:007121 | 29 | 29/1117 | 286/2061 | 0.00091  | 0.010928 | 1.870927 | ENSG000001000000 | CARD16/T  | GO_BP |
| GO:005092 | 19 | 19/1117 | 159/2061 | 0.001011 | 0.012053 | 2.204861 | ENSG000001000000 | TMSB4X/A  | GO_BP |
| GO:000268 | 19 | 19/1117 | 160/2061 | 0.001091 | 0.012822 | 2.191081 | ENSG000001000000 | AIF1/NA   | GO_BP |
| GO:007261 | 17 | 17/1117 | 137/2061 | 0.001201 | 0.013933 | 2.289566 | ENSG000001000000 | AIF1/NA   | GO_BP |
| GO:000251 | 6  | 6/1117  | 24/2061  | 0.001448 | 0.016067 | 4.612802 | ENSG000001000000 | HLA-DOB   | GO_BP |
| GO:006101 | 11 | 11/1117 | 71/2061  | 0.00145  | 0.016067 | 2.858638 | ENSG000001000000 | HSPA6/CR  | GO_BP |
| GO:000270 | 19 | 19/1117 | 166/2061 | 0.001687 | 0.018377 | 2.111885 | ENSG000001000000 | B2M/NA/S  | GO_BP |
| GO:005109 | 37 | 37/1117 | 410/2061 | 0.001713 | 0.018616 | 1.665109 | ENSG000001000000 | TMSB4X/C  | GO_BP |
| GO:190340 | 17 | 17/1117 | 142/2061 | 0.001782 | 0.019293 | 2.208948 | ENSG000001000000 | KLF2/AIF  | GO_BP |
| GO:000220 | 11 | 11/1117 | 73/2061  | 0.001827 | 0.019528 | 2.780319 | ENSG000001000000 | AIF1/NA   | GO_BP |
| GO:005122 | 33 | 33/1117 | 355/2061 | 0.001842 | 0.019655 | 1.715183 | ENSG000001000000 | FTL/TMSB  | GO_BP |
| GO:000709 | 21 | 21/1117 | 193/2061 | 0.001876 | 0.019931 | 2.007644 | ENSG000001000000 | DUSP1/MU  | GO_BP |
| GO:005170 | 27 | 27/1117 | 273/2061 | 0.001929 | 0.020456 | 1.824845 | ENSG000001000000 | IFITM2/D  | GO_BP |
| GO:009752 | 25 | 25/1117 | 249/2061 | 0.00227  | 0.023222 | 1.852531 | ENSG000001000000 | S100A8/A  | GO_BP |
| GO:000220 | 10 | 10/1117 | 65/2061  | 0.00248  | 0.025065 | 2.838647 | ENSG000001000000 | FADD/SIT  | GO_BP |
| GO:190370 | 23 | 23/1117 | 224/2061 | 0.002506 | 0.025178 | 1.894544 | ENSG000001000000 | ADAM8/TY  | GO_BP |
| GO:000268 | 24 | 24/1117 | 238/2061 | 0.002595 | 0.026027 | 1.860626 | ENSG000001000000 | AIF1/NA   | GO_BP |
| GO:190191 | 8  | 8/1117  | 45/2061  | 0.00261  | 0.026072 | 3.280215 | ENSG000001000000 | DUSP1/PP  | GO_BP |
| GO:009880 | 15 | 15/1117 | 123/2061 | 0.002697 | 0.026792 | 2.250147 | ENSG000001000000 | MGST3/AL  | GO_BP |
| GO:190351 | 26 | 26/1117 | 266/2061 | 0.002721 | 0.026887 | 1.803502 | ENSG000001000000 | TMSB4X/C  | GO_BP |
| GO:003431 | 7  | 7/1117  | 36/2061  | 0.002822 | 0.027658 | 3.587735 | ENSG000001000000 | ARF1/ZDH  | GO_BP |
| GO:004321 | 28 | 28/1117 | 295/2061 | 0.002922 | 0.028532 | 1.751301 | ENSG000001000000 | TMSB4X/C  | GO_BP |
| GO:000962 | 10 | 10/1117 | 67/2061  | 0.003117 | 0.029705 | 2.753912 | ENSG000001000000 | S100A8/S  | GO_BP |
| GO:004518 | 14 | 14/1117 | 113/2061 | 0.003181 | 0.030268 | 2.28599  | ENSG000001000000 | TMSB4X/T  | GO_BP |
| GO:000691 | 30 | 30/1117 | 327/2061 | 0.003509 | 0.032374 | 1.692771 | ENSG000001000000 | S100A8/L  | GO_BP |
| GO:004541 | 11 | 11/1117 | 80/2061  | 0.003814 | 0.034759 | 2.537041 | ENSG000001000000 | GPX1/NCF  | GO_BP |
| GO:000750 | 21 | 21/1117 | 206/2061 | 0.004095 | 0.036676 | 1.880948 | ENSG000001000000 | RGS2/MMP  | GO_BP |
| GO:004661 | 31 | 31/1117 | 347/2061 | 0.004498 | 0.039746 | 1.648379 | ENSG000001000000 | KLF2/S10  | GO_BP |
| GO:003220 | 12 | 12/1117 | 94/2061  | 0.004769 | 0.041713 | 2.355473 | ENSG000001000000 | PPP1R10   | GO_BP |
| GO:003590 | 23 | 23/1117 | 236/2061 | 0.004795 | 0.041856 | 1.798211 | ENSG000001000000 | CTDSP2/H  | GO_BP |
| GO:005092 | 24 | 24/1117 | 250/2061 | 0.004855 | 0.04224  | 1.771316 | ENSG000001000000 | TMSB4X/A  | GO_BP |
| GO:006190 | 11 | 11/1117 | 83/2061  | 0.005074 | 0.044069 | 2.445341 | ENSG000001000000 | AIF1/NA   | GO_BP |
| GO:000940 | 8  | 8/1117  | 50/2061  | 0.005121 | 0.044258 | 2.952193 | ENSG000001000000 | GMPR/NFK  | GO_BP |

|           |    |         |          |          |          |          |                  |                  |       |
|-----------|----|---------|----------|----------|----------|----------|------------------|------------------|-------|
| GO:000926 | 26 | 26/1117 | 279/2061 | 0.005132 | 0.044277 | 1.719467 | ENSG000001000000 | GMPR/HSP1        | GO_BP |
| GO:003261 | 11 | 11/1117 | 84/2061  | 0.005556 | 0.047339 | 2.41623  | ENSG000001000000 | IRF5/PRK1        | GO_BP |
| GO:000151 | 39 | 39/1117 | 470/2061 | 0.005589 | 0.04748  | 1.531058 | ENSG000001000000 | SDCBP/S100A8     | GO_BP |
| GO:005104 | 27 | 27/1117 | 295/2061 | 0.005595 | 0.04748  | 1.688755 | ENSG000001000000 | TMSB4X/C16orf67  | GO_BP |
| GO:004866 | 10 | 10/1117 | 74/2061  | 0.006426 | 0.053742 | 2.493407 | ENSG000001000000 | AIF1/NAI1        | GO_BP |
| GO:000270 | 8  | 8/1117  | 52/2061  | 0.006528 | 0.054416 | 2.838647 | ENSG000001000000 | BST2/HLA-DQA1    | GO_BP |
| GO:004571 | 12 | 12/1117 | 98/2061  | 0.006664 | 0.055464 | 2.259332 | ENSG000001000000 | ATRAID/C10orf101 | GO_BP |
| GO:003250 | 10 | 10/1117 | 75/2061  | 0.007064 | 0.057865 | 2.460161 | ENSG000001000000 | TMSB4X/T10orf101 | GO_BP |
| GO:000270 | 21 | 21/1117 | 218/2061 | 0.007767 | 0.062339 | 1.77741  | ENSG000001000000 | BST2/B2M         | GO_BP |
| GO:000301 | 14 | 14/1117 | 125/2061 | 0.007827 | 0.062718 | 2.066535 | ENSG000001000000 | AQP3/PSAI1       | GO_BP |
| GO:005160 | 8  | 8/1117  | 54/2061  | 0.008208 | 0.064682 | 2.733512 | ENSG000001000000 | AIF1/NAI1        | GO_BP |
| GO:004571 | 35 | 35/1117 | 426/2061 | 0.009648 | 0.074329 | 1.515944 | ENSG000001000000 | AIF1/NAI1        | GO_BP |
| GO:009008 | 5  | 5/1117  | 25/2061  | 0.009936 | 0.076099 | 3.690242 | ENSG000001000000 | HSPA1B/NF1       | GO_BP |
| GO:003166 | 6  | 6/1117  | 35/2061  | 0.010513 | 0.079574 | 3.163064 | ENSG000001000000 | CARD16/L1        | GO_BP |
| GO:003261 | 6  | 6/1117  | 35/2061  | 0.010513 | 0.079574 | 3.163064 | ENSG000001000000 | IRF4/L1L1        | GO_BP |
| GO:004216 | 6  | 6/1117  | 35/2061  | 0.010513 | 0.079574 | 3.163064 | ENSG000001000000 | TSPO/TME1        | GO_BP |
| GO:000759 | 31 | 31/1117 | 369/2061 | 0.010609 | 0.080187 | 1.550102 | ENSG000001000000 | DGKI/PRK1        | GO_BP |
| GO:003133 | 27 | 27/1117 | 313/2061 | 0.011851 | 0.087986 | 1.591638 | ENSG000001000000 | PFN1/ARP1        | GO_BP |
| GO:004209 | 6  | 6/1117  | 36/2061  | 0.012051 | 0.088755 | 3.075201 | ENSG000001000000 | HLX/CD74         | GO_BP |
| GO:005109 | 18 | 18/1117 | 188/2061 | 0.01382  | 0.098703 | 1.766605 | ENSG000001000000 | S100A8/C16orf67  | GO_BP |
| GO:003647 | 11 | 11/1117 | 96/2061  | 0.014718 | 0.103547 | 2.114201 | ENSG000001000000 | MCL1/PSAI1       | GO_BP |
| GO:009031 | 16 | 16/1117 | 162/2061 | 0.014927 | 0.104733 | 1.822342 | ENSG000001000000 | UBL5/OAZ1        | GO_BP |
| GO:200102 | 11 | 11/1117 | 97/2061  | 0.015815 | 0.109481 | 2.092405 | ENSG000001000000 | CDKN2D/PIG1      | GO_BP |
| GO:003260 | 12 | 12/1117 | 110/2061 | 0.016036 | 0.110715 | 2.012859 | ENSG000001000000 | S100A8/A16orf67  | GO_BP |
| GO:003016 | 17 | 17/1117 | 178/2061 | 0.016778 | 0.114922 | 1.762194 | ENSG000001000000 | DGKI/PRK1        | GO_BP |
| GO:005086 | 22 | 22/1117 | 249/2061 | 0.016846 | 0.114932 | 1.630227 | ENSG000001000000 | TYROBP/PIG1      | GO_BP |
| GO:005109 | 27 | 27/1117 | 325/2061 | 0.018536 | 0.123531 | 1.53287  | ENSG000001000000 | S100A8/C16orf67  | GO_BP |
| GO:004593 | 7  | 7/1117  | 51/2061  | 0.019416 | 0.127497 | 2.532519 | ENSG000001000000 | RGS2/PRO1        | GO_BP |
| GO:003250 | 6  | 6/1117  | 40/2061  | 0.019787 | 0.127976 | 2.767681 | ENSG000001000000 | CHMP2A/R1G1      | GO_BP |
| GO:000269 | 20 | 20/1117 | 224/2061 | 0.01982  | 0.127976 | 1.647429 | ENSG000001000000 | TYROBP/Z1G1      | GO_BP |
| GO:006075 | 20 | 20/1117 | 224/2061 | 0.01982  | 0.127976 | 1.647429 | ENSG000001000000 | CARD16/F1G1      | GO_BP |
| GO:003027 | 20 | 20/1117 | 227/2061 | 0.02251  | 0.142162 | 1.625657 | ENSG000001000000 | ATRAID/C10orf101 | GO_BP |
| GO:000237 | 13 | 13/1117 | 129/2061 | 0.022854 | 0.14416  | 1.859424 | ENSG000001000000 | STX4/TCF1        | GO_BP |
| GO:005092 | 9  | 9/1117  | 77/2061  | 0.023102 | 0.145368 | 2.156635 | ENSG000001000000 | AIF1/NAI1        | GO_BP |
| GO:000988 | 3  | 3/1117  | 12/2061  | 0.024174 | 0.147808 | 4.612802 | ENSG000001000000 | HMG1/BC1         | GO_BP |
| GO:001064 | 5  | 5/1117  | 31/2061  | 0.024333 | 0.148083 | 2.976001 | ENSG000001000000 | CALM3/SR1        | GO_BP |
| GO:006011 | 8  | 8/1117  | 66/2061  | 0.025739 | 0.153932 | 2.23651  | ENSG000001000000 | RGS2/ADC1        | GO_BP |
| GO:003157 | 17 | 17/1117 | 188/2061 | 0.026971 | 0.159854 | 1.66846  | ENSG000001000000 | MUS81/PPI1       | GO_BP |
| GO:005509 | 5  | 5/1117  | 32/2061  | 0.027592 | 0.162388 | 2.883001 | ENSG000001000000 | ITGB2/CD113      | GO_BP |
| GO:000164 | 21 | 21/1117 | 252/2061 | 0.03369  | 0.189052 | 1.537601 | ENSG000001000000 | ATRAID/C10orf101 | GO_BP |
| GO:007140 | 5  | 5/1117  | 34/2061  | 0.034907 | 0.194201 | 2.713413 | ENSG000001000000 | ITGB2/CD113      | GO_BP |
| GO:007026 | 8  | 8/1117  | 70/2061  | 0.03509  | 0.194592 | 2.10871  | ENSG000001000000 | FADD/PPI1        | GO_BP |
| GO:009854 | 3  | 3/1117  | 14/2061  | 0.036905 | 0.202916 | 3.95383  | ENSG000001000000 | TLR2/TLR1        | GO_BP |
| GO:003030 | 18 | 18/1117 | 210/2061 | 0.036998 | 0.203217 | 1.581532 | ENSG000001000000 | BST2/RGS1        | GO_BP |
| GO:004299 | 4  | 4/1117  | 24/2061  | 0.038341 | 0.208603 | 3.075201 | ENSG000001000000 | TMSB4X/N1G1      | GO_BP |
| GO:004866 | 12 | 12/1117 | 125/2061 | 0.038767 | 0.210465 | 1.771316 | ENSG000001000000 | MMP9/AIF1        | GO_BP |
| GO:007121 | 27 | 27/1117 | 348/2061 | 0.039341 | 0.212043 | 1.431559 | ENSG000001000000 | CARD16/F1G1      | GO_BP |
| GO:010400 | 27 | 27/1117 | 348/2061 | 0.039341 | 0.212043 | 1.431559 | ENSG000001000000 | CARD16/F1G1      | GO_BP |
| GO:000989 | 35 | 35/1117 | 474/2061 | 0.039853 | 0.214067 | 1.362431 | ENSG000001000000 | RILP/NAI1        | GO_BP |
| GO:007167 | 12 | 12/1117 | 127/2061 | 0.042963 | 0.227308 | 1.743421 | ENSG000001000000 | AIF1/NAI1        | GO_BP |
| GO:004336 | 5  | 5/1117  | 36/2061  | 0.043316 | 0.22825  | 2.562668 | ENSG000001000000 | SRF/CD74         | GO_BP |
| GO:003238 | 19 | 19/1117 | 229/2061 | 0.043363 | 0.22825  | 1.530886 | ENSG000001000000 | UBL5/OAZ1        | GO_BP |
| GO:004669 | 4  | 4/1117  | 25/2061  | 0.043752 | 0.228885 | 2.952193 | ENSG000001000000 | JUNB/BSG         | GO_BP |
| GO:000961 | 18 | 18/1117 | 216/2061 | 0.046602 | 0.238529 | 1.537601 | ENSG000001000000 | TXNIP/NF1        | GO_BP |

|           |    |         |           |          |          |          |                  |             |       |
|-----------|----|---------|-----------|----------|----------|----------|------------------|-------------|-------|
| GO:004309 | 5  | 5/1117  | 37/20610  | 0.047937 | 0.244156 | 2.493407 | ENSG000001000000 | GMPR/PNP    | GO_BP |
| GO:003476 | 13 | 13/1117 | 144/20610 | 0.049205 | 0.249635 | 1.665734 | ENSG000001000000 | RGS2/MMP9   | GO_BP |
| GO:003462 | 4  | 4/1117  | 26/20610  | 0.049567 | 0.250212 | 2.838647 | ENSG000001000000 | TNFAIP2/IGO | GO_BP |
| GO:007099 | 32 | 32/1117 | 436/20610 | 0.050958 | 0.256025 | 1.354217 | ENSG000001000000 | MCL1/ADA1   | GO_BP |
| GO:000979 | 9  | 9/1117  | 89/20610  | 0.051665 | 0.259019 | 1.865853 | ENSG000001000000 | HMG1/PY     | GO_BP |
| GO:000599 | 24 | 24/1117 | 311/20610 | 0.052303 | 0.259019 | 1.423887 | ENSG000001000000 | IRS2/WDR5   | GO_BP |
| GO:000178 | 3  | 3/1117  | 16/20610  | 0.052414 | 0.259019 | 3.459602 | ENSG000001000000 | HCAR2/CC1   | GO_BP |
| GO:190218 | 3  | 3/1117  | 16/20610  | 0.052414 | 0.259019 | 3.459602 | ENSG000001000000 | CHMP2A/DIG  | GO_BP |
| GO:003210 | 31 | 31/1117 | 423/20610 | 0.054871 | 0.268911 | 1.352216 | ENSG000001000000 | CARD16/AIF1 | GO_BP |
| GO:004390 | 19 | 19/1117 | 236/20610 | 0.055551 | 0.271218 | 1.485479 | ENSG000001000000 | IFITM2/BCL2 | GO_BP |
| GO:004580 | 16 | 16/1117 | 191/20610 | 0.055934 | 0.271807 | 1.545651 | ENSG000001000000 | HNRNPK/BCL2 | GO_BP |
| GO:000283 | 7  | 7/1117  | 64/20610  | 0.057305 | 0.27614  | 2.018101 | ENSG000001000000 | CARD16/DIG  | GO_BP |
| GO:004614 | 7  | 7/1117  | 64/20610  | 0.057305 | 0.27614  | 2.018101 | ENSG000001000000 | TSPO/APR1   | GO_BP |
| GO:004484 | 3  | 3/1117  | 17/20610  | 0.061164 | 0.289091 | 3.256096 | ENSG000001000000 | OPRL1/NA    | GO_BP |
| GO:005128 | 3  | 3/1117  | 17/20610  | 0.061164 | 0.289091 | 3.256096 | ENSG000001000000 | CALM3/SRF   | GO_BP |
| GO:190022 | 3  | 3/1117  | 17/20610  | 0.061164 | 0.289091 | 3.256096 | ENSG000001000000 | SRF/HMGC1   | GO_BP |
| GO:005077 | 19 | 19/1117 | 239/20610 | 0.061447 | 0.289375 | 1.466832 | ENSG000001000000 | BST2/DHX1   | GO_BP |
| GO:005122 | 19 | 19/1117 | 239/20610 | 0.061447 | 0.289375 | 1.466832 | ENSG000001000000 | TMSB4X/C1   | GO_BP |
| GO:002198 | 12 | 12/1117 | 135/20610 | 0.062876 | 0.293439 | 1.640107 | ENSG000001000000 | RHOA/SLC12  | GO_BP |
| GO:004866 | 16 | 16/1117 | 195/20610 | 0.064929 | 0.301123 | 1.513945 | ENSG000001000000 | MMP9/AIF1   | GO_BP |
| GO:003359 | 4  | 4/1117  | 29/20610  | 0.069416 | 0.31711  | 2.544994 | ENSG000001000000 | ZNF703/GIG  | GO_BP |
| GO:004865 | 16 | 16/1117 | 197/20610 | 0.069773 | 0.318463 | 1.498575 | ENSG000001000000 | MMP9/AIF1   | GO_BP |
| GO:000245 | 7  | 7/1117  | 67/20610  | 0.069984 | 0.318612 | 1.927738 | ENSG000001000000 | PSMB4/KDI   | GO_BP |
| GO:003426 | 6  | 6/1117  | 54/20610  | 0.070886 | 0.319327 | 2.050134 | ENSG000001000000 | CDC42SE1    | GO_BP |
| GO:190499 | 19 | 19/1117 | 245/20610 | 0.074504 | 0.333816 | 1.43091  | ENSG000001000000 | TMSB4X/C1   | GO_BP |
| GO:003368 | 4  | 4/1117  | 30/20610  | 0.076813 | 0.339247 | 2.460161 | ENSG000001000000 | ATRAID/RIG  | GO_BP |
| GO:007239 | 8  | 8/1117  | 83/20610  | 0.080289 | 0.349975 | 1.77843  | ENSG000001000000 | CARM1/PRK   | GO_BP |
| GO:001052 | 3  | 3/1117  | 19/20610  | 0.080525 | 0.349975 | 2.913349 | ENSG000001000000 | CALM3/SRF   | GO_BP |
| GO:009700 | 10 | 10/1117 | 112/20610 | 0.082448 | 0.356541 | 1.647429 | ENSG000001000000 | HNRNPK/AIG  | GO_BP |
| GO:000282 | 14 | 14/1117 | 172/20610 | 0.084456 | 0.362024 | 1.501843 | ENSG000001000000 | CARD16/DIG  | GO_BP |
| GO:003090 | 9  | 9/1117  | 99/20610  | 0.088212 | 0.373983 | 1.677383 | ENSG000001000000 | CALM3/COX   | GO_BP |
| GO:004259 | 16 | 16/1117 | 204/20610 | 0.088601 | 0.375322 | 1.447154 | ENSG000001000000 | LAMP2/GAIG  | GO_BP |
| GO:003255 | 28 | 28/1117 | 395/20610 | 0.089469 | 0.378384 | 1.307934 | ENSG000001000000 | TMSB4X/TIG  | GO_BP |
| GO:000269 | 16 | 16/1117 | 205/20610 | 0.091531 | 0.382734 | 1.440094 | ENSG000001000000 | BST2/DHX1   | GO_BP |
| GO:005089 | 7  | 7/1117  | 72/20610  | 0.094538 | 0.391516 | 1.793868 | ENSG000001000000 | AQP3/ADC3   | GO_BP |
| GO:000763 | 13 | 13/1117 | 160/20610 | 0.094804 | 0.391529 | 1.499161 | ENSG000001000000 | DGKI/EIF2   | GO_BP |
| GO:006201 | 13 | 13/1117 | 160/20610 | 0.094804 | 0.391529 | 1.499161 | ENSG000001000000 | TMSB4X/IIG  | GO_BP |
| GO:002240 | 24 | 24/1117 | 334/20610 | 0.097705 | 0.396341 | 1.325835 | ENSG000001000000 | AIF1/NA     | GO_BP |
| GO:003444 | 2  | 2/1117  | 10/20610  | 0.098924 | 0.396341 | 3.690242 | ENSG000001000000 | APOBR/LRIG  | GO_BP |
| GO:000197 | 8  | 8/1117  | 87/20610  | 0.09901  | 0.396341 | 1.696663 | ENSG000001000000 | ARRB2/HLA   | GO_BP |
| GO:008600 | 6  | 6/1117  | 59/20610  | 0.099066 | 0.396341 | 1.876394 | ENSG000001000000 | CALM3/SRF   | GO_BP |
| GO:190040 | 6  | 6/1117  | 59/20610  | 0.099066 | 0.396341 | 1.876394 | ENSG000001000000 | PSAP/GPX3   | GO_BP |
| GO:000709 | 19 | 19/1117 | 255/20610 | 0.10016  | 0.4001   | 1.374796 | ENSG000001000000 | CDKN2D/DIG  | GO_BP |
| GO:009006 | 23 | 23/1117 | 319/20610 | 0.100427 | 0.400856 | 1.330338 | ENSG000001000000 | AIF1/NA     | GO_BP |
| GO:200102 | 4  | 4/1117  | 33/20610  | 0.101229 | 0.402817 | 2.23651  | ENSG000001000000 | RGS2/PSAIG  | GO_BP |
| GO:000229 | 5  | 5/1117  | 46/20610  | 0.102006 | 0.404688 | 2.005566 | ENSG000001000000 | FFAR2/DEIG  | GO_BP |
| GO:005509 | 3  | 3/1117  | 21/20610  | 0.102167 | 0.404688 | 2.635887 | ENSG000001000000 | MT-ATP6/IG  | GO_BP |
| GO:005127 | 29 | 29/1117 | 419/20610 | 0.106098 | 0.417705 | 1.277053 | ENSG000001000000 | BST2/AIF1   | GO_BP |
| GO:001973 | 12 | 12/1117 | 148/20610 | 0.10661  | 0.419084 | 1.496044 | ENSG000001000000 | S100A8/L    | GO_BP |
| GO:004592 | 20 | 20/1117 | 274/20610 | 0.108904 | 0.426942 | 1.346804 | ENSG000001000000 | BST2/RGS2   | GO_BP |
| GO:004814 | 8  | 8/1117  | 89/20610  | 0.109217 | 0.426942 | 1.658536 | ENSG000001000000 | S100A6/F    | GO_BP |
| GO:000609 | 4  | 4/1117  | 34/20610  | 0.110072 | 0.427186 | 2.17073  | ENSG000001000000 | SDHC/FH     | GO_BP |
| GO:002198 | 4  | 4/1117  | 34/20610  | 0.110072 | 0.427186 | 2.17073  | ENSG000001000000 | SRF/SEMA4   | GO_BP |
| GO:004327 | 14 | 14/1117 | 180/20610 | 0.111279 | 0.430262 | 1.435094 | ENSG000001000000 | RGS2/MMP9   | GO_BP |

|           |    |         |           |          |          |          |                      |       |
|-----------|----|---------|-----------|----------|----------|----------|----------------------|-------|
| GO:190288 | 6  | 6/1117  | 61/20610  | 0.111775 | 0.431214 | 1.814873 | ENSG000001PSAP/GPX   | GO_BP |
| GO:000940 | 16 | 16/1117 | 212/20610 | 0.113749 | 0.434354 | 1.392544 | ENSG000001HSPA6/HSIG | GO_BP |
| GO:190560 | 2  | 2/1117  | 11/20610  | 0.116712 | 0.435046 | 3.354765 | ENSG000001ABHD17A/1  | GO_BP |
| GO:190592 | 2  | 2/1117  | 11/20610  | 0.116712 | 0.435046 | 3.354765 | ENSG000001RETN/CITIG | GO_BP |
| GO:005138 | 6  | 6/1117  | 62/20610  | 0.118425 | 0.439538 | 1.785601 | ENSG000001CALM3/GN   | GO_BP |
| GO:009890 | 4  | 4/1117  | 35/20610  | 0.119246 | 0.43975  | 2.10871  | ENSG000001KCNE3/BI   | GO_BP |
| GO:000697 | 8  | 8/1117  | 91/20610  | 0.119976 | 0.441147 | 1.622084 | ENSG000001TSC22D4/   | GO_BP |
| GO:003132 | 8  | 8/1117  | 91/20610  | 0.119976 | 0.441147 | 1.622084 | ENSG000001ARRB2/HL   | GO_BP |
| GO:004390 | 20 | 20/1117 | 278/20610 | 0.120774 | 0.442868 | 1.327425 | ENSG000001IFITM2/B   | GO_BP |
| GO:000978 | 19 | 19/1117 | 262/20610 | 0.12108  | 0.44336  | 1.338065 | ENSG000001ARRB2/RH   | GO_BP |
| GO:000307 | 33 | 33/1117 | 492/20610 | 0.121528 | 0.444518 | 1.237581 | ENSG000001RGS2/AIF   | GO_BP |
| GO:000652 | 29 | 29/1117 | 426/20610 | 0.122717 | 0.448088 | 1.256068 | ENSG000001PSMB1/NA   | GO_BP |
| GO:002152 | 15 | 15/1117 | 199/20610 | 0.123552 | 0.449873 | 1.390795 | ENSG000001KDM6B/RH   | GO_BP |
| GO:003297 | 28 | 28/1117 | 410/20610 | 0.124103 | 0.451561 | 1.260083 | ENSG000001TMSB4X/B   | GO_BP |
| GO:004347 | 21 | 21/1117 | 296/20610 | 0.126325 | 0.453521 | 1.309038 | ENSG000001SDF2/TME   | GO_BP |
| GO:004218 | 14 | 14/1117 | 184/20610 | 0.126391 | 0.453521 | 1.403896 | ENSG000001KLF2/AIF   | GO_BP |
| GO:000189 | 4  | 4/1117  | 36/20610  | 0.128737 | 0.459711 | 2.050134 | ENSG000001JUNB/BSG   | GO_BP |
| GO:004812 | 4  | 4/1117  | 36/20610  | 0.128737 | 0.459711 | 2.050134 | ENSG000001FTH1/EMD   | GO_BP |
| GO:009700 | 4  | 4/1117  | 36/20610  | 0.128737 | 0.459711 | 2.050134 | ENSG000001FLCN/MET   | GO_BP |
| GO:007142 | 11 | 11/1117 | 138/20610 | 0.129213 | 0.460776 | 1.470749 | ENSG000001SRSF1/U2   | GO_BP |
| GO:004819 | 7  | 7/1117  | 78/20610  | 0.1295   | 0.461481 | 1.655878 | ENSG000001SEC16A/R   | GO_BP |
| GO:006207 | 9  | 9/1117  | 108/20610 | 0.131497 | 0.466673 | 1.537601 | ENSG000001PPIF/FLC   | GO_BP |
| GO:000240 | 2  | 2/1117  | 12/20610  | 0.135219 | 0.467407 | 3.075201 | ENSG000001CLEC4A/CIG | GO_BP |
| GO:006048 | 2  | 2/1117  | 12/20610  | 0.135219 | 0.467407 | 3.075201 | ENSG000001OPRL1/NA   | GO_BP |
| GO:009000 | 2  | 2/1117  | 12/20610  | 0.135219 | 0.467407 | 3.075201 | ENSG000001ETS2/SRF   | GO_BP |
| GO:000698 | 8  | 8/1117  | 94/20610  | 0.137123 | 0.471314 | 1.570316 | ENSG000001CFD/NA/F   | GO_BP |
| GO:009950 | 3  | 3/1117  | 24/20610  | 0.138323 | 0.471314 | 2.306401 | ENSG000001STX4/VAMI  | GO_BP |
| GO:000188 | 4  | 4/1117  | 37/20610  | 0.138531 | 0.471314 | 1.994725 | ENSG000001RAB11B/SI  | GO_BP |
| GO:009750 | 4  | 4/1117  | 37/20610  | 0.138531 | 0.471314 | 1.994725 | ENSG000001SDF2/DPM   | GO_BP |
| GO:000150 | 27 | 27/1117 | 399/20610 | 0.139001 | 0.472604 | 1.248578 | ENSG000001KLF2/RGS   | GO_BP |
| GO:002153 | 20 | 20/1117 | 284/20610 | 0.139984 | 0.475635 | 1.299381 | ENSG000001KDM6B/RH   | GO_BP |
| GO:190382 | 24 | 24/1117 | 350/20610 | 0.141045 | 0.478007 | 1.265226 | ENSG000001UBL5/ABHI  | GO_BP |
| GO:004812 | 5  | 5/1117  | 51/20610  | 0.141143 | 0.478007 | 1.808942 | ENSG000001S100A6/CIG | GO_BP |
| GO:005170 | 8  | 8/1117  | 95/20610  | 0.143099 | 0.483053 | 1.553786 | ENSG000001CALM3/GP   | GO_BP |
| GO:190022 | 3  | 3/1117  | 25/20610  | 0.151219 | 0.501837 | 2.214145 | ENSG000001SRF/HMGC   | GO_BP |
| GO:004578 | 2  | 2/1117  | 13/20610  | 0.154316 | 0.501837 | 2.838647 | ENSG000001KCNE3/BI   | GO_BP |
| GO:000070 | 6  | 6/1117  | 67/20610  | 0.154471 | 0.501837 | 1.652347 | ENSG000001TYROBP/PI  | GO_BP |
| GO:004888 | 6  | 6/1117  | 67/20610  | 0.154471 | 0.501837 | 1.652347 | ENSG000001CALM3/CO   | GO_BP |
| GO:005190 | 23 | 23/1117 | 338/20610 | 0.155325 | 0.503687 | 1.255556 | ENSG000001VIM/DYNL   | GO_BP |
| GO:003247 | 8  | 8/1117  | 97/20610  | 0.155429 | 0.503687 | 1.521749 | ENSG000001MMP9/CAL   | GO_BP |
| GO:003090 | 10 | 10/1117 | 128/20610 | 0.156743 | 0.507312 | 1.441501 | ENSG000001CTDSP2/HI  | GO_BP |
| GO:004390 | 32 | 32/1117 | 490/20610 | 0.15875  | 0.510364 | 1.204977 | ENSG000001IFITM2/B   | GO_BP |
| GO:003262 | 4  | 4/1117  | 39/20610  | 0.158966 | 0.510364 | 1.892432 | ENSG000001MYD88/IL   | GO_BP |
| GO:000758 | 17 | 17/1117 | 241/20610 | 0.161644 | 0.518321 | 1.301538 | ENSG000001AQP3/CDK   | GO_BP |
| GO:004597 | 7  | 7/1117  | 83/20610  | 0.162888 | 0.519694 | 1.556126 | ENSG000001IRS2/WDR   | GO_BP |
| GO:000197 | 3  | 3/1117  | 26/20610  | 0.164478 | 0.519694 | 2.128986 | ENSG000001SNCA/CHMI  | GO_BP |
| GO:003022 | 3  | 3/1117  | 26/20610  | 0.164478 | 0.519694 | 2.128986 | ENSG000001SRF/NBEAI  | GO_BP |
| GO:190040 | 3  | 3/1117  | 26/20610  | 0.164478 | 0.519694 | 2.128986 | ENSG000001MCL1/TLR   | GO_BP |
| GO:200007 | 3  | 3/1117  | 26/20610  | 0.164478 | 0.519694 | 2.128986 | ENSG000001TYROBP/S   | GO_BP |
| GO:200017 | 3  | 3/1117  | 26/20610  | 0.164478 | 0.519694 | 2.128986 | ENSG000001KCTD11/N   | GO_BP |
| GO:001052 | 5  | 5/1117  | 54/20610  | 0.167315 | 0.527372 | 1.708445 | ENSG000001CALM3/SR   | GO_BP |
| GO:004852 | 11 | 11/1117 | 146/20610 | 0.169089 | 0.530947 | 1.39016  | ENSG000001IFITM2/B   | GO_BP |
| GO:000692 | 6  | 6/1117  | 69/20610  | 0.170101 | 0.531631 | 1.604453 | ENSG000001TYROBP/PI  | GO_BP |
| GO:004420 | 20 | 20/1117 | 293/20610 | 0.171881 | 0.532856 | 1.259468 | ENSG000001NAGK/IRS   | GO_BP |

|           |    |         |           |          |          |          |                  |            |       |
|-----------|----|---------|-----------|----------|----------|----------|------------------|------------|-------|
| GO:001027 | 2  | 2/1117  | 14/20610  | 0.173885 | 0.532856 | 2.635887 | ENSG000001000000 | MT2A/MT1   | GO_BP |
| GO:009067 | 2  | 2/1117  | 14/20610  | 0.173885 | 0.532856 | 2.635887 | ENSG000001000000 | SOD2/NA    | GO_BP |
| GO:009077 | 2  | 2/1117  | 14/20610  | 0.173885 | 0.532856 | 2.635887 | ENSG000001000000 | CD81/IL2   | GO_BP |
| GO:190172 | 2  | 2/1117  | 14/20610  | 0.173885 | 0.532856 | 2.635887 | ENSG000001000000 | FLCN/MYC   | GO_BP |
| GO:000097 | 13 | 13/1117 | 179/20610 | 0.174333 | 0.533283 | 1.340032 | ENSG000001000000 | CALM3/RH   | GO_BP |
| GO:190370 | 13 | 13/1117 | 179/20610 | 0.174333 | 0.533283 | 1.340032 | ENSG000001000000 | NFKBIA/Z   | GO_BP |
| GO:004852 | 9  | 9/1117  | 116/20610 | 0.177725 | 0.538932 | 1.431559 | ENSG000001000000 | POLR2C/I   | GO_BP |
| GO:000959 | 3  | 3/1117  | 27/20610  | 0.178064 | 0.538932 | 2.050134 | ENSG000001000000 | TLR2/TLR   | GO_BP |
| GO:006056 | 3  | 3/1117  | 27/20610  | 0.178064 | 0.538932 | 2.050134 | ENSG000001000000 | BCL2L1/I   | GO_BP |
| GO:007116 | 11 | 11/1117 | 148/20610 | 0.179904 | 0.543579 | 1.371374 | ENSG000001000000 | SRSF1/U2   | GO_BP |
| GO:004816 | 15 | 15/1117 | 213/20610 | 0.181532 | 0.546598 | 1.299381 | ENSG000001000000 | TYROBP/D   | GO_BP |
| GO:005080 | 7  | 7/1117  | 86/20610  | 0.18459  | 0.554842 | 1.501843 | ENSG000001000000 | DGKI/EIF   | GO_BP |
| GO:001077 | 3  | 3/1117  | 28/20610  | 0.191944 | 0.56331  | 1.976915 | ENSG000001000000 | VIM/ARRB   | GO_BP |
| GO:003220 | 3  | 3/1117  | 28/20610  | 0.191944 | 0.56331  | 1.976915 | ENSG000001000000 | POLE4/UPI  | GO_BP |
| GO:190288 | 3  | 3/1117  | 28/20610  | 0.191944 | 0.56331  | 1.976915 | ENSG000001000000 | MCL1/TLR   | GO_BP |
| GO:000246 | 2  | 2/1117  | 15/20610  | 0.193818 | 0.56331  | 2.460161 | ENSG000001000000 | BCL3/TNF   | GO_BP |
| GO:006029 | 2  | 2/1117  | 15/20610  | 0.193818 | 0.56331  | 2.460161 | ENSG000001000000 | TSP0/HES   | GO_BP |
| GO:190102 | 2  | 2/1117  | 15/20610  | 0.193818 | 0.56331  | 2.460161 | ENSG000001000000 | SLC25A5/   | GO_BP |
| GO:190354 | 2  | 2/1117  | 15/20610  | 0.193818 | 0.56331  | 2.460161 | ENSG000001000000 | SDCBP/CH   | GO_BP |
| GO:009890 | 5  | 5/1117  | 57/20610  | 0.195219 | 0.566177 | 1.618527 | ENSG000001000000 | KCNE3/BI   | GO_BP |
| GO:000836 | 12 | 12/1117 | 168/20610 | 0.201185 | 0.581786 | 1.317943 | ENSG000001000000 | CDC42SE1   | GO_BP |
| GO:001052 | 8  | 8/1117  | 104/20610 | 0.202256 | 0.583133 | 1.419324 | ENSG000001000000 | CALM3/SR   | GO_BP |
| GO:190589 | 4  | 4/1117  | 43/20610  | 0.202775 | 0.583133 | 1.716391 | ENSG000001000000 | PPP1R15A   | GO_BP |
| GO:000933 | 31 | 31/1117 | 488/20610 | 0.203339 | 0.584107 | 1.172105 | ENSG000001000000 | CARD16/CIG | GO_BP |
| GO:000677 | 3  | 3/1117  | 29/20610  | 0.206081 | 0.589698 | 1.908746 | ENSG000001000000 | PFKM/ALD   | GO_BP |
| GO:003633 | 3  | 3/1117  | 29/20610  | 0.206081 | 0.589698 | 1.908746 | ENSG000001000000 | CALR/CCR   | GO_BP |
| GO:004578 | 31 | 31/1117 | 489/20610 | 0.206542 | 0.590689 | 1.169709 | ENSG000001000000 | AIF1/NA/I  | GO_BP |
| GO:003538 | 9  | 9/1117  | 121/20610 | 0.209881 | 0.598258 | 1.372404 | ENSG000001000000 | PDHB/SNC   | GO_BP |
| GO:000756 | 12 | 12/1117 | 170/20610 | 0.212267 | 0.598519 | 1.302438 | ENSG000001000000 | B2M/NA/PI  | GO_BP |
| GO:000697 | 2  | 2/1117  | 16/20610  | 0.214018 | 0.598519 | 2.306401 | ENSG000001000000 | FCN1/MFGI  | GO_BP |
| GO:003099 | 2  | 2/1117  | 16/20610  | 0.214018 | 0.598519 | 2.306401 | ENSG000001000000 | RHOB/RHO   | GO_BP |
| GO:004007 | 2  | 2/1117  | 16/20610  | 0.214018 | 0.598519 | 2.306401 | ENSG000001000000 | HMGN1/HE   | GO_BP |
| GO:005144 | 2  | 2/1117  | 16/20610  | 0.214018 | 0.598519 | 2.306401 | ENSG000001000000 | DUSP1/PRIG | GO_BP |
| GO:009064 | 2  | 2/1117  | 16/20610  | 0.214018 | 0.598519 | 2.306401 | ENSG000001000000 | B2M/NA     | GO_BP |
| GO:009750 | 2  | 2/1117  | 16/20610  | 0.214018 | 0.598519 | 2.306401 | ENSG000001000000 | MT2A/MT1   | GO_BP |
| GO:190023 | 2  | 2/1117  | 16/20610  | 0.214018 | 0.598519 | 2.306401 | ENSG000001000000 | SOD2/NA    | GO_BP |
| GO:190354 | 2  | 2/1117  | 16/20610  | 0.214018 | 0.598519 | 2.306401 | ENSG000001000000 | SDCBP/CH   | GO_BP |
| GO:190218 | 5  | 5/1117  | 59/20610  | 0.214656 | 0.598705 | 1.563662 | ENSG000001000000 | CHMP2A/TI  | GO_BP |
| GO:004662 | 9  | 9/1117  | 122/20610 | 0.216578 | 0.601482 | 1.361155 | ENSG000001000000 | DUSP6/RG   | GO_BP |
| GO:000202 | 8  | 8/1117  | 106/20610 | 0.21658  | 0.601482 | 1.392544 | ENSG000001000000 | CALM3/SR   | GO_BP |
| GO:004583 | 11 | 11/1117 | 155/20610 | 0.220154 | 0.607658 | 1.309441 | ENSG000001000000 | IRS2/CTDI  | GO_BP |
| GO:190384 | 3  | 3/1117  | 30/20610  | 0.220445 | 0.607658 | 1.845121 | ENSG000001000000 | SDCBP/FL   | GO_BP |
| GO:006056 | 17 | 17/1117 | 255/20610 | 0.222344 | 0.612242 | 1.230081 | ENSG000001000000 | TWF2/DBN   | GO_BP |
| GO:190352 | 4  | 4/1117  | 45/20610  | 0.225885 | 0.617403 | 1.640107 | ENSG000001000000 | SRI/ZC3H   | GO_BP |
| GO:005080 | 14 | 14/1117 | 206/20610 | 0.2283   | 0.62025  | 1.253966 | ENSG000001000000 | TYROBP/AIG | GO_BP |
| GO:005120 | 10 | 10/1117 | 140/20610 | 0.228443 | 0.62025  | 1.317943 | ENSG000001000000 | CALM3/SR   | GO_BP |
| GO:000947 | 21 | 21/1117 | 325/20610 | 0.23254  | 0.62025  | 1.192232 | ENSG000001000000 | RGS2/MGS   | GO_BP |
| GO:000192 | 2  | 2/1117  | 17/20610  | 0.234399 | 0.62025  | 2.17073  | ENSG000001000000 | SNCA/HGN   | GO_BP |
| GO:003368 | 2  | 2/1117  | 17/20610  | 0.234399 | 0.62025  | 2.17073  | ENSG000001000000 | ATRAID/TI  | GO_BP |
| GO:003497 | 2  | 2/1117  | 17/20610  | 0.234399 | 0.62025  | 2.17073  | ENSG000001000000 | CALR/DNA   | GO_BP |
| GO:004547 | 2  | 2/1117  | 17/20610  | 0.234399 | 0.62025  | 2.17073  | ENSG000001000000 | OPRL1/NA   | GO_BP |
| GO:004650 | 2  | 2/1117  | 17/20610  | 0.234399 | 0.62025  | 2.17073  | ENSG000001000000 | AHCYL1/MIG | GO_BP |
| GO:200013 | 2  | 2/1117  | 17/20610  | 0.234399 | 0.62025  | 2.17073  | ENSG000001000000 | PIM1/HES   | GO_BP |
| GO:005068 | 7  | 7/1117  | 93/20610  | 0.239357 | 0.628388 | 1.388801 | ENSG000001000000 | DHX58/IF   | GO_BP |

|           |    |         |          |          |          |          |                  |              |       |
|-----------|----|---------|----------|----------|----------|----------|------------------|--------------|-------|
| GO:004858 | 17 | 17/1117 | 259/2061 | 0.241328 | 0.632922 | 1.211083 | ENSG000001211083 | TWF2/RGS2    | GO_BP |
| GO:003288 | 16 | 16/1117 | 243/2061 | 0.245877 | 0.643226 | 1.214894 | ENSG000001214894 | CHMP2A/MMP9  | GO_BP |
| GO:200014 | 24 | 24/1117 | 380/2061 | 0.247364 | 0.6457   | 1.165339 | ENSG000001165339 | BST2/AIF1    | GO_BP |
| GO:001991 | 6  | 6/1117  | 78/2061  | 0.247446 | 0.6457   | 1.419324 | ENSG000001419324 | NFKBIA/ZC3H7 | GO_BP |
| GO:190018 | 6  | 6/1117  | 78/2061  | 0.247446 | 0.6457   | 1.419324 | ENSG000001419324 | PRKCD/ZC3H7  | GO_BP |
| GO:003240 | 19 | 19/1117 | 295/2061 | 0.250684 | 0.650222 | 1.188383 | ENSG000001188383 | TMSB4X/MMP9  | GO_BP |
| GO:000679 | 25 | 25/1117 | 399/2061 | 0.254349 | 0.651127 | 1.156091 | ENSG000001156091 | MGST3/IRS1   | GO_BP |
| GO:003582 | 13 | 13/1117 | 194/2061 | 0.254373 | 0.651127 | 1.236421 | ENSG000001236421 | LYZ/CALM3    | GO_BP |
| GO:004001 | 28 | 28/1117 | 451/2061 | 0.25447  | 0.651127 | 1.14553  | ENSG00000114553  | BST2/AIF1    | GO_BP |
| GO:005178 | 2  | 2/1117  | 18/2061  | 0.254881 | 0.651127 | 2.050134 | ENSG000002050134 | TXNIP/MYD88  | GO_BP |
| GO:009018 | 2  | 2/1117  | 18/2061  | 0.254881 | 0.651127 | 2.050134 | ENSG000002050134 | MMP9/FLC1    | GO_BP |
| GO:003231 | 5  | 5/1117  | 63/2061  | 0.255176 | 0.651127 | 1.464382 | ENSG000001464382 | NFKBIA/PIGO  | GO_BP |
| GO:005212 | 5  | 5/1117  | 63/2061  | 0.255176 | 0.651127 | 1.464382 | ENSG000001464382 | CHMP2A/TIG1  | GO_BP |
| GO:000989 | 22 | 22/1117 | 349/2061 | 0.261824 | 0.664493 | 1.163113 | ENSG000001163113 | SDCBP/MCI1   | GO_BP |
| GO:006061 | 3  | 3/1117  | 33/2061  | 0.264567 | 0.667859 | 1.677383 | ENSG000001677383 | JUNB/HES1    | GO_BP |
| GO:000251 | 5  | 5/1117  | 64/2061  | 0.26559  | 0.669205 | 1.441501 | ENSG000001441501 | ADCY7/ZC3H7  | GO_BP |
| GO:001081 | 15 | 15/1117 | 230/2061 | 0.266505 | 0.67014  | 1.20334  | ENSG00000120334  | NINJ1/RAV1   | GO_BP |
| GO:003158 | 24 | 24/1117 | 385/2061 | 0.267817 | 0.673112 | 1.150205 | ENSG000001150205 | NINJ1/RAV1   | GO_BP |
| GO:004341 | 13 | 13/1117 | 197/2061 | 0.271821 | 0.680608 | 1.217592 | ENSG000001217592 | TMSB4X/P/    | GO_BP |
| GO:000698 | 4  | 4/1117  | 49/2061  | 0.273852 | 0.680608 | 1.506221 | ENSG000001506221 | PPP1R15A     | GO_BP |
| GO:000734 | 2  | 2/1117  | 19/2061  | 0.275394 | 0.680608 | 1.942232 | ENSG000001942232 | CD9/FOLR1    | GO_BP |
| GO:001608 | 2  | 2/1117  | 19/2061  | 0.275394 | 0.680608 | 1.942232 | ENSG000001942232 | SNCA/VAMIGO  | GO_BP |
| GO:190591 | 2  | 2/1117  | 19/2061  | 0.275394 | 0.680608 | 1.942232 | ENSG000001942232 | RETN/CIT1    | GO_BP |
| GO:200064 | 2  | 2/1117  | 19/2061  | 0.275394 | 0.680608 | 1.942232 | ENSG000001942232 | KCTD11/N/    | GO_BP |
| GO:003221 | 5  | 5/1117  | 65/2061  | 0.276096 | 0.681695 | 1.419324 | ENSG000001419324 | PFN1/GPR1    | GO_BP |
| GO:190186 | 5  | 5/1117  | 66/2061  | 0.286686 | 0.697871 | 1.397819 | ENSG000001397819 | RGS2/FLC1    | GO_BP |
| GO:190374 | 5  | 5/1117  | 66/2061  | 0.286686 | 0.697871 | 1.397819 | ENSG000001397819 | UBL5/RAC1    | GO_BP |
| GO:003241 | 8  | 8/1117  | 116/2061 | 0.293121 | 0.705335 | 1.272497 | ENSG000001272497 | TMSB4X/C/    | GO_BP |
| GO:000998 | 6  | 6/1117  | 83/2061  | 0.294122 | 0.705335 | 1.333822 | ENSG000001333822 | CD9/LGAL1    | GO_BP |
| GO:005131 | 3  | 3/1117  | 35/2061  | 0.294544 | 0.705335 | 1.581532 | ENSG000001581532 | SNCA/HP1     | GO_BP |
| GO:005121 | 14 | 14/1117 | 218/2061 | 0.294886 | 0.705335 | 1.18494  | ENSG00000118494  | SRSF1/U2     | GO_BP |
| GO:000110 | 23 | 23/1117 | 374/2061 | 0.295204 | 0.705335 | 1.1347   | ENSG0000011347   | KLF2/AQP1    | GO_BP |
| GO:004568 | 7  | 7/1117  | 100/2061 | 0.29855  | 0.708783 | 1.291585 | ENSG000001291585 | AQP3/MAF1    | GO_BP |
| GO:003134 | 21 | 21/1117 | 342/2061 | 0.308581 | 0.727985 | 1.132969 | ENSG000001132969 | ADCY7/DHAPK1 | GO_BP |
| GO:005128 | 9  | 9/1117  | 135/2061 | 0.310033 | 0.727985 | 1.230081 | ENSG000001230081 | CALM3/SR     | GO_BP |
| GO:009010 | 4  | 4/1117  | 52/2061  | 0.31085  | 0.727985 | 1.419324 | ENSG000001419324 | PSAP/DVL1    | GO_BP |
| GO:190591 | 6  | 6/1117  | 85/2061  | 0.313274 | 0.729136 | 1.302438 | ENSG000001302438 | NFKBIA/PIGO  | GO_BP |
| GO:190156 | 13 | 13/1117 | 204/2061 | 0.313945 | 0.729136 | 1.175812 | ENSG000001175812 | MGST3/AL     | GO_BP |
| GO:003071 | 2  | 2/1117  | 21/2061  | 0.316263 | 0.729136 | 1.757258 | ENSG000001757258 | RGS2/PTG     | GO_BP |
| GO:003281 | 2  | 2/1117  | 21/2061  | 0.316263 | 0.729136 | 1.757258 | ENSG000001757258 | RGS2/IRS1    | GO_BP |
| GO:003011 | 4  | 4/1117  | 53/2061  | 0.323296 | 0.740015 | 1.392544 | ENSG000001392544 | PRKCD/SEI1   | GO_BP |
| GO:003051 | 4  | 4/1117  | 53/2061  | 0.323296 | 0.740015 | 1.392544 | ENSG000001392544 | MMP9/MMP1    | GO_BP |
| GO:003260 | 10 | 10/1117 | 154/2061 | 0.324411 | 0.740015 | 1.19813  | ENSG00000119813  | FADD/ISG1    | GO_BP |
| GO:200101 | 7  | 7/1117  | 103/2061 | 0.324836 | 0.740015 | 1.253966 | ENSG000001253966 | RGS2/PSA1    | GO_BP |
| GO:005128 | 9  | 9/1117  | 137/2061 | 0.325208 | 0.740211 | 1.212123 | ENSG000001212123 | CALM3/SR     | GO_BP |
| GO:003221 | 7  | 7/1117  | 104/2061 | 0.333682 | 0.754355 | 1.241908 | ENSG000001241908 | PFN1/GPR1    | GO_BP |
| GO:190004 | 4  | 4/1117  | 54/2061  | 0.335775 | 0.754355 | 1.366756 | ENSG000001366756 | PRKCD/SEI1   | GO_BP |
| GO:004506 | 2  | 2/1117  | 22/2061  | 0.336514 | 0.754355 | 1.677383 | ENSG000001677383 | SRF/CD74     | GO_BP |
| GO:006131 | 2  | 2/1117  | 22/2061  | 0.336514 | 0.754355 | 1.677383 | ENSG000001677383 | RHOA/MSN     | GO_BP |
| GO:014011 | 2  | 2/1117  | 22/2061  | 0.336514 | 0.754355 | 1.677383 | ENSG000001677383 | SDCBP/CHI    | GO_BP |
| GO:003440 | 3  | 3/1117  | 38/2061  | 0.339808 | 0.759426 | 1.456674 | ENSG000001456674 | KLF2/PTG     | GO_BP |
| GO:190001 | 3  | 3/1117  | 38/2061  | 0.339808 | 0.759426 | 1.456674 | ENSG000001456674 | PRKCD/CI     | GO_BP |
| GO:190101 | 3  | 3/1117  | 38/2061  | 0.339808 | 0.759426 | 1.456674 | ENSG000001456674 | BBC3/BAK     | GO_BP |
| GO:004261 | 5  | 5/1117  | 71/2061  | 0.340533 | 0.759426 | 1.299381 | ENSG000001299381 | ARRB2/RE     | GO_BP |

|           |    |         |          |          |          |          |                  |            |       |
|-----------|----|---------|----------|----------|----------|----------|------------------|------------|-------|
| GO:005134 | 8  | 8/1117  | 122/2061 | 0.341836 | 0.761676 | 1.209915 | ENSG000001000000 | CALM3/GN   | GO_BP |
| GO:190211 | 14 | 14/1117 | 226/2061 | 0.342147 | 0.762042 | 1.142995 | ENSG000001000000 | SDCBP/CH   | GO_BP |
| GO:000170 | 9  | 9/1117  | 140/2061 | 0.348221 | 0.772365 | 1.186149 | ENSG000001000000 | MMP9/KDM   | GO_BP |
| GO:002203 | 8  | 8/1117  | 123/2061 | 0.350078 | 0.773583 | 1.200079 | ENSG000001000000 | AIF1/NA    | GO_BP |
| GO:003028 | 8  | 8/1117  | 123/2061 | 0.350078 | 0.773583 | 1.200079 | ENSG000001000000 | ATRAID/SIG | GO_BP |
| GO:004276 | 3  | 3/1117  | 39/2061  | 0.354878 | 0.773583 | 1.419324 | ENSG000001000000 | UBC/DDB1   | GO_BP |
| GO:005159 | 3  | 3/1117  | 39/2061  | 0.354878 | 0.773583 | 1.419324 | ENSG000001000000 | ARL6IP1/   | GO_BP |
| GO:007160 | 3  | 3/1117  | 39/2061  | 0.354878 | 0.773583 | 1.419324 | ENSG000001000000 | TYROBP/FI  | GO_BP |
| GO:000728 | 2  | 2/1117  | 23/2061  | 0.356579 | 0.773583 | 1.604453 | ENSG000001000000 | HMGB2/PY   | GO_BP |
| GO:009015 | 2  | 2/1117  | 23/2061  | 0.356579 | 0.773583 | 1.604453 | ENSG000001000000 | PRKCD/SMI  | GO_BP |
| GO:200103 | 2  | 2/1117  | 23/2061  | 0.356579 | 0.773583 | 1.604453 | ENSG000001000000 | PSAP/TXN   | GO_BP |
| GO:009703 | 4  | 4/1117  | 56/2061  | 0.360774 | 0.779563 | 1.317943 | ENSG000001000000 | PRKCD/SL   | GO_BP |
| GO:199008 | 4  | 4/1117  | 56/2061  | 0.360774 | 0.779563 | 1.317943 | ENSG000001000000 | EIF4A3/AI  | GO_BP |
| GO:000165 | 12 | 12/1117 | 194/2061 | 0.36099  | 0.779563 | 1.141312 | ENSG000001000000 | KDM6B/FL   | GO_BP |
| GO:004873 | 12 | 12/1117 | 194/2061 | 0.36099  | 0.779563 | 1.141312 | ENSG000001000000 | PBX2/NA    | GO_BP |
| GO:000716 | 20 | 20/1117 | 336/2061 | 0.365158 | 0.78758  | 1.098286 | ENSG000001000000 | DUSP1/ZNI  | GO_BP |
| GO:000189 | 15 | 15/1117 | 248/2061 | 0.368439 | 0.792746 | 1.116001 | ENSG000001000000 | LYZ/B2M    | GO_BP |
| GO:190274 | 3  | 3/1117  | 40/2061  | 0.369902 | 0.792746 | 1.383841 | ENSG000001000000 | BCL2L11/I  | GO_BP |
| GO:200011 | 6  | 6/1117  | 91/2061  | 0.371664 | 0.792746 | 1.216563 | ENSG000001000000 | RHOA/GNA   | GO_BP |
| GO:190007 | 5  | 5/1117  | 74/2061  | 0.373222 | 0.792746 | 1.246703 | ENSG000001000000 | PRKCD/GN   | GO_BP |
| GO:190377 | 5  | 5/1117  | 74/2061  | 0.373222 | 0.792746 | 1.246703 | ENSG000001000000 | CALM3/SR   | GO_BP |
| GO:005083 | 4  | 4/1117  | 57/2061  | 0.373269 | 0.792746 | 1.294822 | ENSG000001000000 | PRKCD/SEI  | GO_BP |
| GO:006111 | 4  | 4/1117  | 57/2061  | 0.373269 | 0.792746 | 1.294822 | ENSG000001000000 | PIM3/SRI   | GO_BP |
| GO:003510 | 10 | 10/1117 | 161/2061 | 0.375278 | 0.792746 | 1.146038 | ENSG000001000000 | PBX2/NA    | GO_BP |
| GO:190007 | 2  | 2/1117  | 24/2061  | 0.376421 | 0.792746 | 1.537601 | ENSG000001000000 | GNAI2/AD   | GO_BP |
| GO:004580 | 5  | 5/1117  | 75/2061  | 0.384127 | 0.804215 | 1.230081 | ENSG000001000000 | SDCBP/TLI  | GO_BP |
| GO:009712 | 4  | 4/1117  | 58/2061  | 0.385744 | 0.804215 | 1.272497 | ENSG000001000000 | TYROBP/DI  | GO_BP |
| GO:003004 | 9  | 9/1117  | 146/2061 | 0.394824 | 0.815318 | 1.137403 | ENSG000001000000 | VIM/SRI    | GO_BP |
| GO:000209 | 2  | 2/1117  | 25/2061  | 0.396003 | 0.815318 | 1.476097 | ENSG000001000000 | IRS2/MYC   | GO_BP |
| GO:001488 | 2  | 2/1117  | 25/2061  | 0.396003 | 0.815318 | 1.476097 | ENSG000001000000 | METRNL/N   | GO_BP |
| GO:000926 | 3  | 3/1117  | 42/2061  | 0.399735 | 0.817928 | 1.317943 | ENSG000001000000 | RAB11B/GI  | GO_BP |
| GO:004668 | 3  | 3/1117  | 42/2061  | 0.399735 | 0.817928 | 1.317943 | ENSG000001000000 | PPIF/ZC3I  | GO_BP |
| GO:002154 | 7  | 7/1117  | 113/2061 | 0.414202 | 0.826613 | 1.142995 | ENSG000001000000 | AIF1/NA    | GO_BP |
| GO:000709 | 12 | 12/1117 | 202/2061 | 0.414229 | 0.826613 | 1.096111 | ENSG000001000000 | CHMP2A/M   | GO_BP |
| GO:009033 | 3  | 3/1117  | 43/2061  | 0.414508 | 0.826613 | 1.287294 | ENSG000001000000 | TXN/BAG3   | GO_BP |
| GO:004814 | 2  | 2/1117  | 26/2061  | 0.415297 | 0.826613 | 1.419324 | ENSG000001000000 | FADD/SNC   | GO_BP |
| GO:004875 | 2  | 2/1117  | 26/2061  | 0.415297 | 0.826613 | 1.419324 | ENSG000001000000 | BLOC1S4/I  | GO_BP |
| GO:005158 | 2  | 2/1117  | 26/2061  | 0.415297 | 0.826613 | 1.419324 | ENSG000001000000 | RGS2/SNC   | GO_BP |
| GO:005187 | 2  | 2/1117  | 26/2061  | 0.415297 | 0.826613 | 1.419324 | ENSG000001000000 | RAB11B/BIG | GO_BP |
| GO:003090 | 10 | 10/1117 | 167/2061 | 0.419451 | 0.826613 | 1.104863 | ENSG000001000000 | AIF1/NA    | GO_BP |
| GO:000640 | 15 | 15/1117 | 257/2061 | 0.42167  | 0.826613 | 1.076919 | ENSG000001000000 | SRSF1/NOI  | GO_BP |
| GO:004306 | 27 | 27/1117 | 474/2061 | 0.422838 | 0.826613 | 1.051018 | ENSG000001000000 | SDCBP/MMI  | GO_BP |
| GO:000314 | 1  | 1/1117  | 10/2061  | 0.427267 | 0.826613 | 1.845121 | ENSG000001000000 | FZD2       | GO_BP |
| GO:003097 | 1  | 1/1117  | 10/2061  | 0.427267 | 0.826613 | 1.845121 | ENSG000001000000 | HES1       | GO_BP |
| GO:003262 | 1  | 1/1117  | 10/2061  | 0.427267 | 0.826613 | 1.845121 | ENSG000001000000 | TLR2       | GO_BP |
| GO:003369 | 1  | 1/1117  | 10/2061  | 0.427267 | 0.826613 | 1.845121 | ENSG000001000000 | GATA1      | GO_BP |
| GO:004480 | 1  | 1/1117  | 10/2061  | 0.427267 | 0.826613 | 1.845121 | ENSG000001000000 | HYAL2      | GO_BP |
| GO:004875 | 1  | 1/1117  | 10/2061  | 0.427267 | 0.826613 | 1.845121 | ENSG000001000000 | CD63       | GO_BP |
| GO:005140 | 1  | 1/1117  | 10/2061  | 0.427267 | 0.826613 | 1.845121 | ENSG000001000000 | DUSP6      | GO_BP |
| GO:005190 | 1  | 1/1117  | 10/2061  | 0.427267 | 0.826613 | 1.845121 | ENSG000001000000 | TSPO       | GO_BP |
| GO:006003 | 1  | 1/1117  | 10/2061  | 0.427267 | 0.826613 | 1.845121 | ENSG000001000000 | NINJ1      | GO_BP |
| GO:007209 | 1  | 1/1117  | 10/2061  | 0.427267 | 0.826613 | 1.845121 | ENSG000001000000 | HES1       | GO_BP |
| GO:007220 | 1  | 1/1117  | 10/2061  | 0.427267 | 0.826613 | 1.845121 | ENSG000001000000 | MYC        | GO_BP |
| GO:009071 | 1  | 1/1117  | 10/2061  | 0.427267 | 0.826613 | 1.845121 | ENSG000001000000 | IL23A      | GO_BP |



|          |    |         |           |          |          |          |                 |            |       |
|----------|----|---------|-----------|----------|----------|----------|-----------------|------------|-------|
| GO:19024 | 1  | 1/1117  | 10/20610  | 0.427267 | 0.826613 | 1.845121 | ENSG00000427267 | ZNF706     | GO_BP |
| GO:19037 | 1  | 1/1117  | 10/20610  | 0.427267 | 0.826613 | 1.845121 | ENSG00000427267 | BAG3       | GO_BP |
| GO:20002 | 1  | 1/1117  | 10/20610  | 0.427267 | 0.826613 | 1.845121 | ENSG00000427267 | CFAP20     | GO_BP |
| GO:20008 | 1  | 1/1117  | 10/20610  | 0.427267 | 0.826613 | 1.845121 | ENSG00000427267 | RETN       | GO_BP |
| GO:00031 | 5  | 5/1117  | 79/20610  | 0.427575 | 0.826613 | 1.167798 | ENSG00000427575 | PLXND1/D   | GO_BP |
| GO:00301 | 5  | 5/1117  | 79/20610  | 0.427575 | 0.826613 | 1.167798 | ENSG00000427575 | PRKCD/SEI  | GO_BP |
| GO:00422 | 5  | 5/1117  | 79/20610  | 0.427575 | 0.826613 | 1.167798 | ENSG00000427575 | GPX1/NIN   | GO_BP |
| GO:19030 | 6  | 6/1117  | 97/20610  | 0.430366 | 0.830151 | 1.141312 | ENSG00000430366 | PRKCD/SEI  | GO_BP |
| GO:00023 | 2  | 2/1117  | 27/20610  | 0.434276 | 0.832069 | 1.366756 | ENSG00000434276 | TXNIP/CD   | GO_BP |
| GO:00459 | 2  | 2/1117  | 27/20610  | 0.434276 | 0.832069 | 1.366756 | ENSG00000434276 | PRKACA/N   | GO_BP |
| GO:00996 | 2  | 2/1117  | 27/20610  | 0.434276 | 0.832069 | 1.366756 | ENSG00000434276 | STX3/HGN   | GO_BP |
| GO:00024 | 5  | 5/1117  | 80/20610  | 0.438355 | 0.835921 | 1.153201 | ENSG00000438355 | ARPC3/PRI  | GO_BP |
| GO:00083 | 5  | 5/1117  | 80/20610  | 0.438355 | 0.835921 | 1.153201 | ENSG00000438355 | CSTB/ARRI  | GO_BP |
| GO:19000 | 5  | 5/1117  | 80/20610  | 0.438355 | 0.835921 | 1.153201 | ENSG00000438355 | PRKCD/SEI  | GO_BP |
| GO:00613 | 9  | 9/1117  | 152/20610 | 0.441625 | 0.838828 | 1.092506 | ENSG00000441625 | CALM3/SR   | GO_BP |
| GO:00020 | 2  | 2/1117  | 28/20610  | 0.452917 | 0.838828 | 1.317943 | ENSG00000452917 | GAA/MYL4   | GO_BP |
| GO:00360 | 2  | 2/1117  | 28/20610  | 0.452917 | 0.838828 | 1.317943 | ENSG00000452917 | INPPL1/MIG | GO_BP |
| GO:00082 | 11 | 11/1117 | 190/20610 | 0.455277 | 0.838828 | 1.068228 | ENSG00000455277 | SOD2/NA    | GO_BP |
| GO:19059 | 10 | 10/1117 | 172/20610 | 0.456231 | 0.838828 | 1.072745 | ENSG00000456231 | HNRNPK/NIG | GO_BP |
| GO:00341 | 3  | 3/1117  | 46/20610  | 0.458053 | 0.838828 | 1.20334  | ENSG00000458053 | ADAM8/IL   | GO_BP |
| GO:00456 | 3  | 3/1117  | 46/20610  | 0.458053 | 0.838828 | 1.20334  | ENSG00000458053 | TRADD/KR   | GO_BP |
| GO:00215 | 1  | 1/1117  | 11/20610  | 0.458322 | 0.838828 | 1.677383 | ENSG00000458322 | ATF5       | GO_BP |
| GO:00510 | 1  | 1/1117  | 11/20610  | 0.458322 | 0.838828 | 1.677383 | ENSG00000458322 | GMFG       | GO_BP |
| GO:00702 | 1  | 1/1117  | 11/20610  | 0.458322 | 0.838828 | 1.677383 | ENSG00000458322 | RGCC       | GO_BP |
| GO:19012 | 1  | 1/1117  | 11/20610  | 0.458322 | 0.838828 | 1.677383 | ENSG00000458322 | RGCC       | GO_BP |
| GO:00486 | 4  | 4/1117  | 64/20610  | 0.459539 | 0.839101 | 1.153201 | ENSG00000459539 | RGS2/YBX   | GO_BP |
| GO:00350 | 5  | 5/1117  | 82/20610  | 0.459766 | 0.839101 | 1.125074 | ENSG00000459766 | POLR2C/ZIG | GO_BP |
| GO:00901 | 21 | 21/1117 | 373/20610 | 0.460692 | 0.840496 | 1.038808 | ENSG00000460692 | TMSB4X/A   | GO_BP |
| GO:00347 | 12 | 12/1117 | 210/20610 | 0.467614 | 0.84846  | 1.054355 | ENSG00000467614 | TMSB4X/IIG | GO_BP |
| GO:00351 | 2  | 2/1117  | 29/20610  | 0.471201 | 0.84846  | 1.272497 | ENSG00000471201 | NDUFA2/UIG | GO_BP |
| GO:20010 | 2  | 2/1117  | 29/20610  | 0.471201 | 0.84846  | 1.272497 | ENSG00000471201 | ARL6IP1/IG | GO_BP |
| GO:00075 | 4  | 4/1117  | 65/20610  | 0.471568 | 0.84846  | 1.135459 | ENSG00000471568 | PSAP/SLC   | GO_BP |
| GO:01061 | 9  | 9/1117  | 156/20610 | 0.472614 | 0.84846  | 1.064493 | ENSG00000472614 | KDM6B/FL   | GO_BP |
| GO:01201 | 9  | 9/1117  | 156/20610 | 0.472614 | 0.84846  | 1.064493 | ENSG00000472614 | KDM6B/FL   | GO_BP |
| GO:00611 | 12 | 12/1117 | 211/20610 | 0.474249 | 0.84846  | 1.049358 | ENSG00000474249 | PLXND1/SIG | GO_BP |
| GO:00435 | 7  | 7/1117  | 120/20610 | 0.476463 | 0.84846  | 1.076321 | ENSG00000476463 | RGS2/AIF   | GO_BP |
| GO:00351 | 9  | 9/1117  | 157/20610 | 0.480309 | 0.84846  | 1.057713 | ENSG00000480309 | PFN1/BCL   | GO_BP |
| GO:00508 | 5  | 5/1117  | 84/20610  | 0.480936 | 0.84846  | 1.098286 | ENSG00000480936 | PRKCD/SEI  | GO_BP |
| GO:00991 | 27 | 27/1117 | 488/20610 | 0.48434  | 0.84846  | 1.020866 | ENSG0000048434  | CALM3/TYIG | GO_BP |
| GO:01201 | 3  | 3/1117  | 48/20610  | 0.486303 | 0.84846  | 1.153201 | ENSG00000486303 | FLCN/TLR   | GO_BP |
| GO:00024 | 1  | 1/1117  | 12/20610  | 0.487695 | 0.84846  | 1.537601 | ENSG00000487695 | CD274      | GO_BP |
| GO:00069 | 1  | 1/1117  | 12/20610  | 0.487695 | 0.84846  | 1.537601 | ENSG00000487695 | SCAP       | GO_BP |
| GO:00434 | 1  | 1/1117  | 12/20610  | 0.487695 | 0.84846  | 1.537601 | ENSG00000487695 | CD63       | GO_BP |
| GO:00434 | 1  | 1/1117  | 12/20610  | 0.487695 | 0.84846  | 1.537601 | ENSG00000487695 | CD63       | GO_BP |
| GO:00446 | 1  | 1/1117  | 12/20610  | 0.487695 | 0.84846  | 1.537601 | ENSG00000487695 | CD81       | GO_BP |
| GO:00606 | 1  | 1/1117  | 12/20610  | 0.487695 | 0.84846  | 1.537601 | ENSG00000487695 | SOCS3      | GO_BP |
| GO:00607 | 1  | 1/1117  | 12/20610  | 0.487695 | 0.84846  | 1.537601 | ENSG00000487695 | PSAP       | GO_BP |
| GO:00607 | 1  | 1/1117  | 12/20610  | 0.487695 | 0.84846  | 1.537601 | ENSG00000487695 | PSAP       | GO_BP |
| GO:00614 | 1  | 1/1117  | 12/20610  | 0.487695 | 0.84846  | 1.537601 | ENSG00000487695 | CALR       | GO_BP |
| GO:00725 | 1  | 1/1117  | 12/20610  | 0.487695 | 0.84846  | 1.537601 | ENSG00000487695 | RGCC       | GO_BP |
| GO:00905 | 1  | 1/1117  | 12/20610  | 0.487695 | 0.84846  | 1.537601 | ENSG00000487695 | S1PR1      | GO_BP |
| GO:19011 | 1  | 1/1117  | 12/20610  | 0.487695 | 0.84846  | 1.537601 | ENSG00000487695 | CALR       | GO_BP |
| GO:19041 | 1  | 1/1117  | 12/20610  | 0.487695 | 0.84846  | 1.537601 | ENSG00000487695 | TSPO       | GO_BP |
| GO:00068 | 2  | 2/1117  | 30/20610  | 0.489112 | 0.84846  | 1.230081 | ENSG00000489112 | CLNS1A/E   | GO_BP |

|           |    |         |          |          |          |          |                  |            |       |
|-----------|----|---------|----------|----------|----------|----------|------------------|------------|-------|
| GO:001066 | 10 | 10/1117 | 177/2061 | 0.492658 | 0.851761 | 1.042441 | ENSG000001042441 | TMSB4X/AA  | GO_BP |
| GO:004594 | 3  | 3/1117  | 49/2061  | 0.500158 | 0.858576 | 1.129666 | ENSG000001129666 | DDIT4/MIIG | GO_BP |
| GO:003520 | 12 | 12/1117 | 215/2061 | 0.500632 | 0.858576 | 1.029835 | ENSG000001029835 | DUSP6/RG   | GO_BP |
| GO:001029 | 26 | 26/1117 | 474/2061 | 0.503842 | 0.858576 | 1.012092 | ENSG000001012092 | PSAP/RILIG | GO_BP |
| GO:005198 | 2  | 2/1117  | 31/2061  | 0.506637 | 0.858576 | 1.190401 | ENSG000001190401 | RCC2/NA    | GO_BP |
| GO:000329 | 3  | 3/1117  | 50/2061  | 0.513821 | 0.858576 | 1.107073 | ENSG000001107073 | IFI6/TSP   | GO_BP |
| GO:001071 | 3  | 3/1117  | 50/2061  | 0.513821 | 0.858576 | 1.107073 | ENSG000001107073 | VIM/ARRB   | GO_BP |
| GO:002151 | 3  | 3/1117  | 50/2061  | 0.513821 | 0.858576 | 1.107073 | ENSG000001107073 | ABT1/NFE   | GO_BP |
| GO:006032 | 3  | 3/1117  | 50/2061  | 0.513821 | 0.858576 | 1.107073 | ENSG000001107073 | SRF/RRAS   | GO_BP |
| GO:006138 | 3  | 3/1117  | 50/2061  | 0.513821 | 0.858576 | 1.107073 | ENSG000001107073 | RHOA/SRF   | GO_BP |
| GO:007010 | 3  | 3/1117  | 50/2061  | 0.513821 | 0.858576 | 1.107073 | ENSG000001107073 | ATRAID/I   | GO_BP |
| GO:000190 | 1  | 1/1117  | 13/2061  | 0.515477 | 0.858576 | 1.419324 | ENSG000001419324 | UBE2Q1     | GO_BP |
| GO:009752 | 1  | 1/1117  | 13/2061  | 0.515477 | 0.858576 | 1.419324 | ENSG000001419324 | FADD       | GO_BP |
| GO:009890 | 1  | 1/1117  | 13/2061  | 0.515477 | 0.858576 | 1.419324 | ENSG000001419324 | KCNE3      | GO_BP |
| GO:007060 | 6  | 6/1117  | 106/2061 | 0.516296 | 0.859664 | 1.044408 | ENSG000001044408 | TYROBP/MI  | GO_BP |
| GO:000600 | 22 | 22/1117 | 403/2061 | 0.51756  | 0.861492 | 1.007262 | ENSG000001007262 | CEBPA/DHIG | GO_BP |
| GO:003262 | 4  | 4/1117  | 69/2061  | 0.518597 | 0.862664 | 1.069635 | ENSG000001069635 | PNP/IRF4   | GO_BP |
| GO:200071 | 4  | 4/1117  | 69/2061  | 0.518597 | 0.862664 | 1.069635 | ENSG000001069635 | B2M/NA/HI  | GO_BP |
| GO:002171 | 2  | 2/1117  | 32/2061  | 0.523765 | 0.864038 | 1.153201 | ENSG000001153201 | SRF/ATF5   | GO_BP |
| GO:004824 | 2  | 2/1117  | 32/2061  | 0.523765 | 0.864038 | 1.153201 | ENSG000001153201 | PRKACA/N   | GO_BP |
| GO:005194 | 2  | 2/1117  | 32/2061  | 0.523765 | 0.864038 | 1.153201 | ENSG000001153201 | RGS2/SNC   | GO_BP |
| GO:006029 | 2  | 2/1117  | 32/2061  | 0.523765 | 0.864038 | 1.153201 | ENSG000001153201 | RETN/CFAIG | GO_BP |
| GO:009069 | 2  | 2/1117  | 32/2061  | 0.523765 | 0.864038 | 1.153201 | ENSG000001153201 | PSAP/ARRIG | GO_BP |
| GO:003090 | 23 | 23/1117 | 423/2061 | 0.52446  | 0.864038 | 1.003257 | ENSG000001003257 | B2M/NA/T   | GO_BP |
| GO:001071 | 3  | 3/1117  | 51/2061  | 0.527281 | 0.864038 | 1.085365 | ENSG000001085365 | SDCBP/ZNIG | GO_BP |
| GO:003164 | 4  | 4/1117  | 70/2061  | 0.530046 | 0.864038 | 1.054355 | ENSG000001054355 | OPRL1/NA   | GO_BP |
| GO:004662 | 4  | 4/1117  | 70/2061  | 0.530046 | 0.864038 | 1.054355 | ENSG000001054355 | PIM1/HLX   | GO_BP |
| GO:004863 | 20 | 20/1117 | 370/2061 | 0.537871 | 0.864038 | 0.997363 | ENSG000001097363 | DUSP6/TWIG | GO_BP |
| GO:001040 | 2  | 2/1117  | 33/2061  | 0.540487 | 0.864038 | 1.118255 | ENSG000001118255 | IRS2/MYC   | GO_BP |
| GO:003571 | 2  | 2/1117  | 33/2061  | 0.540487 | 0.864038 | 1.118255 | ENSG000001118255 | SRI/STX4   | GO_BP |
| GO:200103 | 2  | 2/1117  | 33/2061  | 0.540487 | 0.864038 | 1.118255 | ENSG000001118255 | PSAP/TXN   | GO_BP |
| GO:005144 | 3  | 3/1117  | 52/2061  | 0.540532 | 0.864038 | 1.064493 | ENSG000001064493 | DUSP1/CAIG | GO_BP |
| GO:001962 | 1  | 1/1117  | 14/2061  | 0.541753 | 0.864038 | 1.317943 | ENSG000001317943 | CEBPA      | GO_BP |
| GO:003581 | 1  | 1/1117  | 14/2061  | 0.541753 | 0.864038 | 1.317943 | ENSG000001317943 | GNAI2      | GO_BP |
| GO:004338 | 1  | 1/1117  | 14/2061  | 0.541753 | 0.864038 | 1.317943 | ENSG000001317943 | CD74       | GO_BP |
| GO:005171 | 1  | 1/1117  | 14/2061  | 0.541753 | 0.864038 | 1.317943 | ENSG000001317943 | BCL2L11    | GO_BP |
| GO:006102 | 1  | 1/1117  | 14/2061  | 0.541753 | 0.864038 | 1.317943 | ENSG000001317943 | SRF        | GO_BP |
| GO:007139 | 1  | 1/1117  | 14/2061  | 0.541753 | 0.864038 | 1.317943 | ENSG000001317943 | WBP2       | GO_BP |
| GO:012010 | 6  | 6/1117  | 109/2061 | 0.543858 | 0.865798 | 1.015663 | ENSG000001015663 | KDM6B/FH   | GO_BP |
| GO:190188 | 6  | 6/1117  | 109/2061 | 0.543858 | 0.865798 | 1.015663 | ENSG000001015663 | S100A10/IG | GO_BP |
| GO:007020 | 7  | 7/1117  | 128/2061 | 0.545255 | 0.867755 | 1.00905  | ENSG00000100905  | FURIN/CS   | GO_BP |
| GO:000189 | 5  | 5/1117  | 91/2061  | 0.552466 | 0.875141 | 1.013803 | ENSG000001013803 | JUNB/CEBIG | GO_BP |
| GO:005129 | 4  | 4/1117  | 72/2061  | 0.552534 | 0.875141 | 1.025067 | ENSG000001025067 | CHMP2A/CIG | GO_BP |
| GO:007209 | 4  | 4/1117  | 72/2061  | 0.552534 | 0.875141 | 1.025067 | ENSG000001025067 | PIM1/HMGIG | GO_BP |
| GO:009034 | 4  | 4/1117  | 72/2061  | 0.552534 | 0.875141 | 1.025067 | ENSG000001025067 | B2M/NA/HI  | GO_BP |
| GO:000293 | 3  | 3/1117  | 53/2061  | 0.553566 | 0.875141 | 1.044408 | ENSG000001044408 | PANX2/PP   | GO_BP |
| GO:000860 | 2  | 2/1117  | 34/2061  | 0.556798 | 0.875141 | 1.085365 | ENSG000001085365 | RCC2/NA    | GO_BP |
| GO:001098 | 2  | 2/1117  | 34/2061  | 0.556798 | 0.875141 | 1.085365 | ENSG000001085365 | HNRNPK/LIG | GO_BP |
| GO:006032 | 2  | 2/1117  | 34/2061  | 0.556798 | 0.875141 | 1.085365 | ENSG000001085365 | RRAS/CSR   | GO_BP |
| GO:003208 | 6  | 6/1117  | 111/2061 | 0.561842 | 0.875141 | 0.997363 | ENSG000001097363 | TMSB4X/NIG | GO_BP |
| GO:000170 | 12 | 12/1117 | 225/2061 | 0.564918 | 0.875141 | 0.984064 | ENSG000001084064 | PLXND1/SIG | GO_BP |
| GO:003290 | 3  | 3/1117  | 54/2061  | 0.566378 | 0.875141 | 1.025067 | ENSG000001025067 | VIM/ARRB   | GO_BP |
| GO:004510 | 3  | 3/1117  | 54/2061  | 0.566378 | 0.875141 | 1.025067 | ENSG000001025067 | VIM/TOR1   | GO_BP |
| GO:000941 | 1  | 1/1117  | 15/2061  | 0.566605 | 0.875141 | 1.230081 | ENSG000001230081 | CD9        | GO_BP |

|          |    |         |           |          |          |          |                    |       |
|----------|----|---------|-----------|----------|----------|----------|--------------------|-------|
| GO:00098 | 1  | 1/1117  | 15/20610  | 0.566605 | 0.875141 | 1.230081 | ENSG0000(SULT1A1   | GO_BP |
| GO:00181 | 1  | 1/1117  | 15/20610  | 0.566605 | 0.875141 | 1.230081 | ENSG0000(GPX1      | GO_BP |
| GO:00480 | 1  | 1/1117  | 15/20610  | 0.566605 | 0.875141 | 1.230081 | ENSG0000(BCL2L11   | GO_BP |
| GO:00602 | 1  | 1/1117  | 15/20610  | 0.566605 | 0.875141 | 1.230081 | ENSG0000(RAC2      | GO_BP |
| GO:00616 | 1  | 1/1117  | 15/20610  | 0.566605 | 0.875141 | 1.230081 | ENSG0000(HSPA8     | GO_BP |
| GO:00719 | 1  | 1/1117  | 15/20610  | 0.566605 | 0.875141 | 1.230081 | ENSG0000(CEBPA     | GO_BP |
| GO:00900 | 1  | 1/1117  | 15/20610  | 0.566605 | 0.875141 | 1.230081 | ENSG0000(TRMT112   | GO_BP |
| GO:19047 | 1  | 1/1117  | 15/20610  | 0.566605 | 0.875141 | 1.230081 | ENSG0000(VDR       | GO_BP |
| GO:20002 | 1  | 1/1117  | 15/20610  | 0.566605 | 0.875141 | 1.230081 | ENSG0000(RETN      | GO_BP |
| GO:00310 | 11 | 11/1117 | 207/20610 | 0.570645 | 0.878523 | 0.980499 | ENSG0000(GPX1/NIN  | GO_BP |
| GO:00451 | 12 | 12/1117 | 226/20610 | 0.571176 | 0.878523 | 0.97971  | ENSG0000(ARRB2/HM  | GO_BP |
| GO:00030 | 20 | 20/1117 | 377/20610 | 0.572285 | 0.878523 | 0.978844 | ENSG0000(PBX2/NA   | GO_BP |
| GO:00427 | 2  | 2/1117  | 35/20610  | 0.572692 | 0.878523 | 1.054355 | ENSG0000(OPRL1/NA  | GO_BP |
| GO:00701 | 2  | 2/1117  | 35/20610  | 0.572692 | 0.878523 | 1.054355 | ENSG0000(SRGN/GAT  | GO_BP |
| GO:19013 | 2  | 2/1117  | 35/20610  | 0.572692 | 0.878523 | 1.054355 | ENSG0000(KCNE3/BI  | GO_BP |
| GO:19021 | 2  | 2/1117  | 35/20610  | 0.572692 | 0.878523 | 1.054355 | ENSG0000(TRIM25/TI | GO_BP |
| GO:00076 | 7  | 7/1117  | 132/20610 | 0.578201 | 0.885402 | 0.978473 | ENSG0000(RGS14/SRI | GO_BP |
| GO:00108 | 3  | 3/1117  | 55/20610  | 0.578961 | 0.885519 | 1.00643  | ENSG0000(NFKBIA/Z  | GO_BP |
| GO:00420 | 8  | 8/1117  | 152/20610 | 0.585018 | 0.885594 | 0.971116 | ENSG0000(TYROBP/M  | GO_BP |
| GO:20002 | 4  | 4/1117  | 75/20610  | 0.585159 | 0.885594 | 0.984064 | ENSG0000(SERPING1  | GO_BP |
| GO:00102 | 2  | 2/1117  | 36/20610  | 0.588167 | 0.885594 | 1.025067 | ENSG0000(SERP1/HY  | GO_BP |
| GO:00328 | 2  | 2/1117  | 36/20610  | 0.588167 | 0.885594 | 1.025067 | ENSG0000(ARL6IP1   | GO_BP |
| GO:00519 | 2  | 2/1117  | 36/20610  | 0.588167 | 0.885594 | 1.025067 | ENSG0000(ARL6IP1   | GO_BP |
| GO:00439 | 11 | 11/1117 | 210/20610 | 0.590006 | 0.885594 | 0.966492 | ENSG0000(DHX58/POI | GO_BP |
| GO:00219 | 1  | 1/1117  | 16/20610  | 0.590111 | 0.885594 | 1.153201 | ENSG0000(HES1      | GO_BP |
| GO:00456 | 1  | 1/1117  | 16/20610  | 0.590111 | 0.885594 | 1.153201 | ENSG0000(VDR       | GO_BP |
| GO:19002 | 1  | 1/1117  | 16/20610  | 0.590111 | 0.885594 | 1.153201 | ENSG0000(DHX58     | GO_BP |
| GO:19048 | 1  | 1/1117  | 16/20610  | 0.590111 | 0.885594 | 1.153201 | ENSG0000(NOP10     | GO_BP |
| GO:19054 | 7  | 7/1117  | 134/20610 | 0.594237 | 0.889468 | 0.963869 | ENSG0000(STX4/ITG  | GO_BP |
| GO:00427 | 6  | 6/1117  | 115/20610 | 0.596758 | 0.891697 | 0.962672 | ENSG0000(SIAH2/DDI | GO_BP |
| GO:00105 | 2  | 2/1117  | 37/20610  | 0.603222 | 0.896234 | 0.997363 | ENSG0000(CCR2/PTG  | GO_BP |
| GO:00509 | 2  | 2/1117  | 37/20610  | 0.603222 | 0.896234 | 0.997363 | ENSG0000(CD63/HPS  | GO_BP |
| GO:00312 | 3  | 3/1117  | 57/20610  | 0.603424 | 0.896234 | 0.971116 | ENSG0000(CD81/TNF  | GO_BP |
| GO:00226 | 6  | 6/1117  | 116/20610 | 0.605252 | 0.898466 | 0.954373 | ENSG0000(ACO1/OPRI | GO_BP |
| GO:00302 | 5  | 5/1117  | 97/20610  | 0.609714 | 0.899433 | 0.951093 | ENSG0000(SRGN/ID3  | GO_BP |
| GO:00303 | 10 | 10/1117 | 194/20610 | 0.610353 | 0.899433 | 0.951093 | ENSG0000(SDCBP/SI  | GO_BP |
| GO:19018 | 9  | 9/1117  | 175/20610 | 0.612165 | 0.899433 | 0.948919 | ENSG0000(RGS2/PIM  | GO_BP |
| GO:00189 | 1  | 1/1117  | 17/20610  | 0.612343 | 0.899433 | 1.085365 | ENSG0000(TXN       | GO_BP |
| GO:00316 | 1  | 1/1117  | 17/20610  | 0.612343 | 0.899433 | 1.085365 | ENSG0000(S100B     | GO_BP |
| GO:00517 | 1  | 1/1117  | 17/20610  | 0.612343 | 0.899433 | 1.085365 | ENSG0000(BCL2L11   | GO_BP |
| GO:00518 | 1  | 1/1117  | 17/20610  | 0.612343 | 0.899433 | 1.085365 | ENSG0000(BCL2L11   | GO_BP |
| GO:20002 | 3  | 3/1117  | 58/20610  | 0.615298 | 0.901402 | 0.954373 | ENSG0000(DUSP1/CAI | GO_BP |
| GO:00468 | 7  | 7/1117  | 137/20610 | 0.617695 | 0.901402 | 0.942762 | ENSG0000(IRS2/SRI  | GO_BP |
| GO:00395 | 2  | 2/1117  | 38/20610  | 0.617856 | 0.901402 | 0.971116 | ENSG0000(DHX58/DD  | GO_BP |
| GO:20010 | 5  | 5/1117  | 98/20610  | 0.618834 | 0.902321 | 0.941388 | ENSG0000(PRKCD/WA  | GO_BP |
| GO:00466 | 6  | 6/1117  | 118/20610 | 0.621942 | 0.906344 | 0.938197 | ENSG0000(ARRB2/RE  | GO_BP |
| GO:00486 | 23 | 23/1117 | 445/20610 | 0.623764 | 0.907942 | 0.953658 | ENSG0000(PSAP/JUNI | GO_BP |
| GO:00068 | 7  | 7/1117  | 138/20610 | 0.625348 | 0.907942 | 0.935931 | ENSG0000(MGST3/SUI | GO_BP |
| GO:00717 | 8  | 8/1117  | 158/20610 | 0.628885 | 0.907942 | 0.934238 | ENSG0000(POLR2C/ZI | GO_BP |
| GO:00422 | 10 | 10/1117 | 197/20610 | 0.62971  | 0.907942 | 0.93661  | ENSG0000(ARRB2/HL  | GO_BP |
| GO:00018 | 6  | 6/1117  | 119/20610 | 0.630135 | 0.907942 | 0.930313 | ENSG0000(JUNB/SRF  | GO_BP |
| GO:00070 | 2  | 2/1117  | 39/20610  | 0.632071 | 0.907942 | 0.946216 | ENSG0000(CHMP2A/K  | GO_BP |
| GO:00326 | 2  | 2/1117  | 39/20610  | 0.632071 | 0.907942 | 0.946216 | ENSG0000(IRF4/CEBI | GO_BP |
| GO:00075 | 1  | 1/1117  | 18/20610  | 0.63337  | 0.907942 | 1.025067 | ENSG0000(SERPING1  | GO_BP |

|           |    |         |           |          |          |          |                      |       |
|-----------|----|---------|-----------|----------|----------|----------|----------------------|-------|
| GO:003164 | 1  | 1/1117  | 18/20610  | 0.63337  | 0.907942 | 1.025067 | ENSG000001PTGS2      | GO_BP |
| GO:190011 | 1  | 1/1117  | 18/20610  | 0.63337  | 0.907942 | 1.025067 | ENSG000001ZC3H12A    | GO_BP |
| GO:004239 | 24 | 24/1117 | 467/20610 | 0.636278 | 0.91092  | 0.948242 | ENSG000001DGKI/IFI   | GO_BP |
| GO:005079 | 4  | 4/1117  | 80/20610  | 0.636327 | 0.91092  | 0.92256  | ENSG000001RETN/OPR   | GO_BP |
| GO:000657 | 11 | 11/1117 | 218/20610 | 0.6396   | 0.913589 | 0.931024 | ENSG000001GPX1/CRT   | GO_BP |
| GO:190401 | 12 | 12/1117 | 238/20610 | 0.643106 | 0.917428 | 0.930313 | ENSG000001RHOB/ZC3   | GO_BP |
| GO:004512 | 4  | 4/1117  | 81/20610  | 0.646053 | 0.917428 | 0.911171 | ENSG000001ADAM8/FA   | GO_BP |
| GO:004516 | 15 | 15/1117 | 297/20610 | 0.648188 | 0.917428 | 0.931879 | ENSG000001MCL1/KDM   | GO_BP |
| GO:004864 | 3  | 3/1117  | 61/20610  | 0.649456 | 0.917428 | 0.907436 | ENSG000001PIM1/HES   | GO_BP |
| GO:000737 | 1  | 1/1117  | 19/20610  | 0.653258 | 0.917428 | 0.971116 | ENSG000001DVL2       | GO_BP |
| GO:000963 | 1  | 1/1117  | 19/20610  | 0.653258 | 0.917428 | 0.971116 | ENSG000001ZC3H12A    | GO_BP |
| GO:007257 | 1  | 1/1117  | 19/20610  | 0.653258 | 0.917428 | 0.971116 | ENSG000001CEBPB      | GO_BP |
| GO:190027 | 1  | 1/1117  | 19/20610  | 0.653258 | 0.917428 | 0.971116 | ENSG000001TYROBP     | GO_BP |
| GO:006032 | 2  | 2/1117  | 41/20610  | 0.659254 | 0.920868 | 0.900059 | ENSG000001RRAS/CSR   | GO_BP |
| GO:003503 | 3  | 3/1117  | 62/20610  | 0.660349 | 0.921397 | 0.8928   | ENSG000001CD9/FOLR   | GO_BP |
| GO:004863 | 10 | 10/1117 | 202/20610 | 0.660814 | 0.921549 | 0.913426 | ENSG000001TWF2/PIM   | GO_BP |
| GO:000264 | 1  | 1/1117  | 20/20610  | 0.672068 | 0.923314 | 0.92256  | ENSG000001CD274      | GO_BP |
| GO:001098 | 1  | 1/1117  | 20/20610  | 0.672068 | 0.923314 | 0.92256  | ENSG000001LRPAP1     | GO_BP |
| GO:003163 | 1  | 1/1117  | 20/20610  | 0.672068 | 0.923314 | 0.92256  | ENSG000001PTGS2      | GO_BP |
| GO:003606 | 1  | 1/1117  | 20/20610  | 0.672068 | 0.923314 | 0.92256  | ENSG000001POFUT2     | GO_BP |
| GO:004263 | 1  | 1/1117  | 20/20610  | 0.672068 | 0.923314 | 0.92256  | ENSG000001TRADD      | GO_BP |
| GO:190487 | 1  | 1/1117  | 20/20610  | 0.672068 | 0.923314 | 0.92256  | ENSG000001NOP10      | GO_BP |
| GO:190012 | 2  | 2/1117  | 42/20610  | 0.67223  | 0.923314 | 0.878629 | ENSG000001ZC3H12A/IG | GO_BP |
| GO:014003 | 9  | 9/1117  | 185/20610 | 0.677515 | 0.928851 | 0.897626 | ENSG000001TUBA1A/S   | GO_BP |
| GO:004513 | 2  | 2/1117  | 43/20610  | 0.684802 | 0.931245 | 0.858196 | ENSG000001ADAM8/S1   | GO_BP |
| GO:006096 | 2  | 2/1117  | 43/20610  | 0.684802 | 0.931245 | 0.858196 | ENSG000001ZC3H12A/IG | GO_BP |
| GO:000243 | 1  | 1/1117  | 21/20610  | 0.689858 | 0.931245 | 0.878629 | ENSG000001CD274      | GO_BP |
| GO:003583 | 1  | 1/1117  | 21/20610  | 0.689858 | 0.931245 | 0.878629 | ENSG000001GNAI2      | GO_BP |
| GO:006071 | 1  | 1/1117  | 21/20610  | 0.689858 | 0.931245 | 0.878629 | ENSG000001SOCS3      | GO_BP |
| GO:190211 | 4  | 4/1117  | 86/20610  | 0.692062 | 0.932521 | 0.858196 | ENSG000001SDCBP/RH   | GO_BP |
| GO:001063 | 15 | 15/1117 | 307/20610 | 0.697306 | 0.936666 | 0.901525 | ENSG000001TMSB4X/A   | GO_BP |
| GO:007153 | 13 | 13/1117 | 268/20610 | 0.699059 | 0.938778 | 0.895021 | ENSG000001SDCBP/ZN   | GO_BP |
| GO:004434 | 1  | 1/1117  | 22/20610  | 0.706684 | 0.941942 | 0.838691 | ENSG000001SERPINB1   | GO_BP |
| GO:004852 | 1  | 1/1117  | 22/20610  | 0.706684 | 0.941942 | 0.838691 | ENSG000001RETN       | GO_BP |
| GO:190013 | 1  | 1/1117  | 22/20610  | 0.706684 | 0.941942 | 0.838691 | ENSG000001RNF34      | GO_BP |
| GO:004846 | 9  | 9/1117  | 190/20610 | 0.707562 | 0.942041 | 0.874005 | ENSG000001KLF2/CEB   | GO_BP |
| GO:001404 | 2  | 2/1117  | 45/20610  | 0.708756 | 0.942041 | 0.820054 | ENSG000001SNCA/NTS   | GO_BP |
| GO:003164 | 2  | 2/1117  | 45/20610  | 0.708756 | 0.942041 | 0.820054 | ENSG000001TG/S100B   | GO_BP |
| GO:004476 | 4  | 4/1117  | 89/20610  | 0.717544 | 0.944221 | 0.829268 | ENSG000001BST2/DYN   | GO_BP |
| GO:004688 | 14 | 14/1117 | 292/20610 | 0.719388 | 0.944221 | 0.884647 | ENSG000001SLC25A5/   | GO_BP |
| GO:002266 | 2  | 2/1117  | 46/20610  | 0.720152 | 0.944221 | 0.802226 | ENSG000001ARRB2/RE   | GO_BP |
| GO:003101 | 2  | 2/1117  | 46/20610  | 0.720152 | 0.944221 | 0.802226 | ENSG000001BAK1/HES   | GO_BP |
| GO:003238 | 3  | 3/1117  | 68/20610  | 0.720539 | 0.944221 | 0.814024 | ENSG000001TXN/BAG3   | GO_BP |
| GO:000753 | 1  | 1/1117  | 23/20610  | 0.722598 | 0.944221 | 0.802226 | ENSG000001CITED2     | GO_BP |
| GO:002154 | 1  | 1/1117  | 23/20610  | 0.722598 | 0.944221 | 0.802226 | ENSG000001BTG2       | GO_BP |
| GO:004240 | 1  | 1/1117  | 23/20610  | 0.722598 | 0.944221 | 0.802226 | ENSG000001TG         | GO_BP |
| GO:004393 | 1  | 1/1117  | 23/20610  | 0.722598 | 0.944221 | 0.802226 | ENSG000001RHOA       | GO_BP |
| GO:007142 | 1  | 1/1117  | 23/20610  | 0.722598 | 0.944221 | 0.802226 | ENSG000001PIM1       | GO_BP |
| GO:200077 | 1  | 1/1117  | 23/20610  | 0.722598 | 0.944221 | 0.802226 | ENSG000001BCL2L12    | GO_BP |
| GO:000197 | 2  | 2/1117  | 47/20610  | 0.731169 | 0.947883 | 0.785158 | ENSG000001CCR2/BAK   | GO_BP |
| GO:007084 | 2  | 2/1117  | 47/20610  | 0.731169 | 0.947883 | 0.785158 | ENSG000001EEF1A1/Z   | GO_BP |
| GO:009034 | 5  | 5/1117  | 112/20610 | 0.732478 | 0.947883 | 0.823715 | ENSG000001B2M/NA/H   | GO_BP |
| GO:000761 | 1  | 1/1117  | 24/20610  | 0.737649 | 0.947883 | 0.7688   | ENSG000001UBE2Q1     | GO_BP |
| GO:001088 | 1  | 1/1117  | 24/20610  | 0.737649 | 0.947883 | 0.7688   | ENSG000001ZC3H12A    | GO_BP |

|           |    |         |           |          |          |          |            |            |       |
|-----------|----|---------|-----------|----------|----------|----------|------------|------------|-------|
| GO:004357 | 1  | 1/1117  | 24/20610  | 0.737649 | 0.947883 | 0.7688   | ENSG000001 | NTSR1      | GO_BP |
| GO:000182 | 2  | 2/1117  | 48/20610  | 0.741815 | 0.949238 | 0.7688   | ENSG000001 | JUNB/SRF   | GO_BP |
| GO:004857 | 2  | 2/1117  | 48/20610  | 0.741815 | 0.949238 | 0.7688   | ENSG000001 | OPRL1/NA   | GO_BP |
| GO:006029 | 2  | 2/1117  | 48/20610  | 0.741815 | 0.949238 | 0.7688   | ENSG000001 | TSPO/HES   | GO_BP |
| GO:006124 | 2  | 2/1117  | 48/20610  | 0.741815 | 0.949238 | 0.7688   | ENSG000001 | RHOA/MSN   | GO_BP |
| GO:000754 | 13 | 13/1117 | 277/20610 | 0.742062 | 0.94932  | 0.865941 | ENSG000001 | ARRB2/HM   | GO_BP |
| GO:004347 | 16 | 16/1117 | 337/20610 | 0.742525 | 0.949677 | 0.876022 | ENSG000001 | TRMT112/\  | GO_BP |
| GO:004592 | 14 | 14/1117 | 298/20610 | 0.746349 | 0.951594 | 0.866835 | ENSG000001 | SDCBP/S1   | GO_BP |
| GO:000940 | 1  | 1/1117  | 25/20610  | 0.751884 | 0.951594 | 0.738048 | ENSG000001 | MPST       | GO_BP |
| GO:001052 | 1  | 1/1117  | 25/20610  | 0.751884 | 0.951594 | 0.738048 | ENSG000001 | MOV10      | GO_BP |
| GO:001053 | 1  | 1/1117  | 25/20610  | 0.751884 | 0.951594 | 0.738048 | ENSG000001 | MOV10      | GO_BP |
| GO:003100 | 1  | 1/1117  | 25/20610  | 0.751884 | 0.951594 | 0.738048 | ENSG000001 | WNT10A     | GO_BP |
| GO:004568 | 1  | 1/1117  | 25/20610  | 0.751884 | 0.951594 | 0.738048 | ENSG000001 | HES1       | GO_BP |
| GO:190207 | 1  | 1/1117  | 25/20610  | 0.751884 | 0.951594 | 0.738048 | ENSG000001 | ZC3H12A    | GO_BP |
| GO:000803 | 2  | 2/1117  | 49/20610  | 0.752099 | 0.951594 | 0.753111 | ENSG000001 | BSG/TNN    | GO_BP |
| GO:003433 | 15 | 15/1117 | 320/20610 | 0.754721 | 0.954446 | 0.8649   | ENSG000001 | ZNF703/FIG | GO_BP |
| GO:004478 | 3  | 3/1117  | 72/20610  | 0.755834 | 0.954689 | 0.7688   | ENSG000001 | POLE4/UPI  | GO_BP |
| GO:190437 | 3  | 3/1117  | 72/20610  | 0.755834 | 0.954689 | 0.7688   | ENSG000001 | STX4/LGA   | GO_BP |
| GO:002300 | 24 | 24/1117 | 500/20610 | 0.759877 | 0.955073 | 0.885658 | ENSG000001 | SLC25A5/\  | GO_BP |
| GO:004688 | 3  | 3/1117  | 73/20610  | 0.764074 | 0.955073 | 0.758269 | ENSG000001 | PIM3/HMG   | GO_BP |
| GO:001088 | 1  | 1/1117  | 26/20610  | 0.765347 | 0.955073 | 0.709662 | ENSG000001 | NFKBIA     | GO_BP |
| GO:006034 | 1  | 1/1117  | 26/20610  | 0.765347 | 0.955073 | 0.709662 | ENSG000001 | SRF        | GO_BP |
| GO:006070 | 1  | 1/1117  | 26/20610  | 0.765347 | 0.955073 | 0.709662 | ENSG000001 | SOCS3      | GO_BP |
| GO:009715 | 1  | 1/1117  | 26/20610  | 0.765347 | 0.955073 | 0.709662 | ENSG000001 | HES1       | GO_BP |
| GO:000830 | 6  | 6/1117  | 139/20610 | 0.770732 | 0.958867 | 0.796455 | ENSG000001 | PSAP/TLR   | GO_BP |
| GO:004684 | 4  | 4/1117  | 96/20610  | 0.770863 | 0.958867 | 0.7688   | ENSG000001 | ADAM8/TP   | GO_BP |
| GO:004409 | 2  | 2/1117  | 51/20610  | 0.771608 | 0.958867 | 0.723577 | ENSG000001 | PSAP/S10   | GO_BP |
| GO:001092 | 5  | 5/1117  | 118/20610 | 0.772912 | 0.959202 | 0.781831 | ENSG000001 | TLR2/SRF   | GO_BP |
| GO:000831 | 1  | 1/1117  | 27/20610  | 0.778081 | 0.960035 | 0.683378 | ENSG000001 | RGS14      | GO_BP |
| GO:003019 | 1  | 1/1117  | 27/20610  | 0.778081 | 0.960035 | 0.683378 | ENSG000001 | TLR4       | GO_BP |
| GO:003164 | 1  | 1/1117  | 27/20610  | 0.778081 | 0.960035 | 0.683378 | ENSG000001 | EIF4A3     | GO_BP |
| GO:005130 | 1  | 1/1117  | 27/20610  | 0.778081 | 0.960035 | 0.683378 | ENSG000001 | MUS81      | GO_BP |
| GO:006060 | 1  | 1/1117  | 27/20610  | 0.778081 | 0.960035 | 0.683378 | ENSG000001 | SOCS3      | GO_BP |
| GO:007237 | 1  | 1/1117  | 27/20610  | 0.778081 | 0.960035 | 0.683378 | ENSG000001 | SERPING1   | GO_BP |
| GO:190004 | 1  | 1/1117  | 27/20610  | 0.778081 | 0.960035 | 0.683378 | ENSG000001 | TLR4       | GO_BP |
| GO:190352 | 3  | 3/1117  | 75/20610  | 0.779875 | 0.960035 | 0.738048 | ENSG000001 | RGS2/RHO   | GO_BP |
| GO:190520 | 2  | 2/1117  | 52/20610  | 0.780852 | 0.960035 | 0.709662 | ENSG000001 | ARRB2/KA   | GO_BP |
| GO:003102 | 6  | 6/1117  | 141/20610 | 0.782291 | 0.961408 | 0.785158 | ENSG000001 | CHMP2A/C   | GO_BP |
| GO:006002 | 4  | 4/1117  | 98/20610  | 0.784558 | 0.963045 | 0.753111 | ENSG000001 | PYG02/MM   | GO_BP |
| GO:004660 | 7  | 7/1117  | 163/20610 | 0.786335 | 0.963045 | 0.792383 | ENSG000001 | HMG2/BC    | GO_BP |
| GO:200017 | 2  | 2/1117  | 53/20610  | 0.789765 | 0.963045 | 0.696272 | ENSG000001 | GNAI2/NA   | GO_BP |
| GO:000264 | 1  | 1/1117  | 28/20610  | 0.790124 | 0.963045 | 0.658972 | ENSG000001 | CD274      | GO_BP |
| GO:000673 | 1  | 1/1117  | 28/20610  | 0.790124 | 0.963045 | 0.658972 | ENSG000001 | AHCYL1     | GO_BP |
| GO:005082 | 1  | 1/1117  | 28/20610  | 0.790124 | 0.963045 | 0.658972 | ENSG000001 | TLR4       | GO_BP |
| GO:006057 | 1  | 1/1117  | 28/20610  | 0.790124 | 0.963045 | 0.658972 | ENSG000001 | CRIP1      | GO_BP |
| GO:006047 | 3  | 3/1117  | 77/20610  | 0.794794 | 0.96698  | 0.718878 | ENSG000001 | HES1/CIT   | GO_BP |
| GO:004883 | 9  | 9/1117  | 207/20610 | 0.795681 | 0.96698  | 0.802226 | ENSG000001 | PSAP/CEB   | GO_BP |
| GO:000170 | 2  | 2/1117  | 54/20610  | 0.798356 | 0.96698  | 0.683378 | ENSG000001 | MCL1/HES   | GO_BP |
| GO:001017 | 2  | 2/1117  | 54/20610  | 0.798356 | 0.96698  | 0.683378 | ENSG000001 | RRAS/CSR   | GO_BP |
| GO:190357 | 2  | 2/1117  | 54/20610  | 0.798356 | 0.96698  | 0.683378 | ENSG000001 | PPP1R15A,  | GO_BP |
| GO:004852 | 1  | 1/1117  | 29/20610  | 0.801514 | 0.96698  | 0.636249 | ENSG000001 | CFAP20     | GO_BP |
| GO:006007 | 1  | 1/1117  | 29/20610  | 0.801514 | 0.96698  | 0.636249 | ENSG000001 | PFN1       | GO_BP |
| GO:190520 | 1  | 1/1117  | 29/20610  | 0.801514 | 0.96698  | 0.636249 | ENSG000001 | RGS2       | GO_BP |
| GO:003438 | 3  | 3/1117  | 78/20610  | 0.801931 | 0.96698  | 0.709662 | ENSG000001 | HNRNPK/A   | GO_BP |

GO:006041 5 5/1117 123/2061(0.802896 0.967918 0.750049 ENSG0000(DUSP6/RG GO\_BP  
 GO:000738 22 22/1117 474/2061(0.803097 0.967936 0.856385 ENSG0000(PBX2/NA/IGO\_BP  
 GO:003410 4 4/1117 101/2061(0.803869 0.968415 0.730741 ENSG0000(ADAM8/IL GO\_BP  
 GO:006049 8 8/1117 188/2061(0.805083 0.968431 0.785158 ENSG0000(TWF2/PFN GO\_BP  
 GO:000854 2 2/1117 55/20610 0.806636 0.968431 0.670953 ENSG0000(RGS14/HM GO\_BP  
 GO:000301 1 1/1117 30/20610 0.812287 0.968431 0.61504 ENSG0000(GAA GO\_BP  
 GO:000283 2 2/1117 56/20610 0.814611 0.970309 0.658972 ENSG0000(DHX58/CD GO\_BP  
 GO:004863 4 4/1117 104/2061( 0.82175 0.971863 0.709662 ENSG0000(PIM1/ARRI GO\_BP  
 GO:000329 1 1/1117 31/20610 0.822475 0.971863 0.5952 ENSG0000(TCAP GO\_BP  
 GO:000648 1 1/1117 31/20610 0.822475 0.971863 0.5952 ENSG0000(KDM6B GO\_BP  
 GO:003590 1 1/1117 31/20610 0.822475 0.971863 0.5952 ENSG0000(FOXO4 GO\_BP  
 GO:005068 1 1/1117 31/20610 0.822475 0.971863 0.5952 ENSG0000(DHX58 GO\_BP  
 GO:009034 1 1/1117 31/20610 0.822475 0.971863 0.5952 ENSG0000(BCL2L12 GO\_BP  
 GO:190547 1 1/1117 31/20610 0.822475 0.971863 0.5952 ENSG0000(GDI1 GO\_BP  
 GO:190186 4 4/1117 105/2061(0.827403 0.975027 0.702903 ENSG0000(PIM1/ARRI GO\_BP  
 GO:011011 3 3/1117 82/20610 0.828424 0.975027 0.675044 ENSG0000(PIM1/VDR GO\_BP  
 GO:190382 5 5/1117 128/2061(0.829659 0.975027 0.72075 ENSG0000(ABHD17A/IGO\_BP  
 GO:001909 1 1/1117 32/20610 0.832111 0.975027 0.5766 ENSG0000(UBE2Q1 GO\_BP  
 GO:004458 1 1/1117 32/20610 0.832111 0.975027 0.5766 ENSG0000(MPST GO\_BP  
 GO:006029 1 1/1117 32/20610 0.832111 0.975027 0.5766 ENSG0000(TSPO GO\_BP  
 GO:003526 6 6/1117 152/2061(0.838073 0.978204 0.728337 ENSG0000(KLF2/STA GO\_BP  
 GO:001071 1 1/1117 33/20610 0.841224 0.978204 0.559128 ENSG0000(ADIPOR1 GO\_BP  
 GO:012003 4 4/1117 108/2061(0.843475 0.978204 0.683378 ENSG0000(TWF2/PFN GO\_BP  
 GO:004398 2 2/1117 60/20610 0.843641 0.978204 0.61504 ENSG0000(CTTN/NA GO\_BP  
 GO:005088 2 2/1117 60/20610 0.843641 0.978204 0.61504 ENSG0000(GAA/TCAP GO\_BP  
 GO:000956 8 8/1117 198/2061(0.847164 0.978204 0.745503 ENSG0000(CD9/YBX3 GO\_BP  
 GO:000709 5 5/1117 132/2061(0.848876 0.978204 0.698909 ENSG0000(CHMP2A/CIGO\_BP  
 GO:003157 1 1/1117 34/20610 0.849843 0.978204 0.542683 ENSG0000(DUSP1 GO\_BP  
 GO:004826 1 1/1117 34/20610 0.849843 0.978204 0.542683 ENSG0000(TSPO GO\_BP  
 GO:005089 1 1/1117 34/20610 0.849843 0.978204 0.542683 ENSG0000(LGALS3 GO\_BP  
 GO:007169 7 7/1117 177/2061(0.850481 0.978204 0.729709 ENSG0000(KLF2/RHO GO\_BP  
 GO:003479 6 6/1117 156/2061(0.855261 0.978694 0.709662 ENSG0000(DHRS9/SUI GO\_BP  
 GO:005166 6 6/1117 156/2061(0.855261 0.978694 0.709662 ENSG0000(TYROBP/I GO\_BP  
 GO:006076 3 3/1117 87/20610 0.857215 0.978694 0.636249 ENSG0000(CARD16/IIGO\_BP  
 GO:000714 1 1/1117 35/20610 0.857995 0.978694 0.527177 ENSG0000(PRKAR1A GO\_BP  
 GO:004263 1 1/1117 35/20610 0.857995 0.978694 0.527177 ENSG0000(TRADD GO\_BP  
 GO:006014 1 1/1117 35/20610 0.857995 0.978694 0.527177 ENSG0000(TYROBP GO\_BP  
 GO:007009 1 1/1117 35/20610 0.857995 0.978694 0.527177 ENSG0000(CHMP2B GO\_BP  
 GO:000715 2 2/1117 63/20610 0.862637 0.982163 0.585753 ENSG0000(MUS81/KLIGO\_BP  
 GO:000740 2 2/1117 63/20610 0.862637 0.982163 0.585753 ENSG0000(KCTD11/N GO\_BP  
 GO:001087 19 19/1117 436/2061(0.865456 0.982635 0.804066 ENSG0000(HNRNPK/P GO\_BP  
 GO:001648 1 1/1117 36/20610 0.865704 0.982635 0.512534 ENSG0000(FURIN GO\_BP  
 GO:000256 2 2/1117 64/20610 0.868483 0.983636 0.5766 ENSG0000(TCF3/HMGI GO\_BP  
 GO:005130 7 7/1117 182/2061(0.869243 0.984017 0.709662 ENSG0000(TXNIP/CAI GO\_BP  
 GO:000979 3 3/1117 90/20610 0.872383 0.984017 0.61504 ENSG0000(ETS2/SRF GO\_BP  
 GO:002176 3 3/1117 90/20610 0.872383 0.984017 0.61504 ENSG0000(KDM6B/SRIGO\_BP  
 GO:190383 1 1/1117 37/20610 0.872995 0.984017 0.498681 ENSG0000(GNAI2 GO\_BP  
 GO:005088 3 3/1117 91/20610 0.877113 0.985365 0.608282 ENSG0000(HCAR2/RH GO\_BP  
 GO:000958 5 5/1117 139/2061(0.878168 0.985365 0.663713 ENSG0000(ARRB2/UN GO\_BP  
 GO:006004 1 1/1117 38/20610 0.879891 0.985365 0.485558 ENSG0000(PIM1 GO\_BP  
 GO:000327 4 4/1117 116/2061(0.880272 0.985365 0.636249 ENSG0000(PLXND1/HIGO\_BP  
 GO:005501 4 4/1117 116/2061(0.880272 0.985365 0.636249 ENSG0000(RGS2/PIM GO\_BP  
 GO:005067 17 17/1117 401/2061(0.881045 0.986018 0.782221 ENSG0000(B2M/NA/ZI GO\_BP  
 GO:000733 6 6/1117 163/2061(0.881717 0.986556 0.679186 ENSG0000(CD9/FOLR GO\_BP

|           |    |         |           |          |          |          |                    |       |
|-----------|----|---------|-----------|----------|----------|----------|--------------------|-------|
| GO:00015: | 1  | 1/1117  | 39/20610  | 0.886412 | 0.987336 | 0.473108 | ENSG0000(CFAP20    | GO_BP |
| GO:00069: | 1  | 1/1117  | 39/20610  | 0.886412 | 0.987336 | 0.473108 | ENSG0000(HMGB2     | GO_BP |
| GO:00486: | 4  | 4/1117  | 118/20610 | 0.888207 | 0.98838  | 0.625465 | ENSG0000(RGS2/SEM  | GO_BP |
| GO:00095: | 5  | 5/1117  | 142/20610 | 0.889159 | 0.98838  | 0.64969  | ENSG0000(ARRB2/UN  | GO_BP |
| GO:00400: | 2  | 2/1117  | 68/20610  | 0.88965  | 0.98838  | 0.542683 | ENSG0000(STAT5A/S  | GO_BP |
| GO:00450: | 2  | 2/1117  | 68/20610  | 0.88965  | 0.98838  | 0.542683 | ENSG0000(MAX/FOXO  | GO_BP |
| GO:19048: | 2  | 2/1117  | 68/20610  | 0.88965  | 0.98838  | 0.542683 | ENSG0000(EIF4A3/AI | GO_BP |
| GO:00147: | 1  | 1/1117  | 40/20610  | 0.89258  | 0.98838  | 0.46128  | ENSG0000(RGS2      | GO_BP |
| GO:20000: | 1  | 1/1117  | 40/20610  | 0.89258  | 0.98838  | 0.46128  | ENSG0000(ZNF706    | GO_BP |
| GO:00300: | 5  | 5/1117  | 143/20610 | 0.892628 | 0.98838  | 0.645147 | ENSG0000(DYNLT1/RI | GO_BP |
| GO:00485: | 6  | 6/1117  | 167/20610 | 0.894918 | 0.98838  | 0.662918 | ENSG0000(HMGB2/PY  | GO_BP |
| GO:00104: | 7  | 7/1117  | 191/20610 | 0.898112 | 0.98838  | 0.676222 | ENSG0000(PRKCD/LY  | GO_BP |
| GO:00431: | 1  | 1/1117  | 41/20610  | 0.898413 | 0.98838  | 0.450029 | ENSG0000(CXCR2     | GO_BP |
| GO:00901: | 1  | 1/1117  | 41/20610  | 0.898413 | 0.98838  | 0.450029 | ENSG0000(MYC       | GO_BP |
| GO:19001: | 1  | 1/1117  | 41/20610  | 0.898413 | 0.98838  | 0.450029 | ENSG0000(FLCN      | GO_BP |
| GO:19018: | 1  | 1/1117  | 41/20610  | 0.898413 | 0.98838  | 0.450029 | ENSG0000(S100A10   | GO_BP |
| GO:19013: | 3  | 3/1117  | 96/20610  | 0.898497 | 0.98838  | 0.5766   | ENSG0000(CD63/KCNI | GO_BP |
| GO:00336: | 2  | 2/1117  | 70/20610  | 0.899005 | 0.98838  | 0.527177 | ENSG0000(ITGB2/TE  | GO_BP |
| GO:00990: | 2  | 2/1117  | 70/20610  | 0.899005 | 0.98838  | 0.527177 | ENSG0000(STX3/HGN  | GO_BP |
| GO:19059: | 2  | 2/1117  | 70/20610  | 0.899005 | 0.98838  | 0.527177 | ENSG0000(NFKBIA/I  | GO_BP |
| GO:00603: | 2  | 2/1117  | 71/20610  | 0.903401 | 0.989051 | 0.519752 | ENSG0000(VIM/FAM8  | GO_BP |
| GO:00171: | 1  | 1/1117  | 42/20610  | 0.90393  | 0.989051 | 0.439314 | ENSG0000(ZFP36L2   | GO_BP |
| GO:00400: | 1  | 1/1117  | 42/20610  | 0.90393  | 0.989051 | 0.439314 | ENSG0000(HES1      | GO_BP |
| GO:00466: | 1  | 1/1117  | 42/20610  | 0.90393  | 0.989051 | 0.439314 | ENSG0000(RGS2      | GO_BP |
| GO:00108: | 4  | 4/1117  | 123/20610 | 0.906063 | 0.990499 | 0.600039 | ENSG0000(NINJ1/S1  | GO_BP |
| GO:20002: | 2  | 2/1117  | 72/20610  | 0.907617 | 0.990921 | 0.512534 | ENSG0000(RETN/CITI | GO_BP |
| GO:00025: | 1  | 1/1117  | 43/20610  | 0.909147 | 0.990921 | 0.429098 | ENSG0000(CD274     | GO_BP |
| GO:00106: | 4  | 4/1117  | 124/20610 | 0.909315 | 0.990921 | 0.5952   | ENSG0000(RHOA/ADI  | GO_BP |
| GO:00017: | 2  | 2/1117  | 73/20610  | 0.91166  | 0.992433 | 0.505513 | ENSG0000(KAT2A/TC  | GO_BP |
| GO:00022: | 2  | 2/1117  | 73/20610  | 0.91166  | 0.992433 | 0.505513 | ENSG0000(TCF3/HMG  | GO_BP |
| GO:00458: | 3  | 3/1117  | 100/20610 | 0.913126 | 0.992776 | 0.553536 | ENSG0000(HCAR2/SC  | GO_BP |
| GO:00069: | 1  | 1/1117  | 44/20610  | 0.914082 | 0.992776 | 0.419346 | ENSG0000(STX3      | GO_BP |
| GO:00067: | 5  | 5/1117  | 150/20610 | 0.914385 | 0.992898 | 0.61504  | ENSG0000(SLC2A1/RI | GO_BP |
| GO:00192: | 2  | 2/1117  | 74/20610  | 0.915537 | 0.993069 | 0.498681 | ENSG0000(S1PR1/SO  | GO_BP |
| GO:00073: | 1  | 1/1117  | 45/20610  | 0.918748 | 0.993069 | 0.410027 | ENSG0000(ALDOA     | GO_BP |
| GO:00323: | 1  | 1/1117  | 45/20610  | 0.918748 | 0.993069 | 0.410027 | ENSG0000(VDR       | GO_BP |
| GO:00343: | 1  | 1/1117  | 45/20610  | 0.918748 | 0.993069 | 0.410027 | ENSG0000(HNRNPK    | GO_BP |
| GO:00436: | 1  | 1/1117  | 45/20610  | 0.918748 | 0.993069 | 0.410027 | ENSG0000(VDR       | GO_BP |
| GO:00974: | 11 | 11/1117 | 290/20610 | 0.919835 | 0.993069 | 0.699873 | ENSG0000(IRS2/EPHI | GO_BP |
| GO:19013: | 7  | 7/1117  | 200/20610 | 0.921387 | 0.993069 | 0.645792 | ENSG0000(KLF2/RHO  | GO_BP |
| GO:20002: | 5  | 5/1117  | 153/20610 | 0.922456 | 0.993069 | 0.602981 | ENSG0000(DUSP1/RE  | GO_BP |
| GO:00215: | 1  | 1/1117  | 46/20610  | 0.923161 | 0.993069 | 0.401113 | ENSG0000(HES1      | GO_BP |
| GO:00519: | 1  | 1/1117  | 46/20610  | 0.923161 | 0.993069 | 0.401113 | ENSG0000(DUSP1     | GO_BP |
| GO:00988: | 1  | 1/1117  | 46/20610  | 0.923161 | 0.993069 | 0.401113 | ENSG0000(CARM1     | GO_BP |
| GO:00032: | 4  | 4/1117  | 130/20610 | 0.926805 | 0.993642 | 0.567729 | ENSG0000(SRF/HES1  | GO_BP |
| GO:00076: | 1  | 1/1117  | 47/20610  | 0.927335 | 0.993642 | 0.392579 | ENSG0000(UBE2Q1    | GO_BP |
| GO:00971: | 8  | 8/1117  | 226/20610 | 0.927531 | 0.993646 | 0.65314  | ENSG0000(SAT1/PRK  | GO_BP |
| GO:00198: | 6  | 6/1117  | 180/20610 | 0.929467 | 0.993753 | 0.61504  | ENSG0000(ZNF706/P  | GO_BP |
| GO:00323: | 1  | 1/1117  | 48/20610  | 0.931282 | 0.993753 | 0.3844   | ENSG0000(IRS2      | GO_BP |
| GO:00336: | 1  | 1/1117  | 48/20610  | 0.931282 | 0.993753 | 0.3844   | ENSG0000(TESC      | GO_BP |
| GO:00519: | 3  | 3/1117  | 106/20610 | 0.931497 | 0.993753 | 0.522204 | ENSG0000(DUSP1/RC  | GO_BP |
| GO:00506: | 6  | 6/1117  | 181/20610 | 0.931655 | 0.993753 | 0.611642 | ENSG0000(B2M/NA/T  | GO_BP |
| GO:00991: | 6  | 6/1117  | 181/20610 | 0.931655 | 0.993753 | 0.611642 | ENSG0000(ABHD17A/  | GO_BP |
| GO:00991: | 1  | 1/1117  | 50/20610  | 0.938546 | 0.995147 | 0.369024 | ENSG0000(SNCA      | GO_BP |

|           |    |         |           |          |          |          |                      |       |
|-----------|----|---------|-----------|----------|----------|----------|----------------------|-------|
| GO:005168 | 1  | 1/1117  | 51/20610  | 0.941884 | 0.995188 | 0.361788 | ENSG000004DYNLT1     | GO_BP |
| GO:006090 | 5  | 5/1117  | 162/20610 | 0.942768 | 0.995337 | 0.569482 | ENSG000004POLR2C/Z   | GO_BP |
| GO:005067 | 7  | 7/1117  | 211/20610 | 0.94345  | 0.995337 | 0.612125 | ENSG000004ZNF703/S   | GO_BP |
| GO:000208 | 2  | 2/1117  | 83/20610  | 0.943898 | 0.995337 | 0.444607 | ENSG000004VIM/PYGO   | GO_BP |
| GO:000608 | 2  | 2/1117  | 83/20610  | 0.943898 | 0.995337 | 0.444607 | ENSG000004TALD01/TI  | GO_BP |
| GO:001488 | 2  | 2/1117  | 83/20610  | 0.943898 | 0.995337 | 0.444607 | ENSG000004PIM1/PRK   | GO_BP |
| GO:007202 | 2  | 2/1117  | 84/20610  | 0.94642  | 0.995342 | 0.439314 | ENSG000004HES1/MYC   | GO_BP |
| GO:004242 | 3  | 3/1117  | 113/20610 | 0.948378 | 0.995827 | 0.489855 | ENSG000004TSPO/VDR   | GO_BP |
| GO:000999 | 1  | 1/1117  | 55/20610  | 0.953523 | 0.995974 | 0.335477 | ENSG000004ZGLP1      | GO_BP |
| GO:001488 | 1  | 1/1117  | 57/20610  | 0.958437 | 0.998893 | 0.323705 | ENSG000004TCAP       | GO_BP |
| GO:000268 | 1  | 1/1117  | 58/20610  | 0.960696 | 0.999923 | 0.318124 | ENSG000004DUSP1      | GO_BP |
| GO:006002 | 1  | 1/1117  | 58/20610  | 0.960696 | 0.999923 | 0.318124 | ENSG000004PIM1       | GO_BP |
| GO:005178 | 2  | 2/1117  | 91/20610  | 0.961274 | 0.999923 | 0.405521 | ENSG000004RHOA/VEG   | GO_BP |
| GO:000632 | 3  | 3/1117  | 120/20610 | 0.961317 | 0.999923 | 0.46128  | ENSG000004HMGA1/CHI  | GO_BP |
| GO:000320 | 5  | 5/1117  | 175/20610 | 0.963691 | 0.999923 | 0.527177 | ENSG000004PLXND1/SI  | GO_BP |
| GO:000192 | 2  | 2/1117  | 93/20610  | 0.964734 | 0.999923 | 0.3968   | ENSG000004TRADD/WN   | GO_BP |
| GO:005130 | 2  | 2/1117  | 93/20610  | 0.964734 | 0.999923 | 0.3968   | ENSG000004DUSP1/MU   | GO_BP |
| GO:004262 | 3  | 3/1117  | 123/20610 | 0.965871 | 0.999923 | 0.450029 | ENSG000004TRADD/PT   | GO_BP |
| GO:001642 | 1  | 1/1117  | 62/20610  | 0.968569 | 0.999923 | 0.2976   | ENSG000004TCF3       | GO_BP |
| GO:002240 | 2  | 2/1117  | 96/20610  | 0.969372 | 0.999923 | 0.3844   | ENSG000004TRADD/WN   | GO_BP |
| GO:002240 | 2  | 2/1117  | 96/20610  | 0.969372 | 0.999923 | 0.3844   | ENSG000004TRADD/WN   | GO_BP |
| GO:000760 | 1  | 1/1117  | 63/20610  | 0.970278 | 0.999923 | 0.292876 | ENSG000004UNC119     | GO_BP |
| GO:003282 | 1  | 1/1117  | 63/20610  | 0.970278 | 0.999923 | 0.292876 | ENSG000004HES1       | GO_BP |
| GO:002241 | 13 | 13/1117 | 377/20610 | 0.972387 | 0.999923 | 0.636249 | ENSG000004ARRB2/HM   | GO_BP |
| GO:001632 | 8  | 8/1117  | 259/20610 | 0.972944 | 0.999923 | 0.569922 | ENSG000004DYNLT1/RIG | GO_BP |
| GO:005080 | 8  | 8/1117  | 261/20610 | 0.974594 | 0.999923 | 0.565554 | ENSG000004ABHD17A/   | GO_BP |
| GO:009028 | 10 | 10/1117 | 310/20610 | 0.974966 | 0.999923 | 0.5952   | ENSG000004SDCBP/ZNI  | GO_BP |
| GO:000979 | 3  | 3/1117  | 134/20610 | 0.978599 | 0.999923 | 0.413087 | ENSG000004SRF/BBS5   | GO_BP |
| GO:003442 | 2  | 2/1117  | 105/20610 | 0.98002  | 0.999923 | 0.351452 | ENSG000004IRS2/ADI   | GO_BP |
| GO:006099 | 2  | 2/1117  | 106/20610 | 0.980954 | 0.999923 | 0.348136 | ENSG000004ARF1/DBN   | GO_BP |
| GO:005042 | 1  | 1/1117  | 71/20610  | 0.980996 | 0.999923 | 0.259876 | ENSG000004SNCA       | GO_BP |
| GO:000702 | 9  | 9/1117  | 296/20610 | 0.98165  | 0.999923 | 0.561016 | ENSG000004BLOC1S4/   | GO_BP |
| GO:000728 | 8  | 8/1117  | 278/20610 | 0.985315 | 0.999923 | 0.53097  | ENSG000004HMGB2/RP   | GO_BP |
| GO:009882 | 8  | 8/1117  | 278/20610 | 0.985315 | 0.999923 | 0.53097  | ENSG000004DUSP1/CH   | GO_BP |
| GO:190302 | 1  | 1/1117  | 77/20610  | 0.986413 | 0.999923 | 0.239626 | ENSG000004TLR4       | GO_BP |
| GO:009028 | 4  | 4/1117  | 175/20610 | 0.9871   | 0.999923 | 0.421742 | ENSG000004VWC2L/UB   | GO_BP |
| GO:004428 | 16 | 16/1117 | 476/20610 | 0.987286 | 0.999923 | 0.620209 | ENSG000004NAGK/IRS   | GO_BP |
| GO:005190 | 2  | 2/1117  | 115/20610 | 0.987653 | 0.999923 | 0.320891 | ENSG000004TLR2/SNC   | GO_BP |
| GO:002162 | 1  | 1/1117  | 80/20610  | 0.988512 | 0.999923 | 0.23064  | ENSG000004HES1       | GO_BP |
| GO:003352 | 1  | 1/1117  | 80/20610  | 0.988512 | 0.999923 | 0.23064  | ENSG000004TSPO       | GO_BP |
| GO:002152 | 1  | 1/1117  | 84/20610  | 0.990816 | 0.999923 | 0.219657 | ENSG000004HES1       | GO_BP |
| GO:009772 | 1  | 1/1117  | 91/20610  | 0.993793 | 0.999923 | 0.202761 | ENSG000004SLIRP      | GO_BP |
| GO:014002 | 4  | 4/1117  | 193/20610 | 0.993873 | 0.999923 | 0.382408 | ENSG000004MUS81/CAI  | GO_BP |
| GO:006198 | 2  | 2/1117  | 137/20610 | 0.995802 | 0.999923 | 0.269361 | ENSG000004MUS81/KLI  | GO_BP |
| GO:000192 | 4  | 4/1117  | 203/20610 | 0.995988 | 0.999923 | 0.363571 | ENSG000004STAT5A/HI  | GO_BP |
| GO:004512 | 1  | 1/1117  | 99/20610  | 0.996034 | 0.999923 | 0.186376 | ENSG000004MUS81      | GO_BP |
| GO:007172 | 3  | 3/1117  | 177/20610 | 0.996845 | 0.999923 | 0.312732 | ENSG000004VWC2L/UBI  | GO_BP |
| GO:190302 | 4  | 4/1117  | 209/20610 | 0.996897 | 0.999923 | 0.353133 | ENSG000004MUS81/CAI  | GO_BP |
| GO:000170 | 1  | 1/1117  | 108/20610 | 0.997604 | 0.999923 | 0.170845 | ENSG000004ISL2       | GO_BP |
| GO:007200 | 2  | 2/1117  | 150/20610 | 0.997804 | 0.999923 | 0.246016 | ENSG000004HES1/MYC   | GO_BP |
| GO:005080 | 12 | 12/1117 | 451/20610 | 0.998565 | 0.999923 | 0.490941 | ENSG000004PFN1/ABHI  | GO_BP |
| GO:006002 | 2  | 2/1117  | 161/20610 | 0.998738 | 0.999923 | 0.229208 | ENSG000004MAX/IMPDI  | GO_BP |
| GO:005132 | 5  | 5/1117  | 275/20610 | 0.999311 | 0.999923 | 0.335477 | ENSG000004DUSP1/MU   | GO_BP |
| GO:007180 | 3  | 3/1117  | 230/20610 | 0.999741 | 0.999923 | 0.240668 | ENSG000004CD63/KCNI  | GO_BP |



|           |    |         |           |          |          |          |           |                 |
|-----------|----|---------|-----------|----------|----------|----------|-----------|-----------------|
| GO:009880 | 33 | 33/1164 | 101/2173' | 9.32E-18 | 2.86E-15 | 6.101536 | ENSG00000 | (NDUFA7/C)GO_CC |
| GO:007040 | 35 | 35/1164 | 116/2173' | 1.66E-17 | 3.40E-15 | 5.634517 | ENSG00000 | (NDUFA7/C)GO_CC |
| GO:003060 | 55 | 55/1164 | 283/2173' | 5.41E-17 | 4.78E-15 | 3.6293   | ENSG00000 | (LAMP2/TA)GO_CC |
| GO:003190 | 66 | 66/1164 | 393/2173' | 9.90E-17 | 5.85E-15 | 3.136159 | ENSG00000 | (PSMB1/NA)GO_CC |
| GO:199020 | 35 | 35/1164 | 130/2173' | 8.61E-16 | 4.40E-14 | 5.027723 | ENSG00000 | (NDUFA7/N)GO_CC |
| GO:000570 | 25 | 25/1164 | 66/21737  | 1.63E-15 | 6.24E-14 | 7.073636 | ENSG00000 | (NDUFA7/N)GO_CC |
| GO:003090 | 25 | 25/1164 | 66/21737  | 1.63E-15 | 6.24E-14 | 7.073636 | ENSG00000 | (NDUFA7/N)GO_CC |
| GO:000570 | 30 | 30/1164 | 104/2173' | 1.29E-14 | 4.16E-13 | 5.386846 | ENSG00000 | (NDUFA7/N)GO_CC |
| GO:003120 | 50 | 50/1164 | 279/2173' | 4.10E-14 | 1.14E-12 | 3.346666 | ENSG00000 | (TAP2/NA)GO_CC  |
| GO:004430 | 43 | 43/1164 | 216/2173' | 5.86E-14 | 1.56E-12 | 3.717589 | ENSG00000 | (RPL38/M)GO_CC  |
| GO:009880 | 36 | 36/1164 | 158/2173' | 9.19E-14 | 2.35E-12 | 4.254926 | ENSG00000 | (NDUFA7/N)GO_CC |
| GO:000580 | 50 | 50/1164 | 286/2173' | 1.11E-13 | 2.73E-12 | 3.264755 | ENSG00000 | (RPL38/M)GO_CC  |
| GO:009850 | 31 | 31/1164 | 126/2173' | 5.40E-13 | 1.07E-11 | 4.594495 | ENSG00000 | (HLA-DRA)GO_CC  |
| GO:004440 | 44 | 44/1164 | 255/2173' | 5.30E-12 | 9.85E-11 | 3.222249 | ENSG00000 | (NDUFA7/N)GO_CC |
| GO:000590 | 62 | 62/1164 | 467/2173' | 3.80E-11 | 6.29E-10 | 2.479256 | ENSG00000 | (SDCBP/R)GO_CC  |
| GO:003060 | 37 | 37/1164 | 207/2173' | 9.10E-11 | 1.33E-09 | 3.337936 | ENSG00000 | (HLA-DRA)GO_CC  |
| GO:003060 | 41 | 41/1164 | 275/2173' | 2.73E-09 | 3.56E-08 | 2.784183 | ENSG00000 | (HLA-DRA)GO_CC  |
| GO:001970 | 12 | 12/1164 | 27/21737  | 4.32E-09 | 5.52E-08 | 8.299733 | ENSG00000 | (PSMB1/NA)GO_CC |
| GO:003060 | 42 | 42/1164 | 306/2173' | 2.10E-08 | 2.57E-07 | 2.563153 | ENSG00000 | (HLA-DRA)GO_CC  |
| GO:004280 | 11 | 11/1164 | 25/21737  | 2.20E-08 | 2.65E-07 | 8.216735 | ENSG00000 | (TAP2/NA)GO_CC  |
| GO:000580 | 18 | 18/1164 | 74/21737  | 4.80E-08 | 5.56E-07 | 4.542421 | ENSG00000 | (RPL38/V)GO_CC  |
| GO:004420 | 10 | 10/1164 | 23/21737  | 1.13E-07 | 1.25E-06 | 8.119304 | ENSG00000 | (MBOAT7/N)GO_CC |
| GO:000580 | 12 | 12/1164 | 36/21737  | 1.99E-07 | 2.07E-06 | 6.2248   | ENSG00000 | (PSMB1/NA)GO_CC |
| GO:004280 | 8  | 8/1164  | 16/21737  | 5.78E-07 | 5.62E-06 | 9.337199 | ENSG00000 | (TAP2/NA)GO_CC  |
| GO:003060 | 42 | 42/1164 | 353/2173' | 1.11E-06 | 1.05E-05 | 2.221883 | ENSG00000 | (LAMP2/BS)GO_CC |
| GO:007250 | 24 | 24/1164 | 150/2173' | 1.45E-06 | 1.35E-05 | 2.987904 | ENSG00000 | (SDCBP/HS)GO_CC |
| GO:007230 | 7  | 7/1164  | 13/21737  | 1.60E-06 | 1.46E-05 | 10.05545 | ENSG00000 | (PPP1R10)GO_CC  |
| GO:004420 | 10 | 10/1164 | 30/21737  | 2.09E-06 | 1.86E-05 | 6.2248   | ENSG00000 | (MBOAT7/N)GO_CC |
| GO:190530 | 19 | 19/1164 | 106/2173' | 3.19E-06 | 2.75E-05 | 3.347298 | ENSG00000 | (PSMB1/NA)GO_CC |
| GO:000050 | 16 | 16/1164 | 82/21737  | 6.07E-06 | 5.03E-05 | 3.643785 | ENSG00000 | (PSMB1/NA)GO_CC |
| GO:003190 | 35 | 35/1164 | 334/2173' | 0.000121 | 0.000916 | 1.956898 | ENSG00000 | (SDCBP/AL)GO_CC |
| GO:000180 | 9  | 9/1164  | 39/21737  | 0.000173 | 0.001263 | 4.309477 | ENSG00000 | (AIF1/NA)GO_CC  |
| GO:190530 | 10 | 10/1164 | 48/21737  | 0.000189 | 0.001365 | 3.8905   | ENSG00000 | (TSEN34/N)GO_CC |
| GO:000170 | 22 | 22/1164 | 187/2173' | 0.000447 | 0.003113 | 2.196988 | ENSG00000 | (EEF1A1/S)GO_CC |
| GO:000980 | 40 | 40/1164 | 429/2173' | 0.000486 | 0.003346 | 1.741203 | ENSG00000 | (HLA-A/NA)GO_CC |
| GO:004520 | 6  | 6/1164  | 21/21737  | 0.00063  | 0.004225 | 5.335542 | ENSG00000 | (COX8A/CO)GO_CC |
| GO:001620 | 14 | 14/1164 | 101/2173' | 0.000967 | 0.006114 | 2.588531 | ENSG00000 | (GPX1/FBX)GO_CC |
| GO:000030 | 10 | 10/1164 | 59/21737  | 0.001066 | 0.006602 | 3.165152 | ENSG00000 | (MRPL33/M)GO_CC |
| GO:000570 | 10 | 10/1164 | 59/21737  | 0.001066 | 0.006602 | 3.165152 | ENSG00000 | (MRPL33/M)GO_CC |
| GO:000820 | 10 | 10/1164 | 63/21737  | 0.001788 | 0.010393 | 2.96419  | ENSG00000 | (CTDNEP1)GO_CC  |
| GO:190320 | 10 | 10/1164 | 63/21737  | 0.001788 | 0.010393 | 2.96419  | ENSG00000 | (CTDNEP1)GO_CC  |
| GO:003000 | 22 | 22/1164 | 211/2173' | 0.002201 | 0.012493 | 1.947094 | ENSG00000 | (TWF2/AIF)GO_CC |
| GO:003190 | 22 | 22/1164 | 211/2173' | 0.002201 | 0.012493 | 1.947094 | ENSG00000 | (MCL1/PPP)GO_CC |
| GO:004470 | 23 | 23/1164 | 226/2173' | 0.002422 | 0.013495 | 1.900492 | ENSG00000 | (JUNB/CEB)GO_CC |
| GO:000560 | 35 | 35/1164 | 400/2173' | 0.00308  | 0.016276 | 1.63401  | ENSG00000 | (ABT1/PBX)GO_CC |
| GO:003130 | 24 | 24/1164 | 244/2173' | 0.003084 | 0.016276 | 1.836826 | ENSG00000 | (LAMP2/AB)GO_CC |
| GO:000820 | 4  | 4/1164  | 13/21737  | 0.003962 | 0.019745 | 5.745969 | ENSG00000 | (TMEM258)GO_CC  |
| GO:003080 | 15 | 15/1164 | 133/2173' | 0.00509  | 0.024764 | 2.106135 | ENSG00000 | (ZNRD1/NA)GO_CC |
| GO:000800 | 20 | 20/1164 | 199/2173' | 0.005154 | 0.024876 | 1.876824 | ENSG00000 | (CALM3/DG)GO_CC |
| GO:003120 | 36 | 36/1164 | 430/2173' | 0.005509 | 0.02621  | 1.563438 | ENSG00000 | (EEF1A1/S)GO_CC |
| GO:000030 | 12 | 12/1164 | 97/21737  | 0.005601 | 0.02621  | 2.310235 | ENSG00000 | (MRPL33/N)GO_CC |
| GO:000570 | 12 | 12/1164 | 97/21737  | 0.005601 | 0.02621  | 2.310235 | ENSG00000 | (MRPL33/N)GO_CC |
| GO:007100 | 12 | 12/1164 | 97/21737  | 0.005601 | 0.02621  | 2.310235 | ENSG00000 | (SRSF1/S)GO_CC  |
| GO:003130 | 21 | 21/1164 | 221/2173' | 0.007942 | 0.035278 | 1.77449  | ENSG00000 | (LAMP2/S)GO_CC  |

|           |    |         |           |          |          |          |                          |
|-----------|----|---------|-----------|----------|----------|----------|--------------------------|
| GO:009858 | 31 | 31/1164 | 368/2173' | 0.008737 | 0.03853  | 1.573115 | ENSG0000(LAMP2/SD(GO_CC  |
| GO:009879 | 4  | 4/1164  | 16/21737  | 0.00887  | 0.03884  | 4.6686   | ENSG0000(TOMM22/T(GO_CC  |
| GO:003129 | 18 | 18/1164 | 183/2173' | 0.009529 | 0.041427 | 1.836826 | ENSG0000(EEF1A1/A(GO_CC  |
| GO:003122 | 18 | 18/1164 | 189/2173' | 0.013012 | 0.055009 | 1.778514 | ENSG0000(BST2/ABHI(GO_CC |
| GO:000568 | 20 | 20/1164 | 218/2173' | 0.013514 | 0.05674  | 1.713248 | ENSG0000(SRSF1/SNI(GO_CC |
| GO:009888 | 29 | 29/1164 | 355/2173' | 0.01608  | 0.066603 | 1.525514 | ENSG0000(LAMP2/SD(GO_CC  |
| GO:000083 | 3  | 3/1164  | 11/21737  | 0.018283 | 0.073251 | 5.093018 | ENSG0000(CHMP2A/CIGO_CC  |
| GO:009857 | 9  | 9/1164  | 79/21737  | 0.025064 | 0.09786  | 2.127463 | ENSG0000(SMDT1/NA(GO_CC  |
| GO:003000 | 3  | 3/1164  | 14/21737  | 0.035791 | 0.137126 | 4.001657 | ENSG0000(TRAPPC5/'GO_CC  |
| GO:000598 | 3  | 3/1164  | 15/21737  | 0.043004 | 0.158802 | 3.73488  | ENSG0000(PRKAR1A/IGO_CC  |
| GO:003317 | 3  | 3/1164  | 16/21737  | 0.05088  | 0.180288 | 3.50145  | ENSG0000(ATP6V1B2,GO_CC  |
| GO:004309 | 3  | 3/1164  | 16/21737  | 0.05088  | 0.180288 | 3.50145  | ENSG0000(NCF4/NA/IGO_CC  |
| GO:002262 | 4  | 4/1164  | 27/21737  | 0.053804 | 0.188469 | 2.766578 | ENSG0000(PSME1/NA,GO_CC  |
| GO:003080 | 4  | 4/1164  | 27/21737  | 0.053804 | 0.188469 | 2.766578 | ENSG0000(ARL6IP1/'GO_CC  |
| GO:009952 | 3  | 3/1164  | 18/21737  | 0.068542 | 0.237381 | 3.1124   | ENSG0000(EIF4A3/DIGO_CC  |
| GO:000593 | 24 | 24/1164 | 325/2173' | 0.07003  | 0.24117  | 1.379033 | ENSG0000(EEF1A1/PIGO_CC  |
| GO:000590 | 10 | 10/1164 | 110/2173' | 0.070529 | 0.241531 | 1.697673 | ENSG0000(CLIC1/NA,GO_CC  |
| GO:003509 | 3  | 3/1164  | 19/21737  | 0.078276 | 0.260779 | 2.948589 | ENSG0000(PHF1/NA/IGO_CC  |
| GO:001640 | 6  | 6/1164  | 57/21737  | 0.083387 | 0.274817 | 1.965726 | ENSG0000(ATP6V1B2,GO_CC  |
| GO:007099 | 3  | 3/1164  | 20/21737  | 0.088574 | 0.288807 | 2.80116  | ENSG0000(EIF1/EIF(GO_CC  |
| GO:003470 | 11 | 11/1164 | 130/2173' | 0.089326 | 0.289718 | 1.580141 | ENSG0000(SNRPF/WDIGO_CC  |
| GO:004320 | 12 | 12/1164 | 149/2173' | 0.103682 | 0.322624 | 1.503978 | ENSG0000(AIF1/NA/IGO_CC  |
| GO:009850 | 5  | 5/1164  | 48/21737  | 0.112636 | 0.34523  | 1.94525  | ENSG0000(RAB11B/R(GO_CC  |
| GO:000018 | 21 | 21/1164 | 298/2173' | 0.121752 | 0.365851 | 1.315981 | ENSG0000(CBX7/GID(GO_CC  |
| GO:004693 | 3  | 3/1164  | 23/21737  | 0.12253  | 0.366395 | 2.435791 | ENSG0000(PPIF/BAK(GO_CC  |
| GO:000173 | 4  | 4/1164  | 36/21737  | 0.124689 | 0.367471 | 2.074933 | ENSG0000(LGALS3/CIGO_CC  |
| GO:004320 | 5  | 5/1164  | 52/21737  | 0.144418 | 0.413649 | 1.795615 | ENSG0000(CALM3/TUIGO_CC  |
| GO:009850 | 14 | 14/1164 | 191/2173' | 0.145757 | 0.413649 | 1.368804 | ENSG0000(EEF1A1/S(GO_CC  |
| GO:000854 | 2  | 2/1164  | 13/21737  | 0.151357 | 0.413649 | 2.872984 | ENSG0000(PSMC4/NA(GO_CC  |
| GO:009884 | 2  | 2/1164  | 13/21737  | 0.151357 | 0.413649 | 2.872984 | ENSG0000(ABHD17A/IGO_CC  |
| GO:009899 | 2  | 2/1164  | 13/21737  | 0.151357 | 0.413649 | 2.872984 | ENSG0000(RAB11B/R(GO_CC  |
| GO:000160 | 9  | 9/1164  | 113/2173' | 0.151829 | 0.413649 | 1.487341 | ENSG0000(CALR/NCF(GO_CC  |
| GO:000989 | 12 | 12/1164 | 163/2173' | 0.164929 | 0.443426 | 1.374802 | ENSG0000(S100A6/R(GO_CC  |
| GO:009880 | 12 | 12/1164 | 163/2173' | 0.164929 | 0.443426 | 1.374802 | ENSG0000(TWF2/CLI(GO_CC  |
| GO:003197 | 8  | 8/1164  | 100/2173' | 0.167062 | 0.44506  | 1.493952 | ENSG0000(TXNIP/CO(GO_CC  |
| GO:000078 | 2  | 2/1164  | 14/21737  | 0.170618 | 0.44506  | 2.667771 | ENSG0000(TINF2/NA(GO_CC  |
| GO:004527 | 2  | 2/1164  | 14/21737  | 0.170618 | 0.44506  | 2.667771 | ENSG0000(UQCR10/M(GO_CC  |
| GO:007103 | 2  | 2/1164  | 14/21737  | 0.170618 | 0.44506  | 2.667771 | ENSG0000(EIF4A3/S(GO_CC  |
| GO:004319 | 13 | 13/1164 | 181/2173' | 0.173647 | 0.447389 | 1.341255 | ENSG0000(ABHD17A/IGO_CC  |
| GO:000564 | 3  | 3/1164  | 27/21737  | 0.173701 | 0.447389 | 2.074933 | ENSG0000(TMEM109/'GO_CC  |
| GO:001400 | 23 | 23/1164 | 349/2173' | 0.178663 | 0.458244 | 1.230691 | ENSG0000(RPL38/RPIGO_CC  |
| GO:003108 | 2  | 2/1164  | 15/21737  | 0.190251 | 0.474081 | 2.48992  | ENSG0000(BLOC1S4/IGO_CC  |
| GO:003122 | 2  | 2/1164  | 15/21737  | 0.190251 | 0.474081 | 2.48992  | ENSG0000(LBR/TMEM(GO_CC  |
| GO:003227 | 23 | 23/1164 | 353/2173' | 0.192868 | 0.478657 | 1.216746 | ENSG0000(RPL38/RPIGO_CC  |
| GO:000030 | 4  | 4/1164  | 43/21737  | 0.197012 | 0.486969 | 1.737153 | ENSG0000(CDKN2D/C(GO_CC  |
| GO:004257 | 2  | 2/1164  | 16/21737  | 0.210161 | 0.509205 | 2.3343   | ENSG0000(POLE4/CHIGO_CC  |
| GO:004449 | 2  | 2/1164  | 16/21737  | 0.210161 | 0.509205 | 2.3343   | ENSG0000(LBR/TMEM(GO_CC  |
| GO:003577 | 17 | 17/1164 | 260/2173' | 0.231354 | 0.53924  | 1.221018 | ENSG0000(PATL1/HNIGO_CC  |
| GO:004878 | 3  | 3/1164  | 32/21737  | 0.244104 | 0.564663 | 1.750725 | ENSG0000(DGKI/STX(GO_CC  |
| GO:003049 | 12 | 12/1164 | 178/2173' | 0.246312 | 0.565503 | 1.258948 | ENSG0000(FLCN/JTB,GO_CC  |
| GO:003129 | 24 | 24/1164 | 386/2173' | 0.253098 | 0.578915 | 1.161103 | ENSG0000(EEF1A1/A(GO_CC  |
| GO:004517 | 5  | 5/1164  | 64/21737  | 0.257662 | 0.587163 | 1.458937 | ENSG0000(AAMP/UNC(GO_CC  |
| GO:003122 | 5  | 5/1164  | 65/21737  | 0.267969 | 0.603916 | 1.436492 | ENSG0000(SLC35A2/IGO_CC  |
| GO:009957 | 23 | 23/1164 | 375/2173' | 0.280114 | 0.628974 | 1.145363 | ENSG0000(RPL38/RPIGO_CC  |

|           |            |           |          |          |          |                           |
|-----------|------------|-----------|----------|----------|----------|---------------------------|
| GO:003028 | 3 3/1164   | 35/21737  | 0.288267 | 0.639315 | 1.600663 | ENSG0000(VAMP1/ST)GO_CC   |
| GO:000584 | 2 2/1164   | 20/21737  | 0.290977 | 0.639315 | 1.86744  | ENSG0000(PIP5K1A/IG)GO_CC |
| GO:003471 | 2 2/1164   | 20/21737  | 0.290977 | 0.639315 | 1.86744  | ENSG0000(SNRPF/SNIG)GO_CC |
| GO:003068 | 6 6/1164   | 84/21737  | 0.294124 | 0.643922 | 1.333886 | ENSG0000(NGDN/EBN)GO_CC   |
| GO:000569 | 2 2/1164   | 21/21737  | 0.311143 | 0.66923  | 1.778514 | ENSG0000(NOP10/SNIG)GO_CC |
| GO:003510 | 2 2/1164   | 21/21737  | 0.311143 | 0.66923  | 1.778514 | ENSG0000(CBX7/CBX)GO_CC   |
| GO:004319 | 4 4/1164   | 53/21737  | 0.315425 | 0.674599 | 1.409389 | ENSG0000(SNCA/TNN)GO_CC   |
| GO:009754 | 3 3/1164   | 37/21737  | 0.318041 | 0.674599 | 1.51414  | ENSG0000(PRKAR1A/IG)GO_CC |
| GO:001989 | 19 19/1164 | 315/21737 | 0.329414 | 0.695259 | 1.126392 | ENSG0000(S100A6/D)GO_CC   |
| GO:000583 | 2 2/1164   | 22/21737  | 0.331184 | 0.695259 | 1.697673 | ENSG0000(PSMC4/NA)GO_CC   |
| GO:004529 | 2 2/1164   | 22/21737  | 0.331184 | 0.695259 | 1.697673 | ENSG0000(PPIF/MT)GO_CC    |
| GO:004367 | 8 8/1164   | 124/21737 | 0.34613  | 0.715593 | 1.2048   | ENSG0000(DGKI/SRI)GO_CC   |
| GO:003067 | 7 7/1164   | 107/21737 | 0.349005 | 0.715593 | 1.22169  | ENSG0000(CALM3/RAIG)GO_CC |
| GO:004430 | 9 9/1164   | 143/21737 | 0.358222 | 0.724721 | 1.175312 | ENSG0000(DGKI/SRI)GO_CC   |
| GO:006202 | 25 25/1164 | 438/21737 | 0.400071 | 0.784175 | 1.06589  | ENSG0000(CSTB/S10)GO_CC   |
| GO:000011 | 4 4/1164   | 60/21737  | 0.401682 | 0.784175 | 1.24496  | ENSG0000(SIN3B/DN)GO_CC   |
| GO:004429 | 5 5/1164   | 79/21737  | 0.417342 | 0.797519 | 1.181924 | ENSG0000(FLCN/RAP)GO_CC   |
| GO:009889 | 1 1/1164   | 10/21737  | 0.423327 | 0.797519 | 1.86744  | ENSG0000(DGKI)GO_CC       |
| GO:199072 | 1 1/1164   | 10/21737  | 0.423327 | 0.797519 | 1.86744  | ENSG0000(LSM7)GO_CC       |
| GO:190249 | 20 20/1164 | 354/21737 | 0.435212 | 0.811773 | 1.055051 | ENSG0000(CALM3/SMIG)GO_CC |
| GO:000594 | 2 2/1164   | 28/21737  | 0.446656 | 0.811773 | 1.333886 | ENSG0000(CISH/SOC)GO_CC   |
| GO:003089 | 2 2/1164   | 28/21737  | 0.446656 | 0.811773 | 1.333886 | ENSG0000(PURA/PCN)GO_CC   |
| GO:003124 | 6 6/1164   | 100/21737 | 0.447864 | 0.811773 | 1.120464 | ENSG0000(POLE4/MSIG)GO_CC |
| GO:000023 | 1 1/1164   | 11/21737  | 0.454222 | 0.811773 | 1.697673 | ENSG0000(MAPRE1)GO_CC     |
| GO:000211 | 1 1/1164   | 11/21737  | 0.454222 | 0.811773 | 1.697673 | ENSG0000(PLXND1)GO_CC     |
| GO:003086 | 1 1/1164   | 11/21737  | 0.454222 | 0.811773 | 1.697673 | ENSG0000(PGRMC1)GO_CC     |
| GO:006182 | 1 1/1164   | 11/21737  | 0.454222 | 0.811773 | 1.697673 | ENSG0000(ALDOA)GO_CC      |
| GO:001988 | 10 10/1164 | 174/21737 | 0.455628 | 0.811919 | 1.073241 | ENSG0000(S100A6/D)GO_CC   |
| GO:000571 | 2 2/1164   | 29/21737  | 0.464838 | 0.822402 | 1.28789  | ENSG0000(SNRPF/NOIG)GO_CC |
| GO:003326 | 22 22/1164 | 397/21737 | 0.465536 | 0.822402 | 1.034853 | ENSG0000(TWF2/DYNIG)GO_CC |
| GO:003120 | 3 3/1164   | 48/21737  | 0.478215 | 0.82323  | 1.16715  | ENSG0000(STX4/STX)GO_CC   |
| GO:003009 | 2 2/1164   | 30/21737  | 0.482662 | 0.82323  | 1.24496  | ENSG0000(JUP/DSC2)GO_CC   |
| GO:004524 | 1 1/1164   | 12/21737  | 0.483463 | 0.82323  | 1.5562   | ENSG0000(KAT2A)GO_CC      |
| GO:009914 | 1 1/1164   | 12/21737  | 0.483463 | 0.82323  | 1.5562   | ENSG0000(ABHD17A)GO_CC    |
| GO:012011 | 1 1/1164   | 12/21737  | 0.483463 | 0.82323  | 1.5562   | ENSG0000(LSM7)GO_CC       |
| GO:003042 | 10 10/1164 | 180/21737 | 0.498744 | 0.838441 | 1.037467 | ENSG0000(TWF2/DYNIG)GO_CC |
| GO:003053 | 7 7/1164   | 125/21737 | 0.506971 | 0.838441 | 1.045766 | ENSG0000(SNRPF/LS)GO_CC   |
| GO:004489 | 7 7/1164   | 125/21737 | 0.506971 | 0.838441 | 1.045766 | ENSG0000(ITGB2/SL)GO_CC   |
| GO:003228 | 1 1/1164   | 13/21737  | 0.511138 | 0.838441 | 1.436492 | ENSG0000(NTSR1)GO_CC      |
| GO:004262 | 1 1/1164   | 13/21737  | 0.511138 | 0.838441 | 1.436492 | ENSG0000(APOBR)GO_CC      |
| GO:004526 | 1 1/1164   | 13/21737  | 0.511138 | 0.838441 | 1.436492 | ENSG0000(MT-ATP6)GO_CC    |
| GO:012013 | 5 5/1164   | 88/21737  | 0.511545 | 0.838441 | 1.061045 | ENSG0000(BLOC1S4/)GO_CC   |
| GO:009722 | 11 11/1164 | 201/21737 | 0.514556 | 0.841128 | 1.021982 | ENSG0000(GABARAP/)GO_CC   |
| GO:003133 | 3 3/1164   | 52/21737  | 0.532249 | 0.844576 | 1.077369 | ENSG0000(CCDC115/)GO_CC   |
| GO:003204 | 1 1/1164   | 14/21737  | 0.537332 | 0.844576 | 1.333886 | ENSG0000(DGKI)GO_CC       |
| GO:003364 | 1 1/1164   | 14/21737  | 0.537332 | 0.844576 | 1.333886 | ENSG0000(GBP2)GO_CC       |
| GO:004365 | 1 1/1164   | 14/21737  | 0.537332 | 0.844576 | 1.333886 | ENSG0000(GBP2)GO_CC       |
| GO:009924 | 1 1/1164   | 14/21737  | 0.537332 | 0.844576 | 1.333886 | ENSG0000(DGKI)GO_CC       |
| GO:009952 | 1 1/1164   | 14/21737  | 0.537332 | 0.844576 | 1.333886 | ENSG0000(HSPA8)GO_CC      |
| GO:003043 | 10 10/1164 | 186/21737 | 0.54091  | 0.848025 | 1.004    | ENSG0000(TWF2/DYNIG)GO_CC |
| GO:000153 | 4 4/1164   | 72/21737  | 0.542857 | 0.848906 | 1.037467 | ENSG0000(CSTA/JUP)GO_CC   |
| GO:003158 | 1 1/1164   | 15/21737  | 0.562124 | 0.862897 | 1.24496  | ENSG0000(PRKAR1A)GO_CC    |
| GO:003820 | 1 1/1164   | 15/21737  | 0.562124 | 0.862897 | 1.24496  | ENSG0000(AKT1S1)GO_CC     |
| GO:000592 | 2 2/1164   | 35/21737  | 0.566    | 0.862897 | 1.067108 | ENSG0000(PANX2/DB)GO_CC   |

|           |    |         |           |          |          |          |                      |     |
|-----------|----|---------|-----------|----------|----------|----------|----------------------|-----|
| GO:00312: | 5  | 5/1164  | 94/21737  | 0.570739 | 0.862897 | 0.993319 | ENSG0000(S100A6/RIGO | _CC |
| GO:00316: | 8  | 8/1164  | 152/21737 | 0.571185 | 0.862897 | 0.982863 | ENSG0000(SRI/SLC4    | _GO |
| GO:00432: | 8  | 8/1164  | 152/21737 | 0.571185 | 0.862897 | 0.982863 | ENSG0000(RHOA/RAP    | _GO |
| GO:00436: | 4  | 4/1164  | 75/21737  | 0.575474 | 0.862897 | 0.995968 | ENSG0000(DYNLT1/IIGO | _CC |
| GO:00336: | 1  | 1/1164  | 16/21737  | 0.585588 | 0.862897 | 1.16715  | ENSG0000(GBP2        | _GO |
| GO:00321: | 3  | 3/1164  | 57/21737  | 0.595106 | 0.87482  | 0.982863 | ENSG0000(RHOB/RHO    | _GO |
| GO:00340: | 1  | 1/1164  | 17/21737  | 0.607796 | 0.878723 | 1.098494 | ENSG0000(RAB1B       | _GO |
| GO:00985: | 1  | 1/1164  | 17/21737  | 0.607796 | 0.878723 | 1.098494 | ENSG0000(RPL27       | _GO |
| GO:00300: | 11 | 11/1164 | 216/21737 | 0.611482 | 0.881895 | 0.951011 | ENSG0000(CALM3/SR    | _GO |
| GO:00330: | 2  | 2/1164  | 39/21737  | 0.62539  | 0.881895 | 0.957661 | ENSG0000(SRI/TMEM    | _GO |
| GO:00059: | 4  | 4/1164  | 80/21737  | 0.626769 | 0.881895 | 0.93372  | ENSG0000(ARRB2/CT    | _GO |
| GO:00001: | 1  | 1/1164  | 18/21737  | 0.628814 | 0.881895 | 1.037467 | ENSG0000(PPP1R15A    | _GO |
| GO:00485: | 1  | 1/1164  | 18/21737  | 0.628814 | 0.881895 | 1.037467 | ENSG0000(SRP68       | _GO |
| GO:00300: | 7  | 7/1164  | 141/21737 | 0.635178 | 0.881895 | 0.927098 | ENSG0000(SRI/SLC4    | _GO |
| GO:00316: | 2  | 2/1164  | 40/21737  | 0.639215 | 0.881895 | 0.93372  | ENSG0000(MYL4/ALD    | _GO |
| GO:00163: | 3  | 3/1164  | 61/21737  | 0.641255 | 0.881895 | 0.918413 | ENSG0000(JUP/DVL2    | _GO |
| GO:00001: | 1  | 1/1164  | 19/21737  | 0.648707 | 0.881895 | 0.982863 | ENSG0000(TNFAIP2     | _GO |
| GO:00163: | 1  | 1/1164  | 19/21737  | 0.648707 | 0.881895 | 0.982863 | ENSG0000(JUP         | _GO |
| GO:00971: | 1  | 1/1164  | 19/21737  | 0.648707 | 0.881895 | 0.982863 | ENSG0000(CD81        | _GO |
| GO:00442: | 4  | 4/1164  | 83/21737  | 0.655578 | 0.881895 | 0.899971 | ENSG0000(DYNLT1/IIGO | _CC |
| GO:00019: | 1  | 1/1164  | 20/21737  | 0.667535 | 0.881895 | 0.93372  | ENSG0000(MSN         | _GO |
| GO:00312: | 1  | 1/1164  | 20/21737  | 0.667535 | 0.881895 | 0.93372  | ENSG0000(MSN         | _GO |
| GO:00343: | 1  | 1/1164  | 20/21737  | 0.667535 | 0.881895 | 0.93372  | ENSG0000(APOBR       | _GO |
| GO:19027: | 1  | 1/1164  | 20/21737  | 0.667535 | 0.881895 | 0.93372  | ENSG0000(GABRG1      | _GO |
| GO:00343: | 2  | 2/1164  | 44/21737  | 0.690507 | 0.889245 | 0.848836 | ENSG0000(APOBR/HPIGO | _CC |
| GO:19907: | 2  | 2/1164  | 44/21737  | 0.690507 | 0.889245 | 0.848836 | ENSG0000(APOBR/HPIGO | _CC |
| GO:00059: | 6  | 6/1164  | 130/21737 | 0.702068 | 0.896287 | 0.861895 | ENSG0000(MAP1LC3B    | _GO |
| GO:00319: | 3  | 3/1164  | 67/21737  | 0.703286 | 0.896287 | 0.836167 | ENSG0000(ARF1/HMG    | _GO |
| GO:00970: | 6  | 6/1164  | 131/21737 | 0.709025 | 0.898446 | 0.855316 | ENSG0000(MAP1LC3B    | _GO |
| GO:00321: | 3  | 3/1164  | 68/21737  | 0.712785 | 0.898446 | 0.823871 | ENSG0000(RHOB/RHO    | _GO |
| GO:00444: | 11 | 11/1164 | 234/21737 | 0.713773 | 0.898446 | 0.877856 | ENSG0000(CALM3/SR    | _GO |
| GO:00020: | 1  | 1/1164  | 23/21737  | 0.718182 | 0.898461 | 0.81193  | ENSG0000(BSG         | _GO |
| GO:00331: | 1  | 1/1164  | 23/21737  | 0.718182 | 0.898461 | 0.81193  | ENSG0000(MT-ATP6     | _GO |
| GO:00701: | 6  | 6/1164  | 137/21737 | 0.74842  | 0.923102 | 0.817857 | ENSG0000(RAP2B/DD    | _GO |
| GO:00321: | 3  | 3/1164  | 73/21737  | 0.756777 | 0.927567 | 0.767441 | ENSG0000(RHOB/RHO    | _GO |
| GO:00300: | 1  | 1/1164  | 26/21737  | 0.761119 | 0.927567 | 0.718246 | ENSG0000(PATL1       | _GO |
| GO:00343: | 1  | 1/1164  | 26/21737  | 0.761119 | 0.927567 | 0.718246 | ENSG0000(APOBR       | _GO |
| GO:00972: | 1  | 1/1164  | 26/21737  | 0.761119 | 0.927567 | 0.718246 | ENSG0000(GABARAP     | _GO |
| GO:00328: | 1  | 1/1164  | 27/21737  | 0.773927 | 0.935734 | 0.691644 | ENSG0000(KCNE3       | _GO |
| GO:00442: | 1  | 1/1164  | 28/21737  | 0.786048 | 0.944057 | 0.666943 | ENSG0000(KCNE3       | _GO |
| GO:00361: | 4  | 4/1164  | 100/21737 | 0.789759 | 0.944057 | 0.746976 | ENSG0000(GABARAP     | _GO |
| GO:00303: | 2  | 2/1164  | 54/21737  | 0.79273  | 0.944057 | 0.691644 | ENSG0000(SRI/BIN1    | _GO |
| GO:00324: | 2  | 2/1164  | 54/21737  | 0.79273  | 0.944057 | 0.691644 | ENSG0000(TWF2/MPP    | _GO |
| GO:00314: | 1  | 1/1164  | 29/21737  | 0.797519 | 0.944057 | 0.643945 | ENSG0000(ALDOA       | _GO |
| GO:00487: | 3  | 3/1164  | 80/21737  | 0.809039 | 0.950078 | 0.70029  | ENSG0000(DGKI/STX    | _GO |
| GO:00058: | 1  | 1/1164  | 31/21737  | 0.818652 | 0.950395 | 0.6024   | ENSG0000(GNAI2       | _GO |
| GO:00083: | 1  | 1/1164  | 31/21737  | 0.818652 | 0.950395 | 0.6024   | ENSG0000(ITGB2       | _GO |
| GO:00905: | 1  | 1/1164  | 31/21737  | 0.818652 | 0.950395 | 0.6024   | ENSG0000(MTA2        | _GO |
| GO:19053: | 1  | 1/1164  | 31/21737  | 0.818652 | 0.950395 | 0.6024   | ENSG0000(GNAI2       | _GO |
| GO:00324: | 2  | 2/1164  | 59/21737  | 0.831696 | 0.953038 | 0.63303  | ENSG0000(TWF2/MPP    | _GO |
| GO:00343: | 1  | 1/1164  | 33/21737  | 0.837581 | 0.957778 | 0.565891 | ENSG0000(HPR         | _GO |
| GO:00988: | 8  | 8/1164  | 200/21737 | 0.845528 | 0.957778 | 0.746976 | ENSG0000(SDCBP/B2    | _GO |
| GO:00444: | 4  | 4/1164  | 110/21737 | 0.846845 | 0.957778 | 0.679069 | ENSG0000(ARF1/HMG    | _GO |
| GO:00431: | 1  | 1/1164  | 40/21737  | 0.889582 | 0.993286 | 0.46686  | ENSG0000(NTSR1       | _GO |

|           |    |         |           |          |          |          |                           |
|-----------|----|---------|-----------|----------|----------|----------|---------------------------|
| GO:003011 | 3  | 3/1164  | 100/2173  | 0.908874 | 0.999884 | 0.560232 | ENSG000001CHMP2A/AIGO_CC  |
| GO:004271 | 6  | 6/1164  | 175/2173  | 0.911995 | 0.999884 | 0.640265 | ENSG000001DGKI/APHIGO_CC  |
| GO:009754 | 1  | 1/1164  | 45/2173   | 0.916191 | 0.999884 | 0.414987 | ENSG000001ULK3GO_CC       |
| GO:009883 | 2  | 2/1164  | 76/2173   | 0.919502 | 0.999884 | 0.491432 | ENSG000001ABHD17A/IGO_CC  |
| GO:190494 | 4  | 4/1164  | 131/2173  | 0.925203 | 0.999884 | 0.570211 | ENSG000001ZNHIT1/IIGO_CC  |
| GO:003011 | 1  | 1/1164  | 48/2173   | 0.928972 | 0.999884 | 0.38905  | ENSG000001AP5B1GO_CC      |
| GO:003600 | 4  | 4/1164  | 139/2173  | 0.943951 | 0.999884 | 0.537393 | ENSG000001RILP/NA/IGO_CC  |
| GO:003028 | 1  | 1/1164  | 54/2173   | 0.948988 | 0.999884 | 0.345822 | ENSG000001DYNLT1GO_CC     |
| GO:009914 | 1  | 1/1164  | 54/2173   | 0.948988 | 0.999884 | 0.345822 | ENSG000001ABHD17AGO_CC    |
| GO:001632 | 8  | 8/1164  | 244/2173  | 0.953116 | 0.999884 | 0.612275 | ENSG000001AQP3/ARRIGO_CC  |
| GO:004238 | 4  | 4/1164  | 147/2173  | 0.95831  | 0.999884 | 0.508147 | ENSG000001SRI/SLC2/GO_CC  |
| GO:003258 | 1  | 1/1164  | 60/2173   | 0.963367 | 0.999884 | 0.31124  | ENSG000001GABRG1GO_CC     |
| GO:001632 | 12 | 12/1164 | 354/2173  | 0.969141 | 0.999884 | 0.63303  | ENSG000001BST2/ATP/GO_CC  |
| GO:004521 | 12 | 12/1164 | 357/2173  | 0.971516 | 0.999884 | 0.627711 | ENSG000001ABHD17A/IGO_CC  |
| GO:000591 | 3  | 3/1164  | 129/2173  | 0.971663 | 0.999884 | 0.434288 | ENSG000001S100A11/GO_CC   |
| GO:003580 | 1  | 1/1164  | 67/2173   | 0.975108 | 0.999884 | 0.278722 | ENSG000001UNC119BGO_CC    |
| GO:003151 | 5  | 5/1164  | 191/2173  | 0.977903 | 0.999884 | 0.488859 | ENSG000001GABARAP/GO_CC   |
| GO:009963 | 2  | 2/1164  | 105/2173  | 0.978748 | 0.999884 | 0.355703 | ENSG000001ABHD17A/IGO_CC  |
| GO:009700 | 16 | 16/1164 | 470/2173  | 0.982716 | 0.999884 | 0.635724 | ENSG000001ABHD17A/IGO_CC  |
| GO:004511 | 14 | 14/1164 | 426/2173  | 0.984055 | 0.999884 | 0.613713 | ENSG000001BST2/ATP/GO_CC  |
| GO:009894 | 1  | 1/1164  | 80/2173   | 0.987859 | 0.999884 | 0.23343  | ENSG000001ABHD17AGO_CC    |
| GO:009888 | 1  | 1/1164  | 84/2173   | 0.990266 | 0.999884 | 0.222314 | ENSG000001APH1A GO_CC     |
| GO:006011 | 1  | 1/1164  | 101/2173  | 0.996197 | 0.999884 | 0.184895 | ENSG000001BBS5 GO_CC      |
| GO:000078 | 1  | 1/1164  | 109/2173  | 0.997557 | 0.999884 | 0.171325 | ENSG000001IRF4 GO_CC      |
| GO:000071 | 1  | 1/1164  | 114/2173  | 0.998147 | 0.999884 | 0.163811 | ENSG000001DCTN3 GO_CC     |
| GO:009924 | 2  | 2/1164  | 176/2173  | 0.999341 | 0.999884 | 0.212209 | ENSG000001ABHD17A/I/GO_CC |
| GO:009893 | 1  | 1/1164  | 134/2173  | 0.999388 | 0.999884 | 0.139361 | ENSG000001ABHD17A GO_CC   |
| GO:004444 | 11 | 11/1164 | 495/2173  | 0.999852 | 0.999884 | 0.414987 | ENSG000001RILP/NA/I/GO_CC |
| GO:009969 | 1  | 1/1164  | 164/2173  | 0.999884 | 0.999884 | 0.113868 | ENSG000001APH1A GO_CC     |
| GO:003088 | 16 | 16/1121 | 25/19728  | 1.34E-14 | 2.39E-12 | 11.26309 | ENSG000001HLA-A/NA,GO_MF  |
| GO:002302 | 24 | 24/1121 | 70/19728  | 2.86E-13 | 4.26E-11 | 6.033796 | ENSG000001HLA-DRA/I/GO_MF |
| GO:004691 | 15 | 15/1121 | 28/19728  | 3.53E-12 | 2.63E-10 | 9.427807 | ENSG000001TAP2/NA/I/GO_MF |
| GO:004260 | 29 | 29/1121 | 118/19728 | 1.29E-11 | 8.25E-10 | 4.325073 | ENSG000001HLA-DRA/I/GO_MF |
| GO:001663 | 29 | 29/1121 | 127/19728 | 8.87E-11 | 4.67E-09 | 4.018572 | ENSG000001NDUFA7/G/GO_MF  |
| GO:004221 | 50 | 50/1121 | 409/19728 | 2.73E-07 | 9.77E-06 | 2.151415 | ENSG000001HLA-DRA/I/GO_MF |
| GO:004288 | 15 | 15/1121 | 68/19728  | 4.89E-06 | 0.000118 | 3.882038 | ENSG000001MCL1/TAP/GO_MF  |
| GO:007188 | 10 | 10/1121 | 35/19728  | 1.68E-05 | 0.000349 | 5.028164 | ENSG000001IRS2/ARRIGO_MF  |
| GO:004418 | 9  | 9/1121  | 35/19728  | 0.00011  | 0.001971 | 4.525347 | ENSG000001HSPA6/CAIGO_MF  |
| GO:001500 | 8  | 8/1121  | 28/19728  | 0.000119 | 0.002001 | 5.028164 | ENSG000001COX8A/CO/GO_MF  |
| GO:001661 | 8  | 8/1121  | 29/19728  | 0.000156 | 0.002531 | 4.854779 | ENSG000001COX8A/CO/GO_MF  |
| GO:009774 | 11 | 11/1121 | 56/19728  | 0.000267 | 0.004181 | 3.456862 | ENSG000001ZNRD1/NA,GO_MF  |
| GO:000903 | 17 | 17/1121 | 116/19728 | 0.000294 | 0.004536 | 2.579101 | ENSG000001COX8A/UQ/GO_MF  |
| GO:005178 | 9  | 9/1121  | 45/19728  | 0.000829 | 0.012153 | 3.519715 | ENSG000001HSPA6/HSIGO_MF  |
| GO:000372 | 14 | 14/1121 | 100/19728 | 0.001537 | 0.021468 | 2.4638   | ENSG000001DHX58/EIIGO_MF  |
| GO:001980 | 8  | 8/1121  | 40/19728  | 0.0016   | 0.022012 | 3.519715 | ENSG000001FCGR3B/L/GO_MF  |
| GO:001679 | 16 | 16/1121 | 127/19728 | 0.002272 | 0.029432 | 2.217143 | ENSG000001LYZ/PSAP,GO_MF  |
| GO:000550 | 7  | 7/1121  | 35/19728  | 0.003108 | 0.039693 | 3.519715 | ENSG000001S100A8/AIGO_MF  |
| GO:003024 | 7  | 7/1121  | 36/19728  | 0.003672 | 0.044972 | 3.421945 | ENSG000001HLA-DRA/I/GO_MF |
| GO:000483 | 38 | 38/1121 | 429/19728 | 0.004569 | 0.054465 | 1.558848 | ENSG000001CSTB/BST/GO_MF  |
| GO:001620 | 4  | 4/1121  | 13/19728  | 0.004903 | 0.057674 | 5.414945 | ENSG000001APRT/CYB/GO_MF  |
| GO:000454 | 15 | 15/1121 | 127/19728 | 0.005657 | 0.064834 | 2.078572 | ENSG000001RNASE2/Z/GO_MF  |
| GO:001920 | 14 | 14/1121 | 116/19728 | 0.006096 | 0.068986 | 2.123966 | ENSG000001CALM3/PPIGO_MF  |
| GO:005108 | 17 | 17/1121 | 153/19728 | 0.006237 | 0.069695 | 1.955397 | ENSG000001AAMP/HSP/GO_MF  |
| GO:000832 | 5  | 5/1121  | 22/19728  | 0.006872 | 0.074019 | 3.999676 | ENSG000001MCL1/SEC/GO_MF  |

|           |    |         |           |          |          |          |            |           |       |
|-----------|----|---------|-----------|----------|----------|----------|------------|-----------|-------|
| GO:001666 | 9  | 9/1121  | 62/19728  | 0.008022 | 0.085382 | 2.554632 | ENSG000001 | IFI30/SR  | GO_MF |
| GO:000460 | 5  | 5/1121  | 24/19728  | 0.010096 | 0.104955 | 3.666369 | ENSG000001 | MGST3/AL  | GO_MF |
| GO:005108 | 13 | 13/1121 | 112/19728 | 0.011035 | 0.112106 | 2.042691 | ENSG000001 | AHSA1/CAI | GO_MF |
| GO:002288 | 5  | 5/1121  | 25/19728  | 0.012042 | 0.11962  | 3.519715 | ENSG000001 | MCL1/SEC  | GO_MF |
| GO:004748 | 14 | 14/1121 | 129/19728 | 0.014947 | 0.139197 | 1.909923 | ENSG000001 | SDCBP/CAI | GO_MF |
| GO:001667 | 3  | 3/1121  | 10/19728  | 0.016248 | 0.145301 | 5.279572 | ENSG000001 | UQCR10/U  | GO_MF |
| GO:014010 | 5  | 5/1121  | 28/19728  | 0.019362 | 0.168058 | 3.142602 | ENSG000001 | B3GALT6/I | GO_MF |
| GO:001672 | 4  | 4/1121  | 19/19728  | 0.020259 | 0.172494 | 3.704963 | ENSG000001 | FTL/FTH1  | GO_MF |
| GO:005107 | 20 | 20/1121 | 215/19728 | 0.020902 | 0.173225 | 1.637077 | ENSG000001 | TWF2/AIF  | GO_MF |
| GO:001668 | 8  | 8/1121  | 61/19728  | 0.021532 | 0.173225 | 2.30801  | ENSG000001 | MGST3/AL  | GO_MF |
| GO:003107 | 15 | 15/1121 | 149/19728 | 0.022512 | 0.175003 | 1.771668 | ENSG000001 | HSPA6/IT  | GO_MF |
| GO:009855 | 7  | 7/1121  | 52/19728  | 0.026903 | 0.202113 | 2.369039 | ENSG000001 | RXRB/NA   | GO_MF |
| GO:000552 | 3  | 3/1121  | 12/19728  | 0.027364 | 0.202176 | 4.399643 | ENSG000001 | DBN1/CTT  | GO_MF |
| GO:003818 | 4  | 4/1121  | 21/19728  | 0.0286   | 0.209578 | 3.352109 | ENSG000001 | TLR2/FCN  | GO_MF |
| GO:005510 | 4  | 4/1121  | 22/19728  | 0.033429 | 0.237183 | 3.19974  | ENSG000001 | RPL11/RPI | GO_MF |
| GO:001674 | 25 | 25/1121 | 300/19728 | 0.035983 | 0.249372 | 1.466548 | ENSG000001 | WDR5/SAT  | GO_MF |
| GO:190150 | 6  | 6/1121  | 47/19728  | 0.048876 | 0.32367  | 2.246626 | ENSG000001 | SLC25A5/I | GO_MF |
| GO:000370 | 7  | 7/1121  | 61/19728  | 0.056866 | 0.360139 | 2.019508 | ENSG000001 | RXRB/NA   | GO_MF |
| GO:001684 | 3  | 3/1121  | 16/19728  | 0.058878 | 0.360529 | 3.299732 | ENSG000001 | MGST3/AL  | GO_MF |
| GO:000847 | 3  | 3/1121  | 17/19728  | 0.068578 | 0.400711 | 3.10563  | ENSG000001 | ABHD17A/I | GO_MF |
| GO:009859 | 3  | 3/1121  | 17/19728  | 0.068578 | 0.400711 | 3.10563  | ENSG000001 | ABHD17A/I | GO_MF |
| GO:004830 | 7  | 7/1121  | 64/19728  | 0.070159 | 0.407289 | 1.924844 | ENSG000001 | S100A6/C  | GO_MF |
| GO:009760 | 3  | 3/1121  | 18/19728  | 0.078948 | 0.435674 | 2.933095 | ENSG000001 | SKP1/DDB  | GO_MF |
| GO:001970 | 4  | 4/1121  | 30/19728  | 0.087957 | 0.474146 | 2.346476 | ENSG000001 | ZDHHC7/ZI | GO_MF |
| GO:004454 | 3  | 3/1121  | 20/19728  | 0.101553 | 0.523842 | 2.639786 | ENSG000001 | S100A6/S  | GO_MF |
| GO:000371 | 26 | 26/1121 | 352/19728 | 0.103742 | 0.523842 | 1.299895 | ENSG000001 | ABT1/JUNI | GO_MF |
| GO:000553 | 8  | 8/1121  | 84/19728  | 0.104104 | 0.523842 | 1.676055 | ENSG000001 | MMP9/DDR  | GO_MF |
| GO:000554 | 2  | 2/1121  | 10/19728  | 0.107229 | 0.523842 | 3.519715 | ENSG000001 | FKBP2/NA  | GO_MF |
| GO:003172 | 2  | 2/1121  | 10/19728  | 0.107229 | 0.523842 | 3.519715 | ENSG000001 | HBD/HBB   | GO_MF |
| GO:007172 | 2  | 2/1121  | 10/19728  | 0.107229 | 0.523842 | 3.519715 | ENSG000001 | TLR2/CD11 | GO_MF |
| GO:002280 | 29 | 29/1121 | 401/19728 | 0.10906  | 0.529891 | 1.272715 | ENSG000001 | TAP2/NA   | GO_MF |
| GO:001593 | 5  | 5/1121  | 45/19728  | 0.110415 | 0.533572 | 1.955397 | ENSG000001 | SLC25A5/I | GO_MF |
| GO:000517 | 12 | 12/1121 | 144/19728 | 0.118348 | 0.558231 | 1.466548 | ENSG000001 | ISG15/IT  | GO_MF |
| GO:000469 | 2  | 2/1121  | 11/19728  | 0.1263   | 0.558231 | 3.19974  | ENSG000001 | PRKACA/N  | GO_MF |
| GO:004302 | 13 | 13/1121 | 161/19728 | 0.127978 | 0.560847 | 1.421003 | ENSG000001 | PIM1/EIF  | GO_MF |
| GO:000372 | 19 | 19/1121 | 257/19728 | 0.145711 | 0.623278 | 1.301062 | ENSG000001 | JUNB/DRAI | GO_MF |
| GO:003149 | 8  | 8/1121  | 92/19728  | 0.151748 | 0.646012 | 1.530311 | ENSG000001 | ZNHIT1/HI | GO_MF |
| GO:000390 | 2  | 2/1121  | 13/19728  | 0.166448 | 0.678121 | 2.707473 | ENSG000001 | HMGAI/API | GO_MF |
| GO:001999 | 2  | 2/1121  | 13/19728  | 0.166448 | 0.678121 | 2.707473 | ENSG000001 | CDIPT/RA  | GO_MF |
| GO:000155 | 4  | 4/1121  | 38/19728  | 0.167634 | 0.678121 | 1.852481 | ENSG000001 | PSMB4/TLI | GO_MF |
| GO:004317 | 16 | 16/1121 | 217/19728 | 0.173119 | 0.697155 | 1.297591 | ENSG000001 | S100A8/P  | GO_MF |
| GO:004297 | 2  | 2/1121  | 14/19728  | 0.187254 | 0.725043 | 2.514082 | ENSG000001 | RALBP1/SI | GO_MF |
| GO:000190 | 3  | 3/1121  | 28/19728  | 0.211019 | 0.76377  | 1.885561 | ENSG000001 | RGS2/RGS  | GO_MF |
| GO:004362 | 5  | 5/1121  | 59/19728  | 0.24324  | 0.842854 | 1.491404 | ENSG000001 | ADAM8/MYI | GO_MF |
| GO:000555 | 2  | 2/1121  | 17/19728  | 0.251236 | 0.852151 | 2.07042  | ENSG000001 | LBR/TMEM  | GO_MF |
| GO:004803 | 2  | 2/1121  | 17/19728  | 0.251236 | 0.852151 | 2.07042  | ENSG000001 | MT-ND4/A  | GO_MF |
| GO:000548 | 3  | 3/1121  | 31/19728  | 0.257057 | 0.863945 | 1.703088 | ENSG000001 | STX4/STX  | GO_MF |
| GO:004354 | 3  | 3/1121  | 31/19728  | 0.257057 | 0.863945 | 1.703088 | ENSG000001 | IRS2/CAL  | GO_MF |
| GO:002003 | 11 | 11/1121 | 154/19728 | 0.260003 | 0.870573 | 1.257041 | ENSG000001 | SDHC/CYP  | GO_MF |
| GO:001927 | 4  | 4/1121  | 46/19728  | 0.264329 | 0.881753 | 1.530311 | ENSG000001 | YDJC/SIN  | GO_MF |
| GO:004802 | 6  | 6/1121  | 77/19728  | 0.272537 | 0.883545 | 1.371317 | ENSG000001 | TALD01/CI | GO_MF |
| GO:000184 | 2  | 2/1121  | 18/19728  | 0.272772 | 0.883545 | 1.955397 | ENSG000001 | ITGB2/CAI | GO_MF |
| GO:007000 | 2  | 2/1121  | 18/19728  | 0.272772 | 0.883545 | 1.955397 | ENSG000001 | PFN1/RAB  | GO_MF |
| GO:003054 | 4  | 4/1121  | 47/19728  | 0.27713  | 0.891204 | 1.497751 | ENSG000001 | LY6E/NA   | GO_MF |

|           |    |         |           |          |          |          |                          |
|-----------|----|---------|-----------|----------|----------|----------|--------------------------|
| GO:001502 | 4  | 4/1121  | 49/19728  | 0.303007 | 0.95863  | 1.436618 | ENSG000001LILRA4/N/GO_MF |
| GO:000182 | 3  | 3/1121  | 34/19728  | 0.304263 | 0.95863  | 1.552815 | ENSG000001ITGB2/CAIGO_MF |
| GO:009862 | 4  | 4/1121  | 50/19728  | 0.316046 | 0.977664 | 1.407886 | ENSG000001S100A11/IGO_MF |
| GO:004690 | 11 | 11/1121 | 164/19728 | 0.329538 | 0.990918 | 1.180392 | ENSG000001SDHC/CYP2GO_MF |
| GO:001560 | 3  | 3/1121  | 36/19728  | 0.335958 | 0.990918 | 1.466548 | ENSG000001SLC25A5/'GO_MF |
| GO:001672 | 2  | 2/1121  | 21/19728  | 0.336956 | 0.990918 | 1.676055 | ENSG000001QPCT/EPB2GO_MF |
| GO:005180 | 2  | 2/1121  | 21/19728  | 0.336956 | 0.990918 | 1.676055 | ENSG000001PSAP/MANIGO_MF |
| GO:009960 | 2  | 2/1121  | 21/19728  | 0.336956 | 0.990918 | 1.676055 | ENSG000001LY6E/NA GO_MF  |
| GO:003072 | 2  | 2/1121  | 22/19728  | 0.358013 |          | 1.59987  | ENSG000001RAB5B/HP2GO_MF |
| GO:006058 | 24 | 24/1121 | 390/19728 | 0.372849 |          | 1.082989 | ENSG000001RGS2/CDC2GO_MF |
| GO:004662 | 2  | 2/1121  | 23/19728  | 0.37882  |          | 1.530311 | ENSG000001PSAP/S1PIGO_MF |
| GO:005118 | 2  | 2/1121  | 23/19728  | 0.37882  |          | 1.530311 | ENSG000001SLC48A1/'GO_MF |
| GO:000012 | 8  | 8/1121  | 121/19728 | 0.382072 |          | 1.163542 | ENSG000001GABARAPL2GO_MF |
| GO:014010 | 10 | 10/1121 | 158/19728 | 0.409526 |          | 1.113834 | ENSG000001TSEN34/N/GO_MF |
| GO:001920 | 14 | 14/1121 | 227/19728 | 0.415361 |          | 1.085375 | ENSG000001CDKN2D/C/GO_MF |
| GO:199082 | 4  | 4/1121  | 58/19728  | 0.420678 |          | 1.213695 | ENSG000001NFE2L1/Z/GO_MF |
| GO:004432 | 8  | 8/1121  | 127/19728 | 0.434501 |          | 1.108572 | ENSG000001CALM3/SR GO_MF |
| GO:000379 | 1  | 1/1121  | 10/19728  | 0.442977 |          | 1.759857 | ENSG000001LYZ GO_MF      |
| GO:004529 | 1  | 1/1121  | 10/19728  | 0.442977 |          | 1.759857 | ENSG000001JUP GO_MF      |
| GO:000372 | 3  | 3/1121  | 43/19728  | 0.445041 |          | 1.227807 | ENSG000001PPIF/FKBIGO_MF |
| GO:000402 | 1  | 1/1121  | 11/19728  | 0.474644 |          | 1.59987  | ENSG000001ADCY7 GO_MF    |
| GO:003240 | 1  | 1/1121  | 11/19728  | 0.474644 |          | 1.59987  | ENSG000001PCNA GO_MF     |
| GO:004329 | 1  | 1/1121  | 11/19728  | 0.474644 |          | 1.59987  | ENSG000001PTGES2 GO_MF   |
| GO:004350 | 1  | 1/1121  | 11/19728  | 0.474644 |          | 1.59987  | ENSG000001PRKCD GO_MF    |
| GO:001662 | 2  | 2/1121  | 29/19728  | 0.496542 |          | 1.213695 | ENSG000001PYCR2/AA'GO_MF |
| GO:001682 | 3  | 3/1121  | 47/19728  | 0.504193 |          | 1.123313 | ENSG000001PPIF/FKBIGO_MF |
| GO:000552 | 1  | 1/1121  | 12/19728  | 0.504513 |          | 1.466548 | ENSG000001FOLR3 GO_MF    |
| GO:001522 | 1  | 1/1121  | 12/19728  | 0.504513 |          | 1.466548 | ENSG000001SLC6A8 GO_MF   |
| GO:003152 | 1  | 1/1121  | 12/19728  | 0.504513 |          | 1.466548 | ENSG000001P4HB GO_MF     |
| GO:003369 | 1  | 1/1121  | 12/19728  | 0.504513 |          | 1.466548 | ENSG000001FCN1 GO_MF     |
| GO:003352 | 2  | 2/1121  | 30/19728  | 0.514757 |          | 1.173238 | ENSG000001SIN3B/MT/GO_MF |
| GO:000542 | 6  | 6/1121  | 101/19728 | 0.515474 |          | 1.04546  | ENSG000001TSPO/CD8 GO_MF |
| GO:004342 | 1  | 1/1121  | 13/19728  | 0.532685 |          | 1.353736 | ENSG000001SLC4A1 GO_MF   |
| GO:005122 | 5  | 5/1121  | 85/19728  | 0.533894 |          | 1.03521  | ENSG000001SH3BP2/F(GO_MF |
| GO:001672 | 17 | 17/1121 | 299/19728 | 0.53481  |          | 1.000588 | ENSG000001SDF2/DPM/GO_MF |
| GO:005192 | 2  | 2/1121  | 32/19728  | 0.549851 |          | 1.099911 | ENSG000001RILP/NA GO_MF  |
| GO:003142 | 7  | 7/1121  | 123/19728 | 0.55346  |          | 1.001545 | ENSG000001KDM6B/WBIGO_MF |
| GO:000532 | 1  | 1/1121  | 14/19728  | 0.559257 |          | 1.257041 | ENSG000001SLC25A22 GO_MF |
| GO:001682 | 1  | 1/1121  | 14/19728  | 0.559257 |          | 1.257041 | ENSG000001APMAP GO_MF    |
| GO:001910 | 1  | 1/1121  | 14/19728  | 0.559257 |          | 1.257041 | ENSG000001PCNA GO_MF     |
| GO:009700 | 1  | 1/1121  | 14/19728  | 0.559257 |          | 1.257041 | ENSG000001PSAP GO_MF     |
| GO:001680 | 3  | 3/1121  | 51/19728  | 0.559916 |          | 1.03521  | ENSG000001PTGES2/P2GO_MF |
| GO:001922 | 2  | 2/1121  | 33/19728  | 0.566715 |          | 1.06658  | ENSG000001AMPD2/ZBIGO_MF |
| GO:001992 | 8  | 8/1121  | 143/19728 | 0.569527 |          | 0.984536 | ENSG000001IL13RA1/'GO_MF |
| GO:003400 | 2  | 2/1121  | 34/19728  | 0.583118 |          | 1.03521  | ENSG000001POLE4/CHIGO_MF |
| GO:001652 | 1  | 1/1121  | 15/19728  | 0.584319 |          | 1.173238 | ENSG000001ALAS2 GO_MF    |
| GO:005102 | 3  | 3/1121  | 53/19728  | 0.586315 |          | 0.996146 | ENSG000001PRKAR1A/IGO_MF |
| GO:001672 | 4  | 4/1121  | 72/19728  | 0.590627 |          | 0.977698 | ENSG000001SULT1A1/'GO_MF |
| GO:000372 | 1  | 1/1121  | 16/19728  | 0.607957 |          | 1.099911 | ENSG000001P4HB GO_MF     |
| GO:007232 | 1  | 1/1121  | 16/19728  | 0.607957 |          | 1.099911 | ENSG000001SLC6A8 GO_MF   |
| GO:001682 | 3  | 3/1121  | 56/19728  | 0.623962 |          | 0.942781 | ENSG000001ODC1/ALD(GO_MF |
| GO:001982 | 2  | 2/1121  | 37/19728  | 0.629549 |          | 0.951274 | ENSG000001HBD/HBB GO_MF  |
| GO:000090 | 1  | 1/1121  | 17/19728  | 0.630252 |          | 1.03521  | ENSG000001PURA GO_MF     |
| GO:001922 | 1  | 1/1121  | 17/19728  | 0.630252 |          | 1.03521  | ENSG000001VIM GO_MF      |

|           |            |          |          |            |                          |
|-----------|------------|----------|----------|------------|--------------------------|
| GO:000508 | 8 8/1121   | 151/1972 | 0.631403 | 1 0.932375 | ENSG000001TRAPPC5/IGO_MF |
| GO:005127 | 5 5/1121   | 95/19728 | 0.633494 | 1 0.926241 | ENSG000001KDM6B/ALIGO_MF |
| GO:006114 | 13 13/1121 | 247/1972 | 0.652114 | 1 0.926241 | ENSG000001CSTB/BST/GO_MF |
| GO:000188 | 22 22/1121 | 415/1972 | 0.663228 | 1 0.932936 | ENSG000001EEF1A1/TIGO_MF |
| GO:001523 | 5 5/1121   | 99/19728 | 0.669468 | 1 0.888817 | ENSG000001SLC25A5/1GO_MF |
| GO:004239 | 11 11/1121 | 215/1972 | 0.682889 | 1 0.900392 | ENSG000001WDR5/PYG/GO_MF |
| GO:009910 | 6 6/1121   | 120/1972 | 0.683443 | 1 0.879929 | ENSG000001SRI/GNB2/GO_MF |
| GO:000508 | 1 1/1121   | 20/19728 | 0.68982  | 1 0.879929 | ENSG000001SEC61B GO_MF   |
| GO:001624 | 1 1/1121   | 20/19728 | 0.68982  | 1 0.879929 | ENSG000001TAF10 GO_MF    |
| GO:001650 | 1 1/1121   | 20/19728 | 0.68982  | 1 0.879929 | ENSG000001ADIPOR1 GO_MF  |
| GO:001684 | 1 1/1121   | 20/19728 | 0.68982  | 1 0.879929 | ENSG000001DHRS9 GO_MF    |
| GO:003168 | 1 1/1121   | 20/19728 | 0.68982  | 1 0.879929 | ENSG000001GNAI2 GO_MF    |
| GO:001514 | 2 2/1121   | 42/19728 | 0.697811 | 1 0.838027 | ENSG000001AQP3/SLC/GO_MF |
| GO:000472 | 10 10/1121 | 199/1972 | 0.700051 | 1 0.88435  | ENSG000001CTDSP2/DIGO_MF |
| GO:001663 | 1 1/1121   | 21/19728 | 0.707463 | 1 0.838027 | ENSG000001AOC3 GO_MF     |
| GO:007084 | 1 1/1121   | 21/19728 | 0.707463 | 1 0.838027 | ENSG000001SNCA GO_MF     |
| GO:000163 | 8 8/1121   | 162/1972 | 0.707824 | 1 0.869065 | ENSG000001FPR2/AGTIGO_MF |
| GO:005153 | 3 3/1121   | 64/19728 | 0.712472 | 1 0.824933 | ENSG000001ISCU/RSAIGO_MF |
| GO:000802 | 10 10/1121 | 202/1972 | 0.717485 | 1 0.871216 | ENSG000001DYNLT1/M/GO_MF |
| GO:001603 | 1 1/1121   | 22/19728 | 0.724104 | 1 0.799935 | ENSG000001PPIF GO_MF     |
| GO:000803 | 4 4/1121   | 87/19728 | 0.735722 | 1 0.80913  | ENSG000001KDM6B/SKIGO_MF |
| GO:000514 | 1 1/1121   | 23/19728 | 0.739798 | 1 0.765155 | ENSG000001IRS2 GO_MF     |
| GO:001684 | 1 1/1121   | 23/19728 | 0.739798 | 1 0.765155 | ENSG000001ADCY7 GO_MF    |
| GO:003279 | 1 1/1121   | 23/19728 | 0.739798 | 1 0.765155 | ENSG000001RGS14 GO_MF    |
| GO:014010 | 1 1/1121   | 23/19728 | 0.739798 | 1 0.765155 | ENSG000001TRMT112 GO_MF  |
| GO:003067 | 9 9/1121   | 187/1972 | 0.741839 | 1 0.84699  | ENSG000001SDCBP/LA/GO_MF |
| GO:004317 | 4 4/1121   | 88/19728 | 0.743847 | 1 0.799935 | ENSG000001CDIPT/TSIGO_MF |
| GO:004302 | 2 2/1121   | 46/19728 | 0.744622 | 1 0.765155 | ENSG000001SNCA/CASIGO_MF |
| GO:001983 | 7 7/1121   | 149/1972 | 0.749007 | 1 0.826779 | ENSG000001DUSP1/IL/GO_MF |
| GO:003014 | 1 1/1121   | 25/19728 | 0.768562 | 1 0.703943 | ENSG000001RGS14 GO_MF    |
| GO:003123 | 1 1/1121   | 26/19728 | 0.78173  | 1 0.676868 | ENSG000001CHMP2A GO_MF   |
| GO:004550 | 1 1/1121   | 26/19728 | 0.78173  | 1 0.676868 | ENSG000001GLUL GO_MF     |
| GO:000532 | 1 1/1121   | 27/19728 | 0.794149 | 1 0.651799 | ENSG000001SLC6A8 GO_MF   |
| GO:003244 | 1 1/1121   | 27/19728 | 0.794149 | 1 0.651799 | ENSG000001KDM6B GO_MF    |
| GO:000827 | 4 4/1121   | 95/19728 | 0.795444 | 1 0.740993 | ENSG000001TRMT112/1GO_MF |
| GO:001683 | 6 6/1121   | 138/1972 | 0.802806 | 1 0.765155 | ENSG000001SIN3B/AMIGO_MF |
| GO:001683 | 3 3/1121   | 75/19728 | 0.806739 | 1 0.703943 | ENSG000001APEX2/FH/GO_MF |
| GO:001686 | 1 1/1121   | 29/19728 | 0.816909 | 1 0.606847 | ENSG000001TRUB1 GO_MF    |
| GO:004323 | 1 1/1121   | 30/19728 | 0.827328 | 1 0.586619 | ENSG000001LGALS3 GO_MF   |
| GO:004550 | 1 1/1121   | 30/19728 | 0.827328 | 1 0.586619 | ENSG000001BAG3 GO_MF     |
| GO:000203 | 3 3/1121   | 79/19728 | 0.833891 | 1 0.6683   | ENSG000001BCL2L12/1GO_MF |
| GO:014003 | 7 7/1121   | 165/1972 | 0.834295 | 1 0.746606 | ENSG000001WDR5/ING/GO_MF |
| GO:001670 | 1 1/1121   | 31/19728 | 0.837155 | 1 0.567696 | ENSG000001PTGS2 GO_MF    |
| GO:003033 | 1 1/1121   | 31/19728 | 0.837155 | 1 0.567696 | ENSG000001CDKN1A GO_MF   |
| GO:003294 | 1 1/1121   | 31/19728 | 0.837155 | 1 0.567696 | ENSG000001RGS14 GO_MF    |
| GO:007027 | 2 2/1121   | 58/19728 | 0.84937  | 1 0.606847 | ENSG000001MARC1/AL/GO_MF |
| GO:001978 | 21 21/1121 | 449/1972 | 0.850213 | 1 0.823096 | ENSG000001IRF2BPL/GO_MF  |
| GO:003559 | 3 3/1121   | 82/19728 | 0.852039 | 1 0.64385  | ENSG000001LASP1/SH/GO_MF |
| GO:003136 | 1 1/1121   | 33/19728 | 0.855164 | 1 0.53329  | ENSG000001HHEX GO_MF     |
| GO:001717 | 9 9/1121   | 212/1972 | 0.856946 | 1 0.747109 | ENSG000001MMP9/CFD/GO_MF |
| GO:001662 | 2 2/1121   | 60/19728 | 0.862445 | 1 0.586619 | ENSG000001SDHC/LBR GO_MF |
| GO:003027 | 2 2/1121   | 60/19728 | 0.862445 | 1 0.586619 | ENSG000001BIN1/HGN/GO_MF |
| GO:001708 | 1 1/1121   | 34/19728 | 0.863407 | 1 0.517605 | ENSG000001FXD5 GO_MF     |
| GO:000453 | 2 2/1121   | 61/19728 | 0.868585 | 1 0.577002 | ENSG000001APEX2/MU/GO_MF |



|           |            |           |          |            |                  |                 |
|-----------|------------|-----------|----------|------------|------------------|-----------------|
| GO:003218 | 4 4/1121   | 109/19728 | 0.873412 | 1 0.645819 | ENSG000001000000 | TOLLIP/FIGO_MF  |
| GO:009711 | 2 2/1121   | 63/19728  | 0.880115 | 1 0.558685 | ENSG000001000000 | VIM/CDC37/GO_MF |
| GO:007181 | 1 1/1121   | 37/19728  | 0.885431 | 1 0.475637 | ENSG000001000000 | APOL2 GO_MF     |
| GO:001670 | 2 2/1121   | 65/19728  | 0.890704 | 1 0.541495 | ENSG000001000000 | MGST3/AL/GO_MF  |
| GO:001624 | 1 1/1121   | 38/19728  | 0.891953 | 1 0.46312  | ENSG000001000000 | ENSA GO_MF      |
| GO:001714 | 1 1/1121   | 38/19728  | 0.891953 | 1 0.46312  | ENSG000001000000 | FZD2 GO_MF      |
| GO:009048 | 1 1/1121   | 38/19728  | 0.891953 | 1 0.46312  | ENSG000001000000 | SLC2A1 GO_MF    |
| GO:004339 | 1 1/1121   | 39/19728  | 0.898105 | 1 0.451245 | ENSG000001000000 | SDCBP GO_MF     |
| GO:001622 | 1 1/1121   | 42/19728  | 0.914538 | 1 0.419014 | ENSG000001000000 | DHRS9 GO_MF     |
| GO:010100 | 4 4/1121   | 120/19728 | 0.915251 | 1 0.586619 | ENSG000001000000 | ZC3H12A/1/GO_MF |
| GO:001690 | 1 1/1121   | 44/19728  | 0.923994 | 1 0.399968 | ENSG000001000000 | PDHB GO_MF      |
| GO:190168 | 1 1/1121   | 44/19728  | 0.923994 | 1 0.399968 | ENSG000001000000 | SLC35B2 GO_MF   |
| GO:001687 | 1 1/1121   | 47/19728  | 0.936255 | 1 0.374438 | ENSG000001000000 | GLUL GO_MF      |
| GO:000534 | 5 5/1121   | 156/19728 | 0.945981 | 1 0.564057 | ENSG000001000000 | SLC16A5/1/GO_MF |
| GO:004633 | 2 2/1121   | 83/19728  | 0.953602 | 1 0.424062 | ENSG000001000000 | PURA/RGC/GO_MF  |
| GO:000554 | 1 1/1121   | 54/19728  | 0.95772  | 1 0.325899 | ENSG000001000000 | PRELID1 GO_MF   |
| GO:001984 | 4 4/1121   | 145/19728 | 0.968056 | 1 0.485478 | ENSG000001000000 | FOLR3/MA/GO_MF  |
| GO:000178 | 1 1/1121   | 61/19728  | 0.971961 | 1 0.288501 | ENSG000001000000 | MFGE8 GO_MF     |
| GO:001661 | 4 4/1121   | 149/19728 | 0.972864 | 1 0.472445 | ENSG000001000000 | DHRS9/HM/GO_MF  |
| GO:000817 | 1 1/1121   | 69/19728  | 0.982469 | 1 0.255052 | ENSG000001000000 | TRMT112 GO_MF   |
| GO:000554 | 15 15/1121 | 443/19728 | 0.990884 | 1 0.595888 | ENSG000001000000 | SDCBP/TW/GO_MF  |
| GO:002280 | 17 17/1121 | 496/19728 | 0.992729 | 1 0.603177 | ENSG000001000000 | PANX2/AQ/GO_MF  |
| GO:003059 | 2 2/1121   | 129/19728 | 0.995458 | 1 0.272846 | ENSG000001000000 | TSPO/GAB/GO_MF  |
| GO:000820 | 4 4/1121   | 193/19728 | 0.99591  | 1 0.364737 | ENSG000001000000 | AAMP/HDG/GO_MF  |
| GO:000553 | 6 6/1121   | 252/19728 | 0.996463 | 1 0.419014 | ENSG000001000000 | AAMP/HDG/GO_MF  |
| GO:001670 | 3 3/1121   | 176/19728 | 0.997791 | 1 0.299976 | ENSG000001000000 | CYP4F3/P/GO_MF  |
| GO:001674 | 5 5/1121   | 240/19728 | 0.998174 | 1 0.366637 | ENSG000001000000 | TRMT112/1/GO_MF |
| GO:000449 | 1 1/1121   | 114/19728 | 0.998755 | 1 0.154373 | ENSG000001000000 | CYP4F3 GO_MF    |
| GO:000551 | 3 3/1121   | 212/19728 | 0.999628 | 1 0.249036 | ENSG000001000000 | EEF1A1/R/GO_MF  |
| GO:005060 | 6 6/1121   | 310/19728 | 0.999698 | 1 0.340618 | ENSG000001000000 | LBR/CYB5/GO_MF  |
