# Supplementary material for: Genomic Expression Profiling and Bioinformatics Analysis of Chronic Recurrent Multifocal Osteomyelitis
Source: Hindawi journal article supplement (doi:10.1155/2021/6898093), 2021-01-01
Supplement: f8 [file 6898093.f8.pdf]

| Pathway ID and Terms                                     | Counts | GeneRatio | BgRatio  | pValue   |
|----------------------------------------------------------|--------|-----------|----------|----------|
| hsa00190~Oxidative phosphorylation                       | 31     | 31/496    | 133/8037 | 6.50E-11 |
| hsa03010~Ribosome                                        | 33     | 33/496    | 158/8037 | 3.50E-10 |
| hsa05012~Parkinson disease                               | 43     | 43/496    | 247/8037 | 3.51E-10 |
| hsa04932~Non-alcoholic fatty liver disease (NAFLD)       | 28     | 28/496    | 149/8037 | 8.79E-08 |
| hsa05010~Alzheimer disease                               | 45     | 45/496    | 334/8037 | 4.47E-07 |
| hsa04145~Phagosome                                       | 27     | 27/496    | 152/8037 | 4.92E-07 |
| hsa05016~Huntington disease                              | 39     | 39/496    | 271/8037 | 5.02E-07 |
| hsa04714~Thermogenesis                                   | 34     | 34/496    | 231/8037 | 1.65E-06 |
| hsa05140~Leishmaniasis                                   | 17     | 17/496    | 77/8037  | 3.20E-06 |
| hsa04612~Antigen processing and presentation             | 15     | 15/496    | 78/8037  | 6.82E-05 |
| hsa05134~Legionellosis                                   | 12     | 12/496    | 57/8037  | 0.000147 |
| hsa00510~N-Glycan biosynthesis                           | 11     | 11/496    | 50/8037  | 0.000183 |
| hsa05169~Epstein-Barr virus infection                    | 26     | 26/496    | 201/8037 | 0.00025  |
| hsa04723~Retrograde endocannabinoid signaling            | 21     | 21/496    | 148/8037 | 0.000276 |
| hsa05132~Salmonella infection                            | 26     | 26/496    | 214/8037 | 0.000667 |
| hsa05152~Tuberculosis                                    | 23     | 23/496    | 180/8037 | 0.000669 |
| hsa04141~Protein processing in endoplasmic reticulum     | 21     | 21/496    | 167/8037 | 0.001389 |
| hsa05166~Human T-cell leukemia virus 1 infection         | 25     | 25/496    | 219/8037 | 0.002047 |
| hsa03060~Protein export                                  | 6      | 6/496     | 23/8037  | 0.002193 |
| hsa05144~Malaria                                         | 9      | 9/496     | 50/8037  | 0.00312  |
| hsa03040~Spliceosome                                     | 18     | 18/496    | 149/8037 | 0.004593 |
| hsa05150~Staphylococcus aureus infection                 | 13     | 13/496    | 96/8037  | 0.005833 |
| hsa05145~Toxoplasmosis                                   | 14     | 14/496    | 112/8037 | 0.008751 |
| hsa05162~Measles                                         | 16     | 16/496    | 138/8037 | 0.010723 |
| hsa05110~Vibrio cholerae infection                       | 8      | 8/496     | 50/8037  | 0.010759 |
| hsa05323~Rheumatoid arthritis                            | 12     | 12/496    | 93/8037  | 0.011518 |
| hsa04662~B cell receptor signaling pathway               | 11     | 11/496    | 82/8037  | 0.011542 |
| hsa04216~Ferroptosis                                     | 7      | 7/496     | 41/8037  | 0.011772 |
| hsa04380~Osteoclast differentiation                      | 15     | 15/496    | 128/8037 | 0.012076 |
| hsa04213~Longevity regulating pathway - multiple species | 9      | 9/496     | 62/8037  | 0.013136 |
| hsa04260~Cardiac muscle contraction                      | 11     | 11/496    | 87/8037  | 0.017528 |
| hsa05131~Shigellosis                                     | 23     | 23/496    | 236/8037 | 0.019394 |
| hsa04210~Apoptosis                                       | 15     | 15/496    | 136/8037 | 0.020157 |
| hsa00920~Sulfur metabolism                               | 3      | 3/496     | 10/8037  | 0.020232 |
| hsa05216~Thyroid cancer                                  | 6      | 6/496     | 37/8037  | 0.024333 |
| hsa05330~Allograft rejection                             | 6      | 6/496     | 38/8037  | 0.027442 |
| hsa04666~Fc gamma R-mediated phagocytosis                | 11     | 11/496    | 93/8037  | 0.027455 |
| hsa04657~IL-17 signaling pathway                         | 11     | 11/496    | 94/8037  | 0.029438 |
| hsa05416~Viral myocarditis                               | 8      | 8/496     | 60/8037  | 0.030044 |
| hsa00513~Various types of N-glycan biosynthesis          | 6      | 6/496     | 39/8037  | 0.030803 |
| hsa04068~FoxO signaling pathway                          | 14     | 14/496    | 131/8037 | 0.030836 |
| hsa05164~Influenza A                                     | 17     | 17/496    | 170/8037 | 0.032917 |
| hsa04217~Necroptosis                                     | 16     | 16/496    | 159/8037 | 0.035927 |
| hsa05163~Human cytomegalovirus infection                 | 21     | 21/496    | 225/8037 | 0.03735  |
| hsa05170~Human immunodeficiency virus 1 infection        | 20     | 20/496    | 212/8037 | 0.037707 |
| hsa05210~Colorectal cancer                               | 10     | 10/496    | 86/8037  | 0.038273 |
| hsa05332~Graft-versus-host disease                       | 6      | 6/496     | 41/8037  | 0.038306 |
| hsa04330~Notch signaling pathway                         | 7      | 7/496     | 53/8037  | 0.042949 |
| hsa05320~Autoimmune thyroid disease                      | 7      | 7/496     | 53/8037  | 0.042949 |
| hsa05133~Pertussis                                       | 9      | 9/496     | 76/8037  | 0.043392 |
| hsa04215~Apoptosis - multiple species                    | 5      | 5/496     | 32/8037  | 0.044413 |
| hsa05321~Inflammatory bowel disease (IBD)                | 8      | 8/496     | 65/8037  | 0.045468 |
| hsa04940~Type I diabetes mellitus                        | 6      | 6/496     | 43/8037  | 0.04688  |

|                                                 |           |          |          |
|-------------------------------------------------|-----------|----------|----------|
| hsa04142~Lysosome                               | 13 13/496 | 128/8037 | 0.051742 |
| hsa04144~Endocytosis                            | 22 22/496 | 248/8037 | 0.053922 |
| hsa03050~Proteasome                             | 6 6/496   | 45/8037  | 0.056555 |
| hsa04920~Adipocytokine signaling pathway        | 8 8/496   | 69/8037  | 0.060998 |
| hsa04659~Th17 cell differentiation              | 11 11/496 | 107/8037 | 0.065128 |
| hsa04672~Intestinal immune network for IgA proc | 6 6/496   | 49/8037  | 0.079249 |
| hsa04966~Collecting duct acid secretion         | 4 4/496   | 27/8037  | 0.081586 |
| hsa04621~NOD-like receptor signaling pathway    | 16 16/496 | 181/8037 | 0.092611 |
| hsa04064~NF-kappa B signaling pathway           | 10 10/496 | 104/8037 | 0.107429 |
| hsa04625~C-type lectin receptor signaling pathw | 10 10/496 | 104/8037 | 0.107429 |
| hsa00020~Citrate cycle (TCA cycle)              | 4 4/496   | 30/8037  | 0.110528 |
| hsa00030~Pentose phosphate pathway              | 4 4/496   | 30/8037  | 0.110528 |
| hsa03018~RNA degradation                        | 8 8/496   | 79/8037  | 0.112855 |
| hsa05222~Small cell lung cancer                 | 9 9/496   | 92/8037  | 0.113251 |
| hsa05221~Acute myeloid leukemia                 | 7 7/496   | 67/8037  | 0.117624 |
| hsa04928~Parathyroid hormone synthesis, secreti | 10 10/496 | 106/8037 | 0.117897 |
| hsa03020~RNA polymerase                         | 4 4/496   | 31/8037  | 0.121066 |
| hsa05310~Asthma                                 | 4 4/496   | 31/8037  | 0.121066 |
| hsa05161~Hepatitis B                            | 14 14/496 | 162/8037 | 0.126095 |
| hsa04962~Vasopressin-regulated water reabsorpti | 5 5/496   | 44/8037  | 0.132585 |
| hsa04371~Apelin signaling pathway               | 12 12/496 | 137/8037 | 0.138739 |
| hsa04622~RIG-I-like receptor signaling pathway  | 7 7/496   | 70/8037  | 0.139162 |
| hsa04668~TNF signaling pathway                  | 10 10/496 | 112/8037 | 0.152538 |
| hsa04670~Leukocyte transendothelial migration   | 10 10/496 | 113/8037 | 0.158766 |
| hsa01230~Biosynthesis of amino acids            | 7 7/496   | 75/8037  | 0.178913 |
| hsa03030~DNA replication                        | 4 4/496   | 36/8037  | 0.179488 |
| hsa04727~GABAergic synapse                      | 8 8/496   | 89/8037  | 0.182481 |
| hsa05235~PD-L1 expression and PD-1 checkpoint i | 8 8/496   | 89/8037  | 0.182481 |
| hsa01200~Carbon metabolism                      | 10 10/496 | 117/8037 | 0.184889 |
| hsa04218~Cellular senescence                    | 13 13/496 | 160/8037 | 0.188275 |
| hsa04062~Chemokine signaling pathway            | 15 15/496 | 189/8037 | 0.189578 |
| hsa05217~Basal cell carcinoma                   | 6 6/496   | 63/8037  | 0.191406 |
| hsa05205~Proteoglycans in cancer                | 16 16/496 | 205/8037 | 0.19745  |
| hsa04658~Th1 and Th2 cell differentiation       | 8 8/496   | 92/8037  | 0.206365 |
| hsa04140~Autophagy - animal                     | 11 11/496 | 137/8037 | 0.224635 |
| hsa04066~HIF-1 signaling pathway                | 9 9/496   | 109/8037 | 0.229728 |
| hsa04915~Estrogen signaling pathway             | 11 11/496 | 138/8037 | 0.231618 |
| hsa04530~Tight junction                         | 13 13/496 | 169/8037 | 0.243788 |
| hsa04150~mTOR signaling pathway                 | 12 12/496 | 155/8037 | 0.24842  |
| hsa05160~Hepatitis C                            | 12 12/496 | 155/8037 | 0.24842  |
| hsa04923~Regulation of lipolysis in adipocytes  | 5 5/496   | 55/8037  | 0.250613 |
| hsa05167~Kaposi sarcoma-associated herpesvirus  | 14 14/496 | 186/8037 | 0.25801  |
| hsa05202~Transcriptional misregulation in cance | 14 14/496 | 186/8037 | 0.25801  |
| hsa05120~Epithelial cell signaling in Helicobac | 6 6/496   | 70/8037  | 0.262383 |
| hsa05130~Pathogenic Escherichia coli infection  | 15 15/496 | 202/8037 | 0.26485  |
| hsa04010~MAPK signaling pathway                 | 21 21/496 | 294/8037 | 0.272991 |
| hsa00480~Glutathione metabolism                 | 5 5/496   | 57/8037  | 0.274504 |
| hsa05014~Amyotrophic lateral sclerosis (ALS)    | 5 5/496   | 57/8037  | 0.274504 |
| hsa05203~Viral carcinogenesis                   | 15 15/496 | 204/8037 | 0.277312 |
| hsa00630~Glyoxylate and dicarboxylate metabolis | 3 3/496   | 30/8037  | 0.281687 |
| hsa04115~p53 signaling pathway                  | 6 6/496   | 72/8037  | 0.283835 |
| hsa04978~Mineral absorption                     | 5 5/496   | 58/8037  | 0.286624 |
| hsa05213~Endometrial cancer                     | 5 5/496   | 58/8037  | 0.286624 |
| hsa01524~Platinum drug resistance               | 6 6/496   | 73/8037  | 0.294703 |

|                                                              |           |          |          |
|--------------------------------------------------------------|-----------|----------|----------|
| hsa00052~Galactose metabolism                                | 3 3/496   | 31/8037  | 0.298896 |
| hsa04620~Toll-like receptor signaling pathway                | 8 8/496   | 104/8037 | 0.311921 |
| hsa05226~Gastric cancer                                      | 11 11/496 | 149/8037 | 0.313221 |
| hsa04930~Type II diabetes mellitus                           | 4 4/496   | 46/8037  | 0.315331 |
| hsa05135~Yersinia infection                                  | 9 9/496   | 120/8037 | 0.321764 |
| hsa05212~Pancreatic cancer                                   | 6 6/496   | 76/8037  | 0.327756 |
| hsa05220~Chronic myeloid leukemia                            | 6 6/496   | 76/8037  | 0.327756 |
| hsa00600~Sphingolipid metabolism                             | 4 4/496   | 47/8037  | 0.3296   |
| hsa00051~Fructose and mannose metabolism                     | 3 3/496   | 33/8037  | 0.33344  |
| hsa03410~Base excision repair                                | 3 3/496   | 33/8037  | 0.33344  |
| hsa04130~SNARE interactions in vesicular transport           | 3 3/496   | 33/8037  | 0.33344  |
| hsa04623~Cytosolic DNA-sensing pathway                       | 5 5/496   | 63/8037  | 0.348384 |
| hsa00270~Cysteine and methionine metabolism                  | 4 4/496   | 49/8037  | 0.35822  |
| hsa05020~Prion diseases                                      | 3 3/496   | 35/8037  | 0.367913 |
| hsa00500~Starch and sucrose metabolism                       | 3 3/496   | 36/8037  | 0.385042 |
| hsa05223~Non-small cell lung cancer                          | 5 5/496   | 66/8037  | 0.385859 |
| hsa04913~Ovarian steroidogenesis                             | 4 4/496   | 51/8037  | 0.386818 |
| hsa05143~African trypanosomiasis                             | 3 3/496   | 37/8037  | 0.402062 |
| hsa04640~Hematopoietic cell lineage                          | 7 7/496   | 99/8037  | 0.411883 |
| hsa03430~Mismatch repair                                     | 2 2/496   | 23/8037  | 0.419603 |
| hsa04015~Rap1 signaling pathway                              | 14 14/496 | 210/8037 | 0.422226 |
| hsa05224~Breast cancer                                       | 10 10/496 | 147/8037 | 0.422355 |
| hsa05230~Central carbon metabolism in cancer                 | 5 5/496   | 69/8037  | 0.423219 |
| hsa04916~Melanogenesis                                       | 7 7/496   | 101/8037 | 0.432427 |
| hsa00534~Glycosaminoglycan biosynthesis - heparan sulfate    | 2 2/496   | 24/8037  | 0.441211 |
| hsa05142~Chagas disease (American trypanosomiasis)           | 7 7/496   | 102/8037 | 0.442666 |
| hsa05146~Amoebiasis                                          | 7 7/496   | 102/8037 | 0.442666 |
| hsa04071~Sphingolipid signaling pathway                      | 8 8/496   | 119/8037 | 0.454325 |
| hsa04935~Growth hormone synthesis, secretion and action      | 8 8/496   | 119/8037 | 0.454325 |
| hsa04022~cGMP-PKG signaling pathway                          | 11 11/496 | 167/8037 | 0.456748 |
| hsa04540~Gap junction                                        | 6 6/496   | 88/8037  | 0.461909 |
| hsa04014~Ras signaling pathway                               | 15 15/496 | 232/8037 | 0.464661 |
| hsa05225~Hepatocellular carcinoma                            | 11 11/496 | 168/8037 | 0.464758 |
| hsa05219~Bladder cancer                                      | 3 3/496   | 41/8037  | 0.468546 |
| hsa04211~Longevity regulating pathway                        | 6 6/496   | 89/8037  | 0.472915 |
| hsa04950~Maturity onset diabetes of the young                | 2 2/496   | 26/8037  | 0.483048 |
| hsa04918~Thyroid hormone synthesis                           | 5 5/496   | 74/8037  | 0.48439  |
| hsa04934~Cushing syndrome                                    | 10 10/496 | 155/8037 | 0.489692 |
| hsa04910~Insulin signaling pathway                           | 9 9/496   | 139/8037 | 0.490792 |
| hsa05418~Fluid shear stress and atherosclerosis              | 9 9/496   | 139/8037 | 0.490792 |
| hsa05032~Morphine addiction                                  | 6 6/496   | 91/8037  | 0.49473  |
| hsa00062~Fatty acid elongation                               | 2 2/496   | 27/8037  | 0.503229 |
| hsa00130~Ubiquinone and other terpenoid-quinone biosynthesis | 1 1/496   | 11/8037  | 0.503992 |
| hsa04912~GnRH signaling pathway                              | 6 6/496   | 93/8037  | 0.516236 |
| hsa04310~Wnt signaling pathway                               | 10 10/496 | 160/8037 | 0.530859 |
| hsa04926~Relaxin signaling pathway                           | 8 8/496   | 129/8037 | 0.546973 |
| hsa04630~JAK-STAT signaling pathway                          | 10 10/496 | 162/8037 | 0.547017 |
| hsa00590~Arachidonic acid metabolism                         | 4 4/496   | 63/8037  | 0.550716 |
| hsa05168~Herpes simplex virus 1 infection                    | 30 30/496 | 491/8037 | 0.552005 |
| hsa00230~Purine metabolism                                   | 8 8/496   | 130/8037 | 0.555911 |
| hsa03420~Nucleotide excision repair                          | 3 3/496   | 47/8037  | 0.561408 |
| hsa04650~Natural killer cell mediated cytotoxicity           | 8 8/496   | 131/8037 | 0.564776 |
| hsa04072~Phospholipase D signaling pathway                   | 9 9/496   | 148/8037 | 0.567877 |
| hsa04514~Cell adhesion molecules (CAMs)                      | 9 9/496   | 148/8037 | 0.567877 |

|                                                   |           |          |          |
|---------------------------------------------------|-----------|----------|----------|
| hsa00564~Glycerophospholipid metabolism           | 6 6/496   | 98/8037  | 0.568338 |
| hsa04137~Mitophagy - animal                       | 4 4/496   | 65/8037  | 0.575832 |
| hsa00520~Amino sugar and nucleotide sugar metabol | 3 3/496   | 48/8037  | 0.575908 |
| hsa04136~Autophagy - other                        | 2 2/496   | 32/8037  | 0.596175 |
| hsa00330~Arginine and proline metabolism          | 3 3/496   | 50/8037  | 0.603993 |
| hsa04340~Hedgehog signaling pathway               | 3 3/496   | 50/8037  | 0.603993 |
| hsa05322~Systemic lupus erythematosus             | 8 8/496   | 136/8037 | 0.607873 |
| hsa04610~Complement and coagulation cascades      | 5 5/496   | 85/8037  | 0.609218 |
| hsa00010~Glycolysis / Gluconeogenesis             | 4 4/496   | 68/8037  | 0.611969 |
| hsa04921~Oxytocin signaling pathway               | 9 9/496   | 154/8037 | 0.616374 |
| hsa04152~AMPK signaling pathway                   | 7 7/496   | 120/8037 | 0.616554 |
| hsa05211~Renal cell carcinoma                     | 4 4/496   | 69/8037  | 0.623584 |
| hsa04922~Glucagon signaling pathway               | 6 6/496   | 106/8037 | 0.645548 |
| hsa04110~Cell cycle                               | 7 7/496   | 124/8037 | 0.651071 |
| hsa03460~Fanconi anemia pathway                   | 3 3/496   | 54/8037  | 0.656367 |
| hsa04976~Bile secretion                           | 4 4/496   | 72/8037  | 0.657088 |
| hsa00360~Phenylalanine metabolism                 | 1 1/496   | 17/8037  | 0.661771 |
| hsa00450~Selenocompound metabolism                | 1 1/496   | 17/8037  | 0.661771 |
| hsa00910~Nitrogen metabolism                      | 1 1/496   | 17/8037  | 0.661771 |
| hsa05100~Bacterial invasion of epithelial cells   | 4 4/496   | 73/8037  | 0.667799 |
| hsa03013~RNA transport                            | 10 10/496 | 180/8037 | 0.680867 |
| hsa00511~Other glycan degradation                 | 1 1/496   | 18/8037  | 0.682689 |
| hsa01210~2-Oxocarboxylic acid metabolism          | 1 1/496   | 18/8037  | 0.682689 |
| hsa05214~Glioma                                   | 4 4/496   | 75/8037  | 0.688528 |
| hsa05340~Primary immunodeficiency                 | 2 2/496   | 38/8037  | 0.689728 |
| hsa04350~TGF-beta signaling pathway               | 5 5/496   | 94/8037  | 0.697141 |
| hsa04971~Gastric acid secretion                   | 4 4/496   | 76/8037  | 0.698544 |
| hsa00531~Glycosaminoglycan degradation            | 1 1/496   | 19/8037  | 0.702316 |
| hsa00770~Pantothenate and CoA biosynthesis        | 1 1/496   | 19/8037  | 0.702316 |
| hsa00620~Pyruvate metabolism                      | 2 2/496   | 39/8037  | 0.703461 |
| hsa04724~Glutamatergic synapse                    | 6 6/496   | 114/8037 | 0.713826 |
| hsa00260~Glycine, serine and threonine metaboli   | 2 2/496   | 40/8037  | 0.716684 |
| hsa04721~Synaptic vesicle cycle                   | 4 4/496   | 78/8037  | 0.717878 |
| hsa00100~Steroid biosynthesis                     | 1 1/496   | 20/8037  | 0.720731 |
| hsa00532~Glycosaminoglycan biosynthesis - chonc   | 1 1/496   | 20/8037  | 0.720731 |
| hsa04713~Circadian entrainment                    | 5 5/496   | 97/8037  | 0.723219 |
| hsa03440~Homologous recombination                 | 2 2/496   | 41/8037  | 0.72941  |
| hsa01522~Endocrine resistance                     | 5 5/496   | 98/8037  | 0.731546 |
| hsa05231~Choline metabolism in cancer             | 5 5/496   | 98/8037  | 0.731546 |
| hsa00561~Glycerolipid metabolism                  | 3 3/496   | 61/8037  | 0.735625 |
| hsa00220~Arginine biosynthesis                    | 1 1/496   | 21/8037  | 0.738009 |
| hsa04070~Phosphatidylinositol signaling system    | 5 5/496   | 99/8037  | 0.73969  |
| hsa00860~Porphyrin and chlorophyll metabolism     | 2 2/496   | 42/8037  | 0.741647 |
| hsa05165~Human papillomavirus infection           | 18 18/496 | 330/8037 | 0.742768 |
| hsa04120~Ubiquitin mediated proteolysis           | 7 7/496   | 136/8037 | 0.742869 |
| hsa04061~Viral protein interaction with cytohir   | 5 5/496   | 100/8037 | 0.747652 |
| hsa04750~Inflammatory mediator regulation of Tf   | 5 5/496   | 100/8037 | 0.747652 |
| hsa04722~Neurotrophin signaling pathway           | 6 6/496   | 119/8037 | 0.751638 |
| hsa04975~Fat digestion and absorption             | 2 2/496   | 43/8037  | 0.753408 |
| hsa00900~Terpenoid backbone biosynthesis          | 1 1/496   | 22/8037  | 0.75422  |
| hsa04810~Regulation of actin cytoskeleton         | 11 11/496 | 213/8037 | 0.772379 |
| hsa03022~Basal transcription factors              | 2 2/496   | 45/8037  | 0.775551 |
| hsa04012~ErbB signaling pathway                   | 4 4/496   | 85/8037  | 0.77831  |
| hsa04611~Platelet activation                      | 6 6/496   | 124/8037 | 0.785693 |

|                                                   |    |        |          |          |
|---------------------------------------------------|----|--------|----------|----------|
| hsa04024~cAMP signaling pathway                   | 11 | 11/496 | 216/8037 | 0.78758  |
| hsa00830~Retinol metabolism                       | 3  | 3/496  | 67/8037  | 0.791441 |
| hsa00514~Other types of O-glycan biosynthesis     | 2  | 2/496  | 47/8037  | 0.795937 |
| hsa00563~Glycosylphosphatidylinositol (GPI)-anc   | 1  | 1/496  | 25/8037  | 0.797089 |
| hsa04664~Fc epsilon RI signaling pathway          | 3  | 3/496  | 68/8037  | 0.799724 |
| hsa04931~Insulin resistance                       | 5  | 5/496  | 108/8037 | 0.804924 |
| hsa04924~Renin secretion                          | 3  | 3/496  | 69/8037  | 0.80773  |
| hsa05030~Cocaine addiction                        | 2  | 2/496  | 49/8037  | 0.81467  |
| hsa04917~Prolactin signaling pathway              | 3  | 3/496  | 70/8037  | 0.815465 |
| hsa01040~Biosynthesis of unsaturated fatty acid   | 1  | 1/496  | 27/8037  | 0.821436 |
| hsa03015~mRNA surveillance pathway                | 4  | 4/496  | 91/8037  | 0.821554 |
| hsa04970~Salivary secretion                       | 4  | 4/496  | 91/8037  | 0.821554 |
| hsa04520~Adherens junction                        | 3  | 3/496  | 71/8037  | 0.822935 |
| hsa04979~Cholesterol metabolism                   | 2  | 2/496  | 50/8037  | 0.823448 |
| hsa05218~Melanoma                                 | 3  | 3/496  | 72/8037  | 0.830146 |
| hsa04744~Phototransduction                        | 1  | 1/496  | 28/8037  | 0.832493 |
| hsa00562~Inositol phosphate metabolism            | 3  | 3/496  | 74/8037  | 0.843815 |
| hsa04726~Serotonergic synapse                     | 5  | 5/496  | 115/8037 | 0.846145 |
| hsa04961~Endocrine and other factor-regulated c   | 2  | 2/496  | 53/8037  | 0.847584 |
| hsa00410~beta-Alanine metabolism                  | 1  | 1/496  | 31/8037  | 0.86173  |
| hsa01523~Antifolate resistance                    | 1  | 1/496  | 31/8037  | 0.86173  |
| hsa04710~Circadian rhythm                         | 1  | 1/496  | 31/8037  | 0.86173  |
| hsa05412~Arrhythmogenic right ventricular cardi   | 3  | 3/496  | 77/8037  | 0.862529 |
| hsa04919~Thyroid hormone signaling pathway        | 5  | 5/496  | 119/8037 | 0.866291 |
| hsa05206~MicroRNAs in cancer                      | 15 | 15/496 | 310/8037 | 0.86981  |
| hsa04933~AGE-RAGE signaling pathway in diabetic   | 4  | 4/496  | 100/8037 | 0.873176 |
| hsa00983~Drug metabolism - other enzymes          | 3  | 3/496  | 79/8037  | 0.873885 |
| hsa00240~Pyrimidine metabolism                    | 2  | 2/496  | 57/8037  | 0.8751   |
| hsa04550~Signaling pathways regulating pluripot   | 6  | 6/496  | 143/8037 | 0.883334 |
| hsa04370~VEGF signaling pathway                   | 2  | 2/496  | 59/8037  | 0.887073 |
| hsa05204~Chemical carcinogenesis                  | 3  | 3/496  | 83/8037  | 0.894135 |
| hsa00310~Lysine degradation                       | 2  | 2/496  | 61/8037  | 0.897976 |
| hsa00250~Alanine, aspartate and glutamate metabol | 1  | 1/496  | 36/8037  | 0.899582 |
| hsa00350~Tyrosine metabolism                      | 1  | 1/496  | 36/8037  | 0.899582 |
| hsa00760~Nicotinate and nicotinamide metabolism   | 1  | 1/496  | 37/8037  | 0.905807 |
| hsa04911~Insulin secretion                        | 3  | 3/496  | 86/8037  | 0.907356 |
| hsa04927~Cortisol synthesis and secretion         | 2  | 2/496  | 65/8037  | 0.916902 |
| hsa04270~Vascular smooth muscle contraction       | 5  | 5/496  | 132/8037 | 0.917066 |
| hsa04728~Dopaminergic synapse                     | 5  | 5/496  | 132/8037 | 0.917066 |
| hsa05033~Nicotine addiction                       | 1  | 1/496  | 40/8037  | 0.922265 |
| hsa04725~Cholinergic synapse                      | 4  | 4/496  | 113/8037 | 0.924813 |
| hsa04720~Long-term potentiation                   | 2  | 2/496  | 67/8037  | 0.92508  |
| hsa04390~Hippo signaling pathway                  | 6  | 6/496  | 157/8037 | 0.928573 |
| hsa05031~Amphetamine addiction                    | 2  | 2/496  | 69/8037  | 0.932495 |
| hsa04360~Axon guidance                            | 7  | 7/496  | 181/8037 | 0.936339 |
| hsa05414~Dilated cardiomyopathy (DCM)             | 3  | 3/496  | 96/8037  | 0.941319 |
| hsa02010~ABC transporters                         | 1  | 1/496  | 45/8037  | 0.943566 |
| hsa05215~Prostate cancer                          | 3  | 3/496  | 97/8037  | 0.943991 |
| hsa04925~Aldosterone synthesis and secretion      | 3  | 3/496  | 98/8037  | 0.94655  |
| hsa04914~Progesterone-mediated oocyte maturatic   | 3  | 3/496  | 99/8037  | 0.949    |
| hsa00565~Ether lipid metabolism                   | 1  | 1/496  | 47/8037  | 0.950354 |
| hsa04973~Carbohydrate digestion and absorption    | 1  | 1/496  | 47/8037  | 0.950354 |
| hsa03320~PPAR signaling pathway                   | 2  | 2/496  | 76/8037  | 0.95334  |
| hsa04261~Adrenergic signaling in cardiomyocytes   | 5  | 5/496  | 149/8037 | 0.957488 |

|                                                 |           |          |          |
|-------------------------------------------------|-----------|----------|----------|
| hsa04660~T cell receptor signaling pathway      | 3 3/496   | 104/8037 | 0.959756 |
| hsa01521~EGFR tyrosine kinase inhibitor resist  | 2 2/496   | 79/8037  | 0.960249 |
| hsa04114~Oocyte meiosis                         | 4 4/496   | 128/8037 | 0.960351 |
| hsa04146~Peroxisome                             | 2 2/496   | 83/8037  | 0.967951 |
| hsa03008~Ribosome biogenesis in eukaryotes      | 3 3/496   | 111/8037 | 0.971285 |
| hsa01212~Fatty acid metabolism                  | 1 1/496   | 57/8037  | 0.973855 |
| hsa04060~Cytokine-cytokine receptor interactior | 11 11/496 | 294/8037 | 0.977119 |
| hsa04730~Long-term depression                   | 1 1/496   | 60/8037  | 0.978434 |
| hsa04020~Calcium signaling pathway              | 6 6/496   | 193/8037 | 0.982308 |
| hsa04929~GnRH secretion                         | 1 1/496   | 64/8037  | 0.983319 |
| hsa04510~Focal adhesion                         | 6 6/496   | 199/8037 | 0.986201 |
| hsa04151~PI3K-Akt signaling pathway             | 13 13/496 | 354/8037 | 0.987606 |
| hsa04972~Pancreatic secretion                   | 2 2/496   | 102/8037 | 0.988733 |
| hsa00982~Drug metabolism - cytochrome P450      | 1 1/496   | 72/8037  | 0.990024 |
| hsa00980~Metabolism of xenobiotics by cytochron | 1 1/496   | 77/8037  | 0.992767 |
| hsa04742~Taste transduction                     | 1 1/496   | 83/8037  | 0.995084 |
| hsa04512~ECM-receptor interaction               | 1 1/496   | 88/8037  | 0.996437 |
| hsa05410~Hypertrophic cardiomyopathy (HCM)      | 1 1/496   | 90/8037  | 0.996868 |
| hsa05034~Alcoholism                             | 4 4/496   | 187/8037 | 0.997566 |
| hsa04974~Protein digestion and absorpition      | 1 1/496   | 95/8037  | 0.997731 |
| hsa04080~Neuroactive ligand-receptor interactic | 7 7/496   | 340/8037 | 0.999932 |
| hsa04740~Olfactory transduction                 | 4 4/496   | 448/8037 | 1        |

| FDR      | foldEnrichment |
|----------|----------------|
| 1.89E-08 | 3.776786       |
| 3.41E-08 | 3.384302       |
| 3.41E-08 | 2.820875       |
| 6.40E-06 | 3.044977       |
| 2.09E-05 | 2.183124       |
| 2.09E-05 | 2.878276       |
| 2.09E-05 | 2.331888       |
| 5.99E-05 | 2.38495        |
| 0.000104 | 3.577425       |
| 0.001984 | 3.116083       |
| 0.003887 | 3.41129        |
| 0.004436 | 3.564798       |
| 0.005595 | 2.095992       |
| 0.005727 | 2.299164       |
| 0.012159 | 1.968665       |
| 0.012159 | 2.070464       |
| 0.023777 | 2.037582       |
| 0.033087 | 1.849729       |
| 0.03359  | 4.227034       |
| 0.045397 | 2.916653       |
| 0.06364  | 1.957485       |
| 0.077158 | 2.194241       |
| 0.110714 | 2.025454       |
| 0.121176 | 1.878682       |
| 0.121176 | 2.592581       |
| 0.121176 | 2.090791       |
| 0.121176 | 2.173658       |
| 0.121176 | 2.766473       |
| 0.121176 | 1.898863       |
| 0.12742  | 2.35214        |
| 0.164537 | 2.048735       |
| 0.173162 | 1.579167       |
| 0.173162 | 1.787165       |
| 0.173162 | 4.861089       |
| 0.202308 | 2.627616       |
| 0.215932 | 2.558468       |
| 0.215932 | 1.916558       |
| 0.218859 | 1.896169       |
| 0.218859 | 2.160484       |
| 0.218859 | 2.492866       |
| 0.218859 | 1.731686       |
| 0.22807  | 1.620363       |
| 0.237169 | 1.630554       |
| 0.237169 | 1.512339       |
| 0.237169 | 1.528644       |
| 0.237169 | 1.884143       |
| 0.237169 | 2.371263       |
| 0.252543 | 2.140102       |
| 0.252543 | 2.140102       |
| 0.252543 | 1.918851       |
| 0.253414 | 2.531817       |
| 0.254445 | 1.994293       |
| 0.2574   | 2.260971       |

0. 278834 1. 645681  
0. 285297 1. 437419  
0. 293885 2. 160484  
0. 311411 1. 878682  
0. 326761 1. 665794  
0. 39087 1. 984118  
0. 395693 2. 400538  
0. 441798 1. 432365  
0. 491883 1. 558041  
0. 491883 1. 558041  
0. 491883 2. 160484  
0. 491883 2. 160484  
0. 491883 1. 640874  
0. 491883 1. 585138  
0. 496202 1. 692916  
0. 496202 1. 528644  
0. 496202 2. 090791  
0. 496202 2. 090791  
0. 509636 1. 400314  
0. 528523 1. 841321  
0. 53995 1. 419296  
0. 53995 1. 620363  
0. 584062 1. 446753  
0. 600011 1. 433949  
0. 655286 1. 512339  
0. 655286 1. 800403  
0. 655286 1. 456506  
0. 655286 1. 456506  
0. 655286 1. 384926  
0. 655286 1. 316545  
0. 655286 1. 286002  
0. 655286 1. 543203  
0. 668117 1. 264673  
0. 690255 1. 409011  
0. 742826 1. 301021  
0. 748897 1. 337914  
0. 748897 1. 291594  
0. 775835 1. 246433  
0. 775835 1. 254475  
0. 775835 1. 254475  
0. 775835 1. 473057  
0. 782094 1. 219628  
0. 782094 1. 219628  
0. 786442 1. 388882  
0. 786442 1. 20324  
0. 786863 1. 157402  
0. 786863 1. 421371  
0. 786863 1. 421371  
0. 786863 1. 191443  
0. 786863 1. 620363  
0. 786863 1. 350302  
0. 786863 1. 396865  
0. 786863 1. 396865  
0. 801483 1. 331805



0. 805359 1. 568093  
0. 822296 1. 246433  
0. 822296 1. 196241  
0. 822296 1. 409011  
0. 822296 1. 215272  
0. 822296 1. 279234  
0. 822296 1. 279234  
0. 822296 1. 379032  
0. 822296 1. 473057  
0. 822296 1. 473057  
0. 822296 1. 473057  
0. 851929 1. 286002  
0. 868683 1. 322745  
0. 884814 1. 388882  
0. 907775 1. 350302  
0. 907775 1. 227548  
0. 907775 1. 270873  
0. 935999 1. 313808  
0. 947359 1. 145711  
0. 947359 1. 409011  
0. 947359 1. 080242  
0. 947359 1. 102288  
0. 947359 1. 174176  
0. 960582 1. 123024  
0. 961312 1. 350302  
0. 961312 1. 112014  
0. 961312 1. 112014  
0. 966032 1. 08932  
0. 966032 1. 08932  
0. 966032 1. 067305  
0. 966032 1. 104793  
0. 966032 1. 047648  
0. 966032 1. 060952  
0. 966999 1. 185631  
0. 969144 1. 092379  
0. 971567 1. 246433  
0. 971567 1. 09484  
0. 971567 1. 045395  
0. 971567 1. 049156  
0. 971567 1. 049156  
0. 972747 1. 068371  
0. 977744 1. 200269  
0. 977744 1. 473057  
0. 994866 1. 045395  
1 1. 012727  
1 1. 004876  
1 1. 000224  
1 1. 028802  
1 0. 990038  
1 0. 997146  
1 1. 034274  
1 0. 989535  
1 0. 985356  
1 0. 985356

1 0.992059  
1 0.997146  
1 1.012727  
1 1.012727  
1 0.972218  
1 0.972218  
1 0.953155  
1 0.953155  
1 0.953155  
1 0.946965  
1 0.945212  
1 0.939341  
1 0.917187  
1 0.914721  
1 0.900202  
1 0.900202  
1 0.953155  
1 0.953155  
1 0.953155  
1 0.88787  
1 0.900202  
1 0.900202  
1 0.900202  
1 0.864194  
1 0.852823  
1 0.861895  
1 0.852823  
1 0.852823  
1 0.852823  
1 0.830955  
1 0.852823  
1 0.810181  
1 0.830955  
1 0.810181  
1 0.810181  
1 0.835239  
1 0.790421  
1 0.826716  
1 0.826716  
1 0.7969  
1 0.771601  
1 0.818365  
1 0.771601  
1 0.883834  
1 0.83401  
1 0.810181  
1 0.810181  
1 0.81699  
1 0.753657  
1 0.736529  
1 0.836807  
1 0.720161  
1 0.762524  
1 0.784047

1 0.825185  
1 0.725536  
1 0.689516  
1 0.648145  
1 0.714866  
1 0.750168  
1 0.704506  
1 0.661373  
1 0.694441  
1 0.600134  
1 0.712247  
1 0.712247  
1 0.68466  
1 0.648145  
1 0.675151  
1 0.578701  
1 0.656904  
1 0.704506  
1 0.611458  
1 0.522698  
1 0.522698  
1 0.522698  
1 0.63131  
1 0.680825  
1 0.784047  
1 0.648145  
1 0.615328  
1 0.568548  
1 0.679873  
1 0.549276  
1 0.585673  
1 0.531267  
1 0.450101  
1 0.450101  
1 0.437936  
1 0.565243  
1 0.498573  
1 0.613774  
1 0.613774  
1 0.405091  
1 0.57358  
1 0.48369  
1 0.619247  
1 0.46967  
1 0.62666  
1 0.506363  
1 0.360081  
1 0.501143  
1 0.496029  
1 0.491019  
1 0.344758  
1 0.344758  
1 0.426411  
1 0.543746

1 0.467412  
1 0.410218  
1 0.506363  
1 0.390449  
1 0.437936  
1 0.284274  
1 0.606258  
1 0.27006  
1 0.50374  
1 0.253182  
1 0.488552  
1 0.595049  
1 0.317718  
1 0.22505  
1 0.210437  
1 0.195224  
1 0.184132  
1 0.18004  
1 0.346602  
1 0.170565  
1 0.333604  
1 0.144675
